# Supplementary material for: Pregnane X receptor exacerbates nonalcoholic fatty liver disease accompanied by obesity- and inflammation-prone gut microbiome signature
Source: Research Square preprint supplement (doi:10.21203/rs.3.rs-134429/v1), 2021-01-26
Supplement: Supplementary file 1 [file 4e344e1c465650dc7ff28f36.xlsx]

## Sheet: Table S1-5
Table S1. Differntially regulated liver genes of MWTHFD over MWTControl			Table S2. Differentially regulated liver genes of MPXRKOHFD over MPXRKOControl			Table S3. Differentially regulated liver genes of FWTHFD over FWTControl			Table S4. Differentially regulated liver genes of FPXRKOHFD over FPXRKOControl			Table S5. Joined read of 16S rDNA data
Gene Symbols	LogFC		Gene Symbols	LogFC		Gene Symbols	LogFC		Gene Symbols	LogFC		Type	Total number sequences written
Cyp2b13	2.88801		Obp2a	2.09912		Elovl3	1.74369		Tgtp2	2.07644		MWTCT1	61814
Ly6d	2.75649		Mup-ps28	1.66623		Saa2	1.12567		BC023105	2.05867		MWTCT2	75732
Cidec	2.57555		Gm12573	1.44978		Cdkn1a	1.11793		mt-Ts2	1.71365		MWTCT3	66590
Cyp2b9	2.26188		Cidec	1.33104		Saa1	1.10871		mt-Ts1	1.68613		MWTCT4	66758
Cidea	1.91761		Dbp	1.29567		Gm26440	1.02848		Gm10801	1.68036		MWTCT5	65403
Osbpl3	1.7589		Cav1	1.21989		Slc10a2	0.96662		Gbp10	1.58752		MWTCT6	56858
Ttc39aos1	1.74967		Vnn1	1.16208		Ctcflos	0.959813		Gm12250	1.57502		MWTHFD1	70426
Gm7665	1.62252		Mup-ps16	1.16112		Marco	0.949739		Gm12185	1.54354		MWTHFD2	74320
Anxa2	1.55214		Mup-ps14	1.09477		Lcn2	0.94071		Gbp11	1.37268		MWTHFD3	47459
Cd36	1.47906		Hsd17b6	1.01989		Gm24613	0.890684		Marco	1.31694		MWTHFD4	50537
Ifi27l2b	1.46338		Enpp2	1.00125		Ly6d	0.867508		Iigp1	1.26743		MWTHFD5	65786
Lgals1	1.4446		Serpina4-ps1	1.00102		Cidec	0.85443		Igtp	1.25421		MWTHFD6	52255
Gm3776	1.3085		Pparg	0.916107		Fitm1	0.818863		Serpina3g	1.20059		FWTCT1	59350
Slc22a27	1.27046		Acot2	0.914012		Ttc39aos1	0.813847		Gm17535	1.18707		FWTCT2	51513
S100a11	1.26022		Mup-ps12	0.899925		C730036E19Rik	0.802643		Cyp26a1	1.1699		FWTCT3	52051
Gbp10	1.23355		Ces2c	0.895313		Abcd1	0.782442		Gm10720	1.14704		FWTCT4	49367
Tgtp2	1.21206		Gm24613	0.891206		Alas1	0.779967		Gbp4	1.14427		FWTCT5	54224
Vnn1	1.19835		Gm26440	0.890332		Them7	0.779895		mt-Tc	1.13955		FWTCT6	123789
Clec7a	1.18581		Them7	0.864368		2010003K11Rik	0.75397		Gm10715	1.12478		FWTHFD1	31736
Pparg	1.10955		Chrna2	0.858468		Cyp7a1	0.752753		mt-Tp	1.09937		FWTHFD2	41226
9130409I23Rik	1.07063		Wee1	0.835358		Fam25c	0.739099		Gbp2	1.0501		FWTHFD3	48000
Cxcl9	1.02695		Tsku	0.832582		Phlda1	0.72765		Gbp3	1.01978		FWTHFD4	80932
Gbp2	0.997972		Tlr5	0.831936		Mt2	0.721598		Gm11168	1.01773		FWTHFD5	110511
BC023105	0.982492		Inhbe	0.82706		Gm20269	0.718428		Sult2a-ps2	1.01095		FWTHFD6	28022
Gstm3	0.979319		LOC100862356	0.816299		Gm8941	0.708719		Stat1	0.99514		MPXRKOCT1	121454
Inhbe	0.974091		Aldh3a2	0.8084		9130409I23Rik	0.696308		Gm10717	0.985329		MPXRKOCT2	53100
Serpina3g	0.969971		Aox3	0.7974		Lrg1	0.686605		Zbp1	0.983211		MPXRKOCT3	131195
Gm12185	0.946229		Ces2d-ps	0.792937		Gadd45g	0.684808		Gm10719	0.953579		MPXRKOCT4	137160
Cyp2a4	0.932313		Spry4	0.79216		Orm3	0.684654		Gm10800	0.93264		MPXRKOCT5	144865
Slc39a4	0.9206		Cyp2u1	0.781377		Cenpm	0.684374		Gbp8	0.931428		MPXRKOCT6	50806
Gm12250	0.915915		Ciart	0.765035		Rcan1	0.672674		Hao2	0.928818		FPXRKOCT1	127467
Gsta2	0.89943		Osbpl3	0.756857		Abcc3	0.666439		Elovl3	0.928546		FPXRKOCT2	59151
9030619P08Rik	0.893913		Ddah1	0.749114		LOC215866	0.663509		Gm10718	0.907619		FPXRKOCT3	125936
Anxa5	0.893791		Dio1	0.737554		Inhbe	0.657589		Gm10721	0.90176		FPXRKOCT4	118091
Cd74	0.890986		Mup-ps10	0.732336		Ifi27l2b	0.64045		Cd74	0.889786		FPXRKOCT5	32798
Cyp2a5	0.888674		Mup-ps13	0.715182		C8a	0.637529		Gbp7	0.873684		FPXRKOCT6	27228
Tubb2a	0.878038		Ppm1k	0.712762		mt-Ts2	0.634162		mt-Ta	0.860492		MPXRKOHFD1	48284
Acot2	0.877916		Ces2e	0.711787		H60b	0.631473		Sult2a-ps1	0.823677		MPXRKOHFD2	110952
Hsd17b6	0.875812		Alg3	0.704998		Mfsd2a	0.628739		Gbp9	0.801422		MPXRKOHFD3	47887
G0s2	0.874054		Abhd6	0.69737		Msmo1	0.617209		Gm21738	0.777015		MPXRKOHFD4	129714
Gbp11	0.867507		Nr1d1	0.695912		Acot2	0.615394		H2-Ab1	0.772273		MPXRKOHFD5	53262
Gm3788	0.860644		Nr1i3	0.69026		Ly96	0.609257		Cxcl9	0.75827		MPXRKOHFD6	64529
2010003K11Rik	0.859729		Gpcpd1	0.682583		Gm4952	0.605988		Apol9a	0.753718		FPXRKOHFD1	30811
Abhd2	0.854197		Slc25a30	0.67878		Trp53inp2	0.599389		Gvin1	0.747475		FPXRKOHFD2	33935
Gm19619	0.844725		Abcg8	0.676001		Slc22a5	0.595846		LOC215866	0.722307		FPXRKOHFD3	57521
Gbp8	0.841713		Tlcd2	0.673455		Slc13a3	0.589046		Scarna6	0.721311		FPXRKOHFD4	57704
Gbp4	0.836309		LOC102631757	0.672041		Gm22519	0.585776		Cd180	0.714995		FPXRKOHFD5	35445
Spp1	0.824605		Fzd8	0.671706		Inmt	-0.585057		Sult2a3	0.713791		FPXRKOHFD6	41943
H2-Eb1	0.805614		Slc22a7	0.661902		n-R5s168	-0.58595		H2-Eb1	0.713272
Abcc3	0.800379		Hsd3b2	0.661831		n-R5s88	-0.58635		Sult2a4	0.708512
Rcan1	0.783704		Fitm1	0.652111		Sult3a1	-0.587419		Irgm2	0.694096
LOC100862356	0.767034		Gm4899	0.644095		n-R5s205	-0.589207		Apol9b	0.678314
Lyve1	0.746236		Sult5a1	0.64267		n-R5s28	-0.599178		Dbp	0.673082
Tlr5	0.74218		Synj2	0.640282		n-R5s152	-0.604743		Ly6a	0.66337
H2-Ab1	0.739145		Fam102a	0.639657		Acacb	-0.608064		Ciart	0.659064
Lcn2	0.731601		Gm12431	0.634773		Ighv1-55	-0.623554		Gm12573	0.658845
Cd300ld	0.725772		Gstk1	0.631464		Mr1	-0.636066		Irgm1	0.658109
Klf6	0.723329		Tbc1d7	0.628898		Enpep	-0.638373		Cd5l	0.642207
Omd	0.722593		Cyp8b1	0.628783		Rassf6	-0.646207		Adgre1	0.636399
Aldh3a2	0.716541		Aadat	0.624301		Abca8a	-0.648998		Il2rg	0.635892
Gpc1	0.714837		Acaa1b	0.618716		Slc22a26	-0.671479		Sult2a5	0.631949
H2-DMb1	0.714551		Slc25a10	0.617848		n-R5s156	-0.672884		Mup-ps28	0.627798
Igsf6	0.701352		Serpina12	0.61731		Ighv1-12	-0.691373		Tap1	0.625061
Cd68	0.698438		Pctp	0.616857		Acmsd	-0.707667		Sult2a1	0.623574
Gbp9	0.693675		Acy3	0.61547		n-R5s86	-0.707763		Wee1	0.613646
Gm8034	0.688707		Rtn4ip1	0.613871		Gm11437	-0.712806		Ifit1	0.603134
Entpd5	0.686041		Slc2a5	0.613837		Me1	-0.732262		Themis2	0.594677
Gm13588	0.684251		Abat	0.603889		Rnu73b	-0.759091		Hmgcr	0.594066
Gm11695	0.678129		Gys2	0.603444		LOC100861787	-0.778446		Per3	0.592411
Ms4a6c	0.675721		Slc17a8	0.602244		Gm25788	-0.789678		8430408G22Rik	0.590291
Ifi44	0.675669		Cyp4a12a	0.593785		n-R5s210	-0.796434		Herc6	0.587818
Zbp1	0.672706		Papss2	0.589522		Acss2	-0.796814		Hsd3b5	-0.588258
Postn	0.669633		Slco1a4	0.586832		Cyp3a44	-0.800628		Nudt12	-0.592653
Sulf2	0.667176		Usp2	0.585075		Gm23344	-0.808912		Avpr1a	-0.614325
Cdkn1a	0.66535		Gm8430	-0.585623		Prss8	-0.836875		Uprt	-0.615148
Obp2a	0.663287		Adgre1	-0.58805		Aacs	-0.87744		Mr1	-0.620589
Fam102a	0.654668		Snora69	-0.591184		Sytl5	-0.894451		Gadd45g	-0.624912
Igsf11	0.651776		Acaca	-0.593689		n-R5s176	-0.897051		Gabbr2	-0.627304
Ermp1	0.648311		Snord89	-0.594142		Acly	-0.904102		Cry1	-0.629827
Tbc1d31	0.646307		Gm14699	-0.595		Fasn	-0.909515		Slc30a10	-0.632828
AW112010	0.639336		mt-Tk	-0.595473		Snord71	-0.910288		Clpx	-0.633098
Bgn	0.637772		Itgb2	-0.597678		Cyp3a16	-0.943552		Inhba	-0.636355
Acss3	0.636309		Id1	-0.598609		Chrna4	-0.962882		C8b	-0.649317
Serpina7	0.635722		n-R5s210	-0.599305		Rnu3a	-1.00992		Elovl6	-0.674205
Ucp2	0.630095		Gm24698	-0.602281		Snora31	-1.06629		Chka	-0.679012
Col3a1	0.630075		Cyp39a1	-0.602648		Gm24143	-1.06958		Orm2	-0.687142
Vim	0.627623		Zbtb16	-0.612317		Fmo3	-1.28127		Vps33b	-0.687798
Plekha1	0.627245		Gm16363	-0.616251		Elovl6	-1.2816		Gm11295	-0.753311
Dpt	0.627042		mt-Ts2	-0.616713		G6pdx	-1.28671		Mt2	-0.76453
Cyp4a14	0.619566		Snord13	-0.616807		Snora73b	-1.29427		Gm9847	-0.786513
Slc16a5	0.619431		Cd300e	-0.625614		Snora73a	-1.29582		Serpina4-ps1	-0.800964
Them7	0.617985		Gm24044	-0.625928		Snora73b	-1.3082		Pdk4	-0.807988
LOC100862316	0.615792		Gm19528	-0.630256		Acaca	-1.3111		Ppp1r3c	-0.823043
Vcam1	0.615071		Snord13	-0.633483		Acpp	-1.42405		Acpp	-0.936897
Gbp3	0.613129		Gm10719	-0.63573		Gm23442	-1.49081		Egfr	-0.939564
Igtp	0.612482		Lilr4b	-0.636441		Snord45b	-1.50703		Cdkn1a	-0.969211
Cyp2c38	0.611132		Gm11168	-0.648106		Gm11295	-1.50978		Sytl5	-1.01599
Cyp2b10	0.611074		Gm10717	-0.654978		Gm23105	-1.57776		Arntl	-1.02669
Slc25a30	0.610611		Tyrobp	-0.656145		Gm26175	-1.83031		G6pdx	-1.1182
LOC100861882	0.610064		Gm24119	-0.657239		Rnu3a	-1.84749		Lepr	-1.19959
Gm10680	0.604467		Gm26493	-0.671809		Fabp5	-1.92285		Fabp5	-1.22698
Cyp8b1	0.602828		Snord15a	-0.673258		Pnpla3	-1.9533		Saa1	-1.26521
Adora1	0.597873		Gm26448	-0.677307		Fabp5l2	-2.04192		Saa2	-1.32297
Ly96	0.594546		Gm25820	-0.678363		Gm13998	-2.13587		Gm14328	-1.36113
Hexb	0.593773		Gm24143	-0.684879		Lepr	-2.24708		Gm13998	-1.39458
Cyr61	0.589964		Vcam1	-0.689533		Gm14328	-2.33089		Fabp5l2	-1.46348
Spon2	0.589468		Gm10720	-0.697345		Gm6166	-2.48606		Gm6166	-1.5301
Gm15611	-0.590329		Gm25636	-0.708405		Gm3601	-2.94347		Gm3601	-1.72115
Gabbr2	-0.593566		Postn	-0.712817
Nudt7	-0.595715		Tgtp2	-0.715984
Gm23442	-0.598264		Cd9-ps	-0.718054
Gm25931	-0.603311		Lilrb4a	-0.721097
Gm11437	-0.605815		Ctss	-0.735451
Klk1b4	-0.60664		Nipal1	-0.73975
Efna1	-0.608231		Gm17535	-0.741589
Snord13	-0.612186		Cd9	-0.74203
Ppp1r3c	-0.613095		Wfdc17	-0.74612
Bcl6	-0.617736		Ptprc	-0.755069
Pmvk	-0.618317		Clec7a	-0.769432
Urad	-0.637547		Gm21748	-0.771731
Snora73a	-0.639898		Gm21860	-0.771731
Abca8a	-0.640887		Gm23344	-0.77189
Adh6-ps1	-0.651887		Gm10715	-0.771909
Snora73b	-0.661707		Rnu3a	-0.772092
Igfbp1	-0.662573		Ccl6	-0.779527
Apom	-0.663994		Chka	-0.795518
Lrrc16a	-0.667075		Serpina3g	-0.796511
Hamp2	-0.686227		G6pdx	-0.810847
Snora73b	-0.689878		Snord45b	-0.826
Zbtb16	-0.704146		Alox5ap	-0.844164
G6pdx	-0.707019		Ms4a6c	-0.848351
Chrna4	-0.721328		Dnajc12	-0.854707
Elovl3	-0.724072		Snora31	-0.856796
Cyp7b1	-0.726187		Lcn2	-0.857203
Slco2a1	-0.726947		Gm23105	-0.85811
Cyp4f14	-0.733983		Apcs	-0.859367
Il1r1	-0.740606		Gm23442	-0.931256
Acmsd	-0.751981		Gm10801	-0.936539
Egfr	-0.761986		Gm26175	-0.950753
Foxq1	-0.785516		Arntl	-0.97742
Hamp	-0.795499		Lyz1	-0.97753
Serpine2	-0.807647		Acpp	-1.03741
Gm26175	-0.811743		Snora73b	-1.06725
Sqle	-0.811806		Snora73a	-1.07176
Rdh11	-0.814429		Pnpla3	-1.10313
Cyp4a12a	-0.816064		Snora73b	-1.11077
Nudt7	-0.82381		Ly6c2	-1.1126
Ccbl1	-0.842306		Rnu3a	-1.12283
Cyp4a12b	-0.847541		Lyz2	-1.1229
Acss2	-0.893218		Orm3	-1.1376
Igfbp2	-0.91296		Sqle	-1.17399
Cdh1	-0.921951		Saa1	-1.20525
Cxcl13	-0.97387		Lepr	-1.24028
Gm23340	-1.01309		Cxcl13	-1.30689
C8b	-1.10043		Cxcl1	-1.30863
Lepr	-1.15845		Saa2	-1.39013
Pnpla3	-1.22053		Fabp5l2	-1.40372
Fabp5l2	-1.34704		Orm2	-1.50739
Serpina4-ps1	-1.45008		Cdkn1a	-1.57841
Avpr1a	-1.48607		Igfbp1	-1.62448
Slco1a1	-1.53428		Fabp5	-1.6943
Gm13998	-1.58335		Marco	-1.71806
Fabp5	-1.59306		Gm13998	-1.83303
Acpp	-1.71787		Gm14328	-2.22795
Gm14328	-1.79734		Gm6166	-2.33407
Gm6166	-2.26352		Gm3601	-2.80792
Hsd3b5	-2.41933		S100a9	-3.0058
Gm3601	-2.61811		S100a8	-3.60289

## Sheet: Table S6
Table S6. L7 level bacteria abundance
# Constructed from biom file
#OTU ID	WtChowM	WtChowM	WtChowM	WtChowM	WtChowM	WtChowM	WtHFDM	WtHFDM	WtHFDM	WtHFDM	WtHFDM	WtHFDM	PXRKOChowM	PXRKOChowM	PXRKOChowM	PXRKOChowM	PXRKOChowM	PXRKOChowM	PXRKOHFDM	PXRKOHFDM	PXRKOHFDM	PXRKOHFDM	PXRKOHFDM	PXRKOHFDM	WtChowF	WtChowF	WtChowF	WtChowF	WtChowF	WtChowF	WtHFDF	WtHFDF	WtHFDF	WtHFDF	WtHFDF	WtHFDF	PXRKOChowF	PXRKOChowF	PXRKOChowF	PXRKOChowF	PXRKOChowF	PXRKOChowF	PXRKOHFDF	PXRKOHFDF	PXRKOHFDF	PXRKOHFDF	PXRKOHFDF	PXRKOHFDF
Unassigned;Other;Other;Other;Other;Other;Other	6.257	8.75097	1.08045	0.760538	1.31052	1.44896	0.595091	6.76459	2.94728	2.1688	2.97245	6.07119	9.72977	8.9033	0.0447659	0.861694	0.630621	0.0730282	7.26011	2.79212	0.741325	3.3048	0.660585	0.437695	0.27828	0.683454	0.151809	0.0430663	1.15832	4.58479	0.657395	0.348956	0.361874	0.422188	0.0854368	1.24133	0.645934	0.415295	1.33844	0.922997	2.93401	0.587946	3.20476	1.41633	1.01364	3.3804	1.26416	0.024633
k__Archaea;p__Crenarchaeota;c__MCG;o__pGrfC26;f__;g__;s__	0	0	0	0	0	0	0	0	0	0	0	0	0	0	0	0	0	0	0	0	0	0	0	0	0	0	0	0	0	0	0.013214	0	0	0	0	0	0	0	0	0	0	0	0	0	0	0	0	0
k__Archaea;p__Euryarchaeota;c__Methanobacteria;o__Methanobacteriales;f__Methanobacteriaceae;g__Methanobrevibacter;s__	0	0	0	0	0	0	0	0	0.00218317	0	0	0	0	0	0	0	0	0	0	0	0	0	0	0	0	0.00201609	0	0	0.00573427	0	0.00660698	0.00254712	0	0	0.0018986	0	0	0	0	0	0.0194822	0	0	0	0	0	0	0
k__Bacteria;Other;Other;Other;Other;Other;Other	0	0.00135632	0.00154571	0.00153955	0.00158275	0	0	0	0	0.00207939	0.00157272	0	0	0	0	0.000749299	0	0	0.00243193	0	0	0.00174857	0	0	0.00180701	0	0	0.00215332	0	0.00250855	0	0	0.00219317	0	0.000949298	0	0	0	0	0	0	0	0	0	0	0	0	0
k__Bacteria;p__Acidobacteria;c__Acidobacteria-6;o__iii1-15;f__;g__;s__	0	0	0	0	0	0	0	0	0	0	0	0	0	0	0	0	0	0	0	0	0	0	0	0	0	0	0	0	0	0	0	0	0	0	0	0	0	0	0	0	0	0	0	0	0	0.0124475	0	0
k__Bacteria;p__Acidobacteria;c__Acidobacteria-6;o__iii1-15;f__mb2424;g__;s__	0	0	0	0	0	0	0	0	0	0	0	0	0	0	0	0	0	0	0	0	0	0	0	0	0	0	0	0.00430663	0	0	0	0	0	0	0	0	0	0	0	0	0	0	0	0	0	0	0	0
k__Bacteria;p__Actinobacteria;c__Acidimicrobiia;o__Acidimicrobiales;f__;g__;s__	0	0.00271264	0	0	0	0	0	0	0	0	0	0	0	0	0	0	0	0	0	0	0	0.00349715	0	0	0	0	0	0	0	0	0	0	0	0	0	0	0	0	0	0	0	0	0	0	0	0	0	0
k__Bacteria;p__Actinobacteria;c__Acidimicrobiia;o__Acidimicrobiales;f__Microthrixaceae;g__;s__	0	0	0	0	0	0	0	0	0	0	0	0	0	0	0	0	0	0.00811425	0	0	0	0	0	0	0	0	0	0	0	0	0	0	0	0	0	0	0	0	0	0	0	0	0	0	0	0	0	0
k__Bacteria;p__Actinobacteria;c__Actinobacteria;o__Actinomycetales;Other;Other;Other	0	0	0	0	0	0.00366824	0	0	0	0	0	0	0	0	0	0	0	0	0	0	0	0	0	0	0	0	0	0	0	0	0	0	0	0	0	0	0	0	0	0	0	0	0	0	0	0	0	0
k__Bacteria;p__Actinobacteria;c__Actinobacteria;o__Actinomycetales;f__;g__;s__	0	0	0	0.0030791	0	0	0	0	0	0.00207939	0	0	0.000843939	0	0.00157073	0.000749299	0	0	0	0	0	0	0	0	0	0.00201609	0	0	0	0	0	0	0	0	0	0	0	0	0	0	0	0	0	0.00921687	0	0	0	0
k__Bacteria;p__Actinobacteria;c__Actinobacteria;o__Actinomycetales;f__Actinomycetaceae;g__Actinomyces;s__	0	0	0	0	0	0	0	0.00414159	0	0.00207939	0.00157272	0	0	0	0	0	0	0	0	0	0	0	0	0	0	0.00201609	0	0	0	0	0	0	0	0	0	0	0	0.000924932	0	0	0	0.00158904	0	0	0	0	0	0
k__Bacteria;p__Actinobacteria;c__Actinobacteria;o__Actinomycetales;f__Actinomycetaceae;g__Arcanobacterium;s__	0	0	0	0	0	0	0	0	0	0	0	0	0	0	0.0023561	0	0	0	0	0	0	0	0	0	0	0	0	0	0	0	0	0	0	0	0	0	0	0	0	0	0	0	0	0	0	0	0	0
k__Bacteria;p__Actinobacteria;c__Actinobacteria;o__Actinomycetales;f__Actinomycetaceae;g__N09;s__	0	0	0	0.00153955	0	0	0	0	0	0	0	0	0	0	0	0	0	0	0	0	0	0	0	0	0	0	0	0	0	0	0.00991048	0	0	0	0	0	0	0	0	0	0	0	0	0	0	0	0	0
k__Bacteria;p__Actinobacteria;c__Actinobacteria;o__Actinomycetales;f__Actinomycetaceae;g__Varibaculum;s__	0	0	0	0	0	0	0	0	0	0	0	0	0	0	0	0	0	0	0	0	0	0	0	0	0	0	0	0.00430663	0	0	0	0	0	0	0	0	0	0	0	0	0	0	0	0	0	0	0	0
k__Bacteria;p__Actinobacteria;c__Actinobacteria;o__Actinomycetales;f__Actinosynnemataceae;g__Kutzneria;s__	0	0	0	0	0	0	0	0	0	0	0	0	0	0	0	0	0	0	0	0	0	0	0	0	0	0	0	0	0	0	0	0	0	0	0	0	0	0	0	0	0.00389643	0	0	0	0	0	0	0
k__Bacteria;p__Actinobacteria;c__Actinobacteria;o__Actinomycetales;f__Bogoriellaceae;g__Georgenia;s__	0	0	0	0	0	0	0	0	0	0	0	0	0	0	0	0	0	0	0	0	0	0	0	0	0	0	0	0	0	0	0	0	0	0	0	0	0	0	0	0	0	0	0	0.021506	0	0	0	0
k__Bacteria;p__Actinobacteria;c__Actinobacteria;o__Actinomycetales;f__Brevibacteriaceae;g__Brevibacterium;s__	0	0	0	0	0	0	0	0	0	0	0	0	0	0	0	0	0	0	0	0	0.00406875	0.00437143	0	0	0	0	0	0	0	0	0	0	0	0	0	0	0	0	0	0	0	0	0	0	0	0	0	0
k__Bacteria;p__Actinobacteria;c__Actinobacteria;o__Actinomycetales;f__Cellulomonadaceae;g__Actinotalea;s__	0	0	0	0	0	0	0	0	0	0	0	0.00198535	0.000843939	0	0	0	0	0	0	0	0	0	0	0	0	0	0	0	0	0	0	0	0	0	0	0	0	0	0	0	0	0	0	0.0245783	0	0	0	0
k__Bacteria;p__Actinobacteria;c__Actinobacteria;o__Actinomycetales;f__Cellulomonadaceae;g__Cellulomonas;s__	0	0	0	0	0	0	0	0	0	0	0	0	0.00253182	0	0	0	0	0	0	0	0.0016275	0	0	0	0	0	0.00199748	0	0	0	0	0	0	0	0	0	0	0	0	0	0	0	0	0.0522289	0	0.00355644	0.0146314	0
k__Bacteria;p__Actinobacteria;c__Actinobacteria;o__Actinomycetales;f__Cellulomonadaceae;g__Cellulomonas;s__xylanilytica	0	0	0	0	0	0	0	0	0	0	0	0	0	0	0	0	0	0	0	0	0	0	0	0	0	0	0	0	0	0	0	0	0	0	0	0	0	0	0	0	0	0	0	0.0399398	0	0.00177822	0	0
k__Bacteria;p__Actinobacteria;c__Actinobacteria;o__Actinomycetales;f__Corynebacteriaceae;g__Corynebacterium;Other	0	0	0	0	0	0	0	0	0	0	0	0	0	0	0	0	0	0	0	0.00695422	0.000813749	0	0	0	0	0	0	0	0	0	0	0	0	0	0	0	0.00213885	0	0	0	0	0	0.00334526	0	0	0.016004	0.00585257	0.00492659
k__Bacteria;p__Actinobacteria;c__Actinobacteria;o__Actinomycetales;f__Corynebacteriaceae;g__Corynebacterium;s__	0.00501765	0.00949423	0.0170029	0.044647	0.0284896	0.089872	0	0.0345132	0	0.00831756	0.0251636	0	0.00421969	0.00774368	0	0.0014986	0.00142192	0.0385427	0.0235086	0.109529	0.0235987	0.0139886	0.358603	0.0228363	0.0126491	0.00201609	0	0	0.00191142	0.00167237	0.383205	0	0	0.548462	0.044617	0.116257	0.0106943	0.110992	0.0192736	0.0102819	0.0740322	0.0254247	0.0267621	0.021506	0	0.19027	0.0351154	0.0492659
k__Bacteria;p__Actinobacteria;c__Actinobacteria;o__Actinomycetales;f__Corynebacteriaceae;g__Corynebacterium;s__kroppenstedtii	0	0	0.00154571	0	0	0	0	0	0	0	0	0	0	0	0	0	0	0	0	0	0	0	0	0	0	0	0	0	0	0	0	0	0	0.0242344	0	0	0	0	0	0	0	0	0	0	0	0	0	0
k__Bacteria;p__Actinobacteria;c__Actinobacteria;o__Actinomycetales;f__Dermabacteraceae;g__Brachybacterium;s__conglomeratum	0	0	0	0	0	0	0	0	0	0	0.00157272	0	0	0	0	0	0	0	0	0	0	0	0	0	0.00180701	0	0.00599245	0	0	0	0	0	0	0	0	0	0	0	0	0	0	0	0	0	0	0	0	0
k__Bacteria;p__Actinobacteria;c__Actinobacteria;o__Actinomycetales;f__Dermacoccaceae;g__Dermacoccus;s__	0	0	0	0	0	0	0	0	0	0	0	0	0.00421969	0.00193592	0	0	0	0	0	0	0.00569624	0.00174857	0	0	0.00180701	0	0	0	0	0	0	0	0	0	0	0	0	0	0	0	0	0.00635617	0	0	0	0	0	0
k__Bacteria;p__Actinobacteria;c__Actinobacteria;o__Actinomycetales;f__Dermatophilaceae;Other;Other	0	0	0	0	0	0	0	0	0	0	0	0	0	0	0	0	0	0	0	0	0	0.00174857	0	0	0	0	0	0	0	0	0	0	0	0	0	0	0	0	0	0	0	0	0	0	0	0	0	0
k__Bacteria;p__Actinobacteria;c__Actinobacteria;o__Actinomycetales;f__Frankiaceae;g__;s__	0	0	0	0	0	0	0	0	0	0	0	0	0	0	0	0	0	0	0	0	0	0.00174857	0	0	0	0	0	0	0	0	0	0	0	0	0	0	0	0	0	0	0	0	0	0	0	0	0	0
k__Bacteria;p__Actinobacteria;c__Actinobacteria;o__Actinomycetales;f__Geodermatophilaceae;Other;Other	0	0	0	0	0	0	0	0	0	0	0	0	0.000843939	0	0	0.000749299	0	0	0	0	0	0	0	0	0	0	0	0	0	0	0	0	0	0	0	0	0	0	0	0	0	0	0	0.00614458	0	0	0	0
k__Bacteria;p__Actinobacteria;c__Actinobacteria;o__Actinomycetales;f__Geodermatophilaceae;g__;s__	0	0	0	0.00769776	0	0	0	0	0	0	0	0	0	0	0	0	0	0	0	0	0	0	0	0	0	0	0	0	0	0	0	0	0	0	0	0	0	0	0	0	0	0	0	0	0	0	0	0
k__Bacteria;p__Actinobacteria;c__Actinobacteria;o__Actinomycetales;f__Geodermatophilaceae;g__Modestobacter;s__	0	0	0	0	0	0	0	0	0	0	0	0	0	0	0	0	0	0.0101428	0	0	0	0	0	0	0	0	0	0	0	0	0	0	0	0	0	0	0	0	0	0	0	0	0	0.193554	0	0	0	0
k__Bacteria;p__Actinobacteria;c__Actinobacteria;o__Actinomycetales;f__Gordoniaceae;g__Gordonia;s__	0	0	0	0	0	0	0	0	0	0	0	0	0	0	0	0	0	0	0	0.00173856	0	0.000874286	0	0	0	0	0	0	0	0	0	0	0	0	0	0	0	0	0	0	0.00779287	0	0	0	0	0	0	0
k__Bacteria;p__Actinobacteria;c__Actinobacteria;o__Actinomycetales;f__Intrasporangiaceae;Other;Other	0	0	0	0	0.012662	0	0	0	0	0	0	0	0	0	0	0	0	0	0	0	0.003255	0.000874286	0	0	0	0	0	0	0	0	0	0	0	0	0	0	0	0	0	0	0.00194822	0	0	0	0.00183298	0	0	0
k__Bacteria;p__Actinobacteria;c__Actinobacteria;o__Actinomycetales;f__Intrasporangiaceae;g__;s__	0	0	0	0	0.00474826	0	0	0	0	0	0	0.00198535	0	0	0	0	0	0	0	0	0	0	0	0	0	0	0	0	0	0	0	0	0	0	0	0	0	0	0	0	0.00194822	0	0	0	0	0	0	0
k__Bacteria;p__Actinobacteria;c__Actinobacteria;o__Actinomycetales;f__Intrasporangiaceae;g__Phycicoccus;s__	0	0	0	0	0	0	0	0	0	0	0	0	0	0	0	0	0	0	0	0	0	0.00174857	0	0	0	0	0	0	0	0	0	0	0	0	0	0	0	0	0	0	0	0	0	0	0	0	0	0
k__Bacteria;p__Actinobacteria;c__Actinobacteria;o__Actinomycetales;f__Intrasporangiaceae;g__Serinicoccus;s__	0	0	0	0	0	0	0	0	0	0	0	0	0	0	0	0	0	0	0	0	0	0	0	0	0	0	0	0	0	0	0	0	0	0	0	0	0	0	0	0	0	0	0	0	0.00366596	0	0	0
k__Bacteria;p__Actinobacteria;c__Actinobacteria;o__Actinomycetales;f__Microbacteriaceae;g__;s__	0	0	0	0.00153955	0.00316551	0.0183412	0	0	0	0.00623817	0	0	0	0	0	0	0	0	0.00162128	0	0	0	0	0	0	0	0	0	0	0	0.0594629	0	0	0	0	0	0	0	0	0	0	0	0	0.264217	0	0	0	0
k__Bacteria;p__Actinobacteria;c__Actinobacteria;o__Actinomycetales;f__Microbacteriaceae;g__Cryocola;s__	0	0	0	0	0	0	0	0	0	0	0	0	0	0	0	0	0.00142192	0.0121714	0.00324257	0	0	0.000874286	0	0	0	0	0	0	0	0	0.00991048	0	0	0	0	0	0	0	0	0	0	0	0	0	0	0	0	0
k__Bacteria;p__Actinobacteria;c__Actinobacteria;o__Actinomycetales;f__Microbacteriaceae;g__Leucobacter;s__	0	0	0	0	0	0	0	0	0	0	0.00629089	0	0	0	0	0	0	0	0.00162128	0	0	0	0	0	0	0.00604827	0	0	0	0	0	0	0	0	0	0	0	0	0	0	0	0	0	0	0	0	0	0
k__Bacteria;p__Actinobacteria;c__Actinobacteria;o__Actinomycetales;f__Microbacteriaceae;g__Rathayibacter;s__caricis	0	0	0	0	0	0	0	0	0	0	0	0	0.000843939	0	0	0	0	0	0	0	0	0	0	0	0	0	0	0	0	0	0.00660698	0	0	0	0	0	0	0	0	0	0	0	0	0	0	0	0	0
k__Bacteria;p__Actinobacteria;c__Actinobacteria;o__Actinomycetales;f__Microbacteriaceae;g__Salinibacterium;s__	0	0	0	0	0	0	0	0	0	0	0.00157272	0	0	0	0	0	0.000710959	0.0101428	0.000810642	0	0	0	0	0	0	0	0	0	0	0	0	0	0	0	0	0	0	0	0	0	0	0	0	0.0122892	0	0	0	0
k__Bacteria;p__Actinobacteria;c__Actinobacteria;o__Actinomycetales;f__Micrococcaceae;g__;s__	0	0.00271264	0	0	0	0	0	0	0	0	0	0.00198535	0	0	0	0	0	0	0	0	0	0.00524572	0	0	0	0	0	0	0.00191142	0	0	0	0	0	0	0.00375023	0	0	0	0	0	0	0	0	0	0	0	0
k__Bacteria;p__Actinobacteria;c__Actinobacteria;o__Actinomycetales;f__Micrococcaceae;g__Kocuria;Other	0	0	0	0	0	0	0	0	0	0	0.00314545	0	0	0	0	0	0	0	0	0	0	0	0	0	0	0	0	0	0	0	0	0	0	0	0	0	0	0	0	0	0	0	0	0	0	0	0	0
k__Bacteria;p__Actinobacteria;c__Actinobacteria;o__Actinomycetales;f__Micrococcaceae;g__Kocuria;s__	0	0.0217011	0	0	0	0	0	0	0	0	0	0	0	0	0	0	0	0	0	0	0	0	0	0	0	0	0	0	0	0	0	0	0	0	0	0	0	0	0	0	0	0	0	0	0	0	0	0
k__Bacteria;p__Actinobacteria;c__Actinobacteria;o__Actinomycetales;f__Micrococcaceae;g__Kocuria;s__palustris	0	0	0	0	0	0	0	0	0	0	0.00471817	0	0	0	0	0	0	0	0	0	0	0	0	0	0	0	0	0	0	0	0	0	0	0	0	0	0	0	0	0	0	0	0	0	0	0	0	0
k__Bacteria;p__Actinobacteria;c__Actinobacteria;o__Actinomycetales;f__Micrococcaceae;g__Kocuria;s__rhizophila	0	0	0	0	0	0	0	0	0	0	0	0	0	0	0	0	0	0	0	0	0	0.00174857	0	0	0	0	0	0	0	0	0	0	0	0.00255099	0	0	0	0	0.0385472	0	0	0	0	0.0153615	0	0	0	0
k__Bacteria;p__Actinobacteria;c__Actinobacteria;o__Actinomycetales;f__Micrococcaceae;g__Microbispora;s__rosea	0	0	0	0	0	0	0	0	0	0	0.00157272	0	0.00168788	0	0	0	0	0	0	0	0	0	0	0	0	0	0	0	0	0	0	0	0	0	0	0	0	0	0	0	0	0	0	0	0	0	0	0
k__Bacteria;p__Actinobacteria;c__Actinobacteria;o__Actinomycetales;f__Micrococcaceae;g__Micrococcus;Other	0	0	0	0	0.00316551	0	0	0	0	0	0	0	0	0	0	0	0	0	0	0	0	0	0.0157282	0	0	0	0	0	0	0	0	0	0	0	0	0.0187512	0	0	0	0	0	0	0	0	0	0	0.00292629	0
k__Bacteria;p__Actinobacteria;c__Actinobacteria;o__Actinomycetales;f__Micrococcaceae;g__Micrococcus;s__	0	0	0	0	0.0870515	0	0	0	0	0	0.00629089	0	0.000843939	0	0	0	0.00284384	0	0	0	0	0.00524572	0.361749	0.00380604	0	0.00201609	0.00199748	0	0	0	0	0	0	0	0	0.00375023	0.00213885	0	0.0235566	0	0.0136375	0	0	0.0122892	0	0	0.00877886	0
k__Bacteria;p__Actinobacteria;c__Actinobacteria;o__Actinomycetales;f__Micrococcaceae;g__Nesterenkonia;s__	0	0	0	0	0	0	0	0	0	0	0	0	0	0	0	0	0	0	0	0	0	0	0	0	0	0	0	0	0	0	0	0	0	0	0	0	0	0.0166488	0	0	0	0.00158904	0	0	0	0	0	0
k__Bacteria;p__Actinobacteria;c__Actinobacteria;o__Actinomycetales;f__Micrococcaceae;g__Renibacterium;s__	0	0	0	0	0	0	0	0	0	0	0	0	0	0	0.00314147	0	0	0	0	0	0	0	0	0	0	0	0	0	0	0	0	0	0	0	0	0	0	0	0	0	0	0	0	0	0	0	0	0
k__Bacteria;p__Actinobacteria;c__Actinobacteria;o__Actinomycetales;f__Micrococcaceae;g__Rothia;s__mucilaginosa	0	0	0	0	0	0	0	0	0.0109158	0.00831756	0	0	0	0	0	0	0	0	0	0	0	0	0	0	0.00361402	0.00403218	0.00599245	0	0.00191142	0.00668947	0	0.00254712	0.00219317	0.00510198	0.000949298	0	0	0	0	0	0	0	0	0	0	0	0	0
k__Bacteria;p__Actinobacteria;c__Actinobacteria;o__Actinomycetales;f__Micromonosporaceae;Other;Other	0	0	0	0	0	0	0	0	0	0	0	0.00198535	0	0	0	0	0	0	0	0	0	0	0	0	0	0	0	0	0	0	0	0.0152827	0	0	0	0	0	0	0	0	0	0	0	0	0	0	0	0
k__Bacteria;p__Actinobacteria;c__Actinobacteria;o__Actinomycetales;f__Micromonosporaceae;g__;s__	0	0	0	0	0	0	0	0	0	0	0	0	0	0	0	0	0	0	0	0	0	0.00262286	0	0	0	0.00403218	0	0	0	0	0	0	0	0	0	0	0	0	0	0	0	0	0	0	0	0	0	0.0147798
k__Bacteria;p__Actinobacteria;c__Actinobacteria;o__Actinomycetales;f__Mycobacteriaceae;g__Mycobacterium;Other	0	0	0	0	0	0	0	0	0.00218317	0.00207939	0	0	0	0	0	0	0	0.00405712	0	0	0	0	0	0	0	0.00201609	0	0	0	0.000836183	0	0	0	0	0	0	0	0	0.00214151	0	0	0.00158904	0.00669053	0	0	0	0.00877886	0
k__Bacteria;p__Actinobacteria;c__Actinobacteria;o__Actinomycetales;f__Mycobacteriaceae;g__Mycobacterium;s__	0	0	0	0.00153955	0	0	0	0.00138053	0	0.00415878	0	0	0	0	0	0	0	0.00405712	0.00324257	0	0	0.00699429	0	0	0	0	0.00199748	0	0.00191142	0.000836183	0	0.00254712	0	0	0	0	0	0.0166488	0	0	0	0.00158904	0.0133811	0	0	0	0	0
k__Bacteria;p__Actinobacteria;c__Actinobacteria;o__Actinomycetales;f__Nakamurellaceae;g__;s__	0	0	0	0	0	0	0	0	0	0	0	0	0	0.00580776	0	0	0	0	0	0	0	0.000874286	0	0	0	0	0	0	0	0	0	0	0	0	0	0	0	0	0	0	0	0	0	0	0	0	0	0
k__Bacteria;p__Actinobacteria;c__Actinobacteria;o__Actinomycetales;f__Nocardiaceae;g__Rhodococcus;s__	0	0	0	0	0	0	0	0	0	0	0	0	0	0	0	0	0	0	0	0	0	0	0	0.00380604	0	0	0	0	0	0	0	0	0.00219317	0	0	0	0	0.013874	0	0	0	0	0	0	0	0	0	0
k__Bacteria;p__Actinobacteria;c__Actinobacteria;o__Actinomycetales;f__Nocardiaceae;g__Rhodococcus;s__fascians	0	0	0	0	0	0	0	0	0	0	0	0	0.00168788	0	0	0	0	0	0	0	0	0	0	0	0	0	0	0	0	0	0	0	0	0	0	0	0	0	0	0	0	0	0	0	0	0	0	0
k__Bacteria;p__Actinobacteria;c__Actinobacteria;o__Actinomycetales;f__Nocardioidaceae;g__;s__	0	0	0	0	0	0	0	0	0	0	0	0	0	0	0	0	0	0.00405712	0	0	0	0.00349715	0	0	0	0	0	0	0	0	0	0	0	0	0	0	0	0	0	0	0	0	0	0.0399398	0	0	0	0
k__Bacteria;p__Actinobacteria;c__Actinobacteria;o__Actinomycetales;f__Nocardioidaceae;g__Friedmanniella;s__	0	0	0	0	0	0	0	0	0	0	0	0	0	0	0	0	0	0	0	0	0	0	0	0	0	0	0	0	0	0	0	0	0	0	0	0	0	0	0	0	0	0	0	0.00614458	0	0	0	0
k__Bacteria;p__Actinobacteria;c__Actinobacteria;o__Actinomycetales;f__Nocardioidaceae;g__Nocardioides;s__	0	0	0	0	0	0	0	0	0	0	0	0	0	0	0	0	0	0	0	0	0	0	0	0	0	0	0	0	0	0	0	0	0	0	0	0	0	0	0	0	0	0	0	0	0	0	0.0292629	0
k__Bacteria;p__Actinobacteria;c__Actinobacteria;o__Actinomycetales;f__Nocardiopsaceae;Other;Other	0	0	0.0154571	0	0	0	0	0	0	0	0	0.00198535	0	0	0	0	0	0	0	0.00521567	0	0	0	0	0	0	0.00399497	0	0	0	0	0	0	0	0	0	0	0	0	0	0	0	0	0	0	0	0	0
k__Bacteria;p__Actinobacteria;c__Actinobacteria;o__Actinomycetales;f__Nocardiopsaceae;g__;s__	0	0	0	0	0	0	0	0.00276106	0	0	0	0	0	0	0	0	0	0	0.00243193	0	0	0	0	0	0	0	0	0	0	0	0	0	0	0	0	0	0	0	0	0	0	0	0	0	0	0	0	0
k__Bacteria;p__Actinobacteria;c__Actinobacteria;o__Actinomycetales;f__Nocardiopsaceae;g__Nocardiopsis;Other	0	0	0.00463714	0	0	0	0	0	0	0	0	0	0	0	0	0	0	0	0	0	0	0	0	0	0	0	0	0	0	0	0	0	0	0	0	0	0	0	0	0	0	0	0	0	0	0	0	0
k__Bacteria;p__Actinobacteria;c__Actinobacteria;o__Actinomycetales;f__Promicromonosporaceae;Other;Other	0	0	0	0	0	0	0	0	0	0	0	0.00794139	0	0	0	0	0	0	0	0	0	0	0	0	0	0	0	0	0	0	0	0	0	0	0	0	0	0	0	0	0	0	0	0	0	0	0	0
k__Bacteria;p__Actinobacteria;c__Actinobacteria;o__Actinomycetales;f__Promicromonosporaceae;g__Promicromonospora;s__	0	0	0	0	0	0	0	0	0	0	0	0	0	0	0	0	0	0	0	0	0	0	0	0	0	0	0	0	0	0	0	0.00764137	0	0	0	0	0	0	0	0	0	0	0	0	0	0	0	0
k__Bacteria;p__Actinobacteria;c__Actinobacteria;o__Actinomycetales;f__Promicromonosporaceae;g__Xylanimicrobium;Other	0	0	0	0	0.00633102	0	0	0	0	0	0	0	0	0	0	0	0	0	0	0	0	0	0	0	0	0	0	0	0	0	0	0	0	0	0	0	0	0	0	0	0	0	0	0	0	0	0	0
k__Bacteria;p__Actinobacteria;c__Actinobacteria;o__Actinomycetales;f__Promicromonosporaceae;g__Xylanimicrobium;s__	0	0	0	0	0.00316551	0	0	0	0	0	0	0	0	0	0	0	0	0	0	0	0	0	0	0	0	0	0	0	0	0	0	0	0	0	0	0	0	0	0	0	0	0	0	0	0	0	0	0
k__Bacteria;p__Actinobacteria;c__Actinobacteria;o__Actinomycetales;f__Propionibacteriaceae;g__Propionibacterium;s__acnes	0	0	0	0	0	0	0	0	0	0.00207939	0	0	0	0	0	0	0	0.00405712	0	0.00173856	0	0.000874286	0	0	0	0	0	0	0	0	0	0	0	0.00255099	0	0	0	0	0	0	0	0.00317808	0	0	0	0	0	0
k__Bacteria;p__Actinobacteria;c__Actinobacteria;o__Actinomycetales;f__Pseudonocardiaceae;g__;s__	0	0	0	0	0	0	0	0	0	0	0	0	0	0	0	0	0	0	0	0.00347711	0	0.00174857	0	0	0	0	0	0	0	0	0	0	0	0	0	0	0	0	0	0	0	0	0	0	0	0	0	0
k__Bacteria;p__Actinobacteria;c__Actinobacteria;o__Actinomycetales;f__Pseudonocardiaceae;g__Amycolatopsis;s__	0	0	0	0	0	0	0	0	0	0	0	0	0	0	0	0	0	0	0	0	0	0	0	0	0	0	0	0	0	0	0	0	0	0	0	0	0	0	0	0	0.00194822	0.00158904	0	0	0	0	0	0
k__Bacteria;p__Actinobacteria;c__Actinobacteria;o__Actinomycetales;f__Pseudonocardiaceae;g__Prauserella;s__rugosa	0	0	0	0	0	0	0	0	0	0	0	0	0	0	0	0	0	0	0	0	0	0.00524572	0	0	0	0	0.0159799	0	0	0	0	0	0	0	0	0	0	0	0	0	0	0	0	0	0	0	0	0
k__Bacteria;p__Actinobacteria;c__Actinobacteria;o__Actinomycetales;f__Pseudonocardiaceae;g__Pseudonocardia;s__	0	0	0	0	0	0	0	0	0	0	0	0	0	0	0	0	0	0	0	0	0	0.0174857	0	0	0	0	0	0	0	0	0	0	0	0	0	0	0	0	0	0	0	0	0	0	0	0	0	0
k__Bacteria;p__Actinobacteria;c__Actinobacteria;o__Actinomycetales;f__Pseudonocardiaceae;g__Saccharomonospora;s__	0	0	0	0	0	0	0	0	0	0	0	0	0	0	0	0	0	0	0	0.00521567	0	0	0	0	0	0	0.00599245	0	0	0	0	0	0	0	0	0	0	0	0	0	0	0	0	0	0	0	0	0
k__Bacteria;p__Actinobacteria;c__Actinobacteria;o__Actinomycetales;f__Pseudonocardiaceae;g__Saccharopolyspora;s__	0	0	0.262771	0	0.00474826	0	0	0	0	0	0	0	0	0	0	0	0	0	0	0	0	0	0	0	0	0	0	0	0	0	0	0	0	0	0	0	0	0	0	0	0	0.00635617	0	0	0	0	0	0
k__Bacteria;p__Actinobacteria;c__Actinobacteria;o__Actinomycetales;f__Pseudonocardiaceae;g__Thermobispora;s__bispora	0.00167255	0	0	0	0	0	0	0	0	0	0	0	0	0	0	0	0	0	0	0	0	0	0	0	0	0	0	0	0	0	0	0	0	0	0	0	0	0	0	0	0	0.00635617	0	0	0	0	0	0
k__Bacteria;p__Actinobacteria;c__Actinobacteria;o__Actinomycetales;f__Rarobacteraceae;g__Rarobacter;s__	0	0	0	0	0	0.00550237	0	0	0	0	0	0	0	0	0	0	0	0	0	0	0	0	0	0	0	0	0	0	0	0	0.00330349	0	0	0	0	0	0	0	0	0	0	0	0	0	0	0	0	0
k__Bacteria;p__Actinobacteria;c__Actinobacteria;o__Actinomycetales;f__Sporichthyaceae;g__;s__	0	0	0	0	0	0	0	0	0	0	0.00471817	0	0	0	0	0	0	0.00202856	0	0	0	0	0	0	0	0	0	0	0	0	0.00330349	0	0	0	0	0	0	0	0	0	0.00389643	0	0	0	0.00366596	0	0	0
k__Bacteria;p__Actinobacteria;c__Actinobacteria;o__Actinomycetales;f__Streptomycetaceae;Other;Other	0	0	0	0	0	0	0	0	0	0	0	0	0	0	0	0	0	0	0	0	0	0	0	0	0	0	0	0	0	0	0	0	0	0	0	0	0	0	0	0	0	0	0	0.341024	0	0	0	0
k__Bacteria;p__Actinobacteria;c__Actinobacteria;o__Actinomycetales;f__Streptomycetaceae;g__Streptomyces;Other	0	0	0	0	0	0	0	0.00690265	0	0	0	0	0	0	0	0	0	0	0	0	0	0	0	0	0	0	0	0	0	0	0	0	0	0	0	0	0	0	0	0	0	0	0	0	0	0	0	0
k__Bacteria;p__Actinobacteria;c__Actinobacteria;o__Actinomycetales;f__Streptomycetaceae;g__Streptomyces;s__	0	0	0	0	0	0	0	0	0	0	0	0	0	0	0	0.00974089	0.00639863	0	0	0.00695422	0	0.000874286	0	0	0	0	0.00399497	0	0	0	0	0	0	0	0	0.00375023	0	0	0	0	0	0.00317808	0	0.10753	0	0	0	0
k__Bacteria;p__Actinobacteria;c__Actinobacteria;o__Actinomycetales;f__Streptosporangiaceae;g__;s__	0	0	0	0	0	0	0	0	0	0	0	0	0	0	0	0	0	0	0	0	0	0	0	0	0	0	0	0	0	0	0	0	0.00657952	0	0	0	0	0	0	0	0	0	0	0	0	0	0	0
k__Bacteria;p__Actinobacteria;c__Actinobacteria;o__Actinomycetales;f__Streptosporangiaceae;g__Sphaerisporangium;s__	0	0	0	0	0	0	0	0	0	0	0	0	0	0	0	0	0	0	0.00243193	0	0	0	0	0	0	0	0	0	0	0	0	0	0	0	0	0	0	0	0	0	0	0	0	0	0	0	0	0
k__Bacteria;p__Actinobacteria;c__Actinobacteria;o__Actinomycetales;f__Tsukamurellaceae;g__Tsukamurella;s__	0	0	0	0	0	0	0	0	0	0	0	0	0	0	0	0	0	0	0	0	0	0.00262286	0	0	0	0	0	0	0	0	0	0	0	0	0	0	0	0	0	0	0	0	0	0	0	0	0	0
k__Bacteria;p__Actinobacteria;c__Actinobacteria;o__Actinomycetales;f__Williamsiaceae;g__Williamsia;s__	0	0	0	0	0	0	0	0	0	0.00207939	0	0	0	0	0	0	0	0	0	0	0	0.00174857	0	0	0	0	0	0	0	0	0	0	0	0	0	0	0	0	0	0	0	0	0	0	0	0	0	0
k__Bacteria;p__Actinobacteria;c__Actinobacteria;o__Bifidobacteriales;f__Bifidobacteriaceae;Other;Other	0	0.00542527	0	0.00153955	0.00158275	0	0	0	0	0	0	0.00198535	0.000843939	0	0.000785367	0	0	0	0	0	0.003255	0.00174857	0.0629129	0	0	0	0	0.00215332	0	0	0	0.00254712	0.00657952	0	0.00664509	0.0150009	0	0.0110992	0.00856604	0	0	0.00158904	0.00669053	0.00614458	0.00183298	0.00711288	0	0
k__Bacteria;p__Actinobacteria;c__Actinobacteria;o__Bifidobacteriales;f__Bifidobacteriaceae;g__Bifidobacterium;Other	6.83069	5.55005	3.94775	8.04723	7.89003	3.64623	2.75139	1.00364	0.936579	1.02098	0.863425	0.347436	0.00421969	0.00387184	0.0117805	1.73088	4.86865	0.430055	0.00243193	0.0382482	0.391413	0.0139886	0.12268	0.0228363	0.227683	0.739904	0.29363	0.406977	3.57819	5.38669	0.0726768	0.0356597	0.0438635	0.33673	0.0113916	0.896306	0.0256663	0.0480965	0	0.00790914	0.0701358	1.24263	0.18399	0.0706627	0.00916489	0.0177822	0.00877886	0
k__Bacteria;p__Actinobacteria;c__Actinobacteria;o__Bifidobacteriales;f__Bifidobacteriaceae;g__Bifidobacterium;s__	0.299386	0.233287	0.115929	0.230933	0.272234	0.203588	0.104759	0.0538406	0.0764109	0.0519848	0.0503271	0.0178681	0.000843939	0	0.00392684	0.0749299	0.21471	0.00608569	0	0	0.0203437	0	0	0.00380604	0.0108421	0.0483861	0.0139824	0.0107666	0.126154	0.277613	0	0	0.00657952	0.010204	0.0018986	0.0187512	0	0	0.00214151	0	0.00194822	0.0429041	0.0100358	0	0	0	0	0
k__Bacteria;p__Actinobacteria;c__Actinobacteria;o__Bifidobacteriales;f__Bifidobacteriaceae;g__Bifidobacterium;s__adolescentis	0.0501765	0.02577	0.03246	0.0230933	0.0522309	0.0568578	0.0116399	0.00828317	0.013099	0.00623817	0.00314545	0.00198535	0	0	0	0.00824229	0.0220397	0.00202856	0	0.00173856	0.000813749	0	0	0	0.00180701	0.00403218	0.00199748	0.00215332	0.0076457	0.0535157	0.00330349	0	0.00438635	0	0	0	0	0	0	0	0	0.00476713	0	0	0	0	0	0
k__Bacteria;p__Actinobacteria;c__Actinobacteria;o__Bifidobacteriales;f__Bifidobacteriaceae;g__Bifidobacterium;s__longum	0.00501765	0.00813791	0	0.0030791	0.00158275	0	0.00145499	0.00138053	0	0	0	0	0	0	0	0	0	0	0	0	0	0	0	0	0	0	0	0	0.00191142	0.00250855	0	0	0	0	0	0	0	0	0	0	0	0	0	0	0	0	0	0
k__Bacteria;p__Actinobacteria;c__Actinobacteria;o__Bifidobacteriales;f__Bifidobacteriaceae;g__Bifidobacterium;s__pseudolongum	4.42389	3.57119	2.57671	5.2668	5.37662	2.38069	1.70379	0.646088	0.539242	0.630056	0.608644	0.212432	0.00506363	0.00193592	0.0109951	1.14568	3.27184	0.22517	0.00243193	0.0139084	0.265282	0.00874286	0.0754954	0.0152242	0.164438	0.479829	0.167789	0.325151	2.28989	3.6374	0.0825873	0.020377	0.0241249	0.233415	0.00759438	0.720045	0.0213885	0.0249732	0	0.00711823	0.0175339	0.769096	0.100358	0.0430121	0.0109979	0.0124475	0.0117051	0
k__Bacteria;p__Actinobacteria;c__Coriobacteriia;o__Coriobacteriales;f__Coriobacteriaceae;g__;s__	0.033451	0.0271264	0.06492	0.0292515	5.91475	1.64154	1.85657	3.61837	1.47146	0.634214	0.910606	7.05394	1.6499	2.02691	0.961289	11.1338	7.65846	0.458455	4.49663	3.45625	2.00508	10.0674	1.07266	12.579	0.17528	0.362896	0.0898867	0.249785	0.0668999	2.46841	0.0264279	0.542537	0.311431	0.576523	0.0284789	0.547534	1.34106	0.464316	1.29776	0.29422	1.21764	3.96307	2.24467	1.8403	0.399589	0.773526	0.661341	0.137945
k__Bacteria;p__Actinobacteria;c__Coriobacteriia;o__Coriobacteriales;f__Coriobacteriaceae;g__Adlercreutzia;s__	1.18416	1.13931	4.32182	1.2378	1.64923	2.38252	1.06505	2.25578	1.20293	1.92552	2.41413	1.81461	2.11829	3.16136	0.141366	0.629412	0.319932	0.0101428	5.20513	3.92392	0.989519	3.33977	0.578798	2.68707	0.504156	2.65519	0.199748	0.992679	0.149091	2.41323	0.584718	1.7295	13.8455	0.372444	0.328457	0.592537	0.611712	0.899959	0.250557	0.14711	0.465624	0.657863	2.16439	0.703555	0.174133	0.643716	0.216545	0.588728
k__Bacteria;p__Actinobacteria;c__Coriobacteriia;o__Coriobacteriales;f__Coriobacteriaceae;g__Atopobium;s__	0	0.00406896	0	0	0	0	0	0	0	0	0	0	0	0	0	0	0	0	0	0	0	0	0	0	0	0	0	0	0	0	0	0	0	0	0	0	0	0	0	0	0	0	0	0	0	0	0	0
k__Bacteria;p__Actinobacteria;c__Coriobacteriia;o__Coriobacteriales;f__Coriobacteriaceae;g__Collinsella;s__	0	0.00135632	0	0	0.00474826	0	0	0	0	0	0	0	0	0	0	0	0	0	0	0	0	0	0	0	0	0	0	0	0	0	0	0	0	0	0	0	0	0	0	0	0	0	0	0	0	0	0	0
k__Bacteria;p__Actinobacteria;c__Coriobacteriia;o__Coriobacteriales;f__Coriobacteriaceae;g__Collinsella;s__aerofaciens	0.00836274	0.00678159	0.00154571	0.0030791	0.00158275	0.00366824	0.00436497	0.00828317	0.0065495	0.010397	0.00314545	0.00198535	0	0	0	0	0	0	0	0	0	0	0	0	0.00903506	0.0141126	0.0159799	0	0.00191142	0	0	0	0	0.00127549	0.000949298	0	0.00213885	0	0	0.0055364	0	0	0	0	0	0	0	0
k__Bacteria;p__Actinobacteria;c__Coriobacteriia;o__Coriobacteriales;f__Coriobacteriaceae;g__Eggerthella;s__lenta	0.00167255	0	0	0	0	0.00183412	0.00290998	0	0	0	0	0	0	0	0	0	0	0	0	0	0	0	0	0	0	0	0	0	0	0	0	0	0	0	0	0	0	0	0	0	0	0	0	0	0	0	0	0
k__Bacteria;p__Actinobacteria;c__Coriobacteriia;o__Coriobacteriales;f__Coriobacteriaceae;g__Slackia;s__	0	0.00135632	0	0	0	0	0	0.0096637	0	0.00207939	0	0	0	0	0	0	0	0	0	0	0	0	0	0	0	0	0.00199748	0	0.00191142	0.000836183	0	0.00254712	0	0.00255099	0	0	0	0	0	0	0	0	0	0	0	0	0	0
k__Bacteria;p__Actinobacteria;c__Thermoleophilia;o__Gaiellales;f__Gaiellaceae;g__;s__	0	0	0	0	0	0	0	0	0	0	0	0	0	0	0	0	0	0	0	0	0	0	0	0	0	0	0	0	0	0	0	0	0	0	0	0	0	0	0	0	0	0.00794521	0	0	0	0	0	0
k__Bacteria;p__Actinobacteria;c__Thermoleophilia;o__Solirubrobacterales;Other;Other;Other	0	0	0	0	0	0	0	0	0	0	0	0	0	0	0	0	0.00213288	0	0	0	0.003255	0	0	0	0	0	0	0	0	0	0	0	0	0	0	0	0	0	0	0	0	0	0	0	0	0	0	0
k__Bacteria;p__Actinobacteria;c__Thermoleophilia;o__Solirubrobacterales;f__;g__;s__	0	0	0	0	0	0	0	0	0	0	0	0	0	0	0	0	0.00284384	0	0	0	0	0	0	0	0	0	0	0	0	0	0	0	0	0	0	0	0	0	0	0	0	0.00476713	0	0	0	0	0	0
k__Bacteria;p__Actinobacteria;c__Thermoleophilia;o__Solirubrobacterales;f__Solirubrobacteraceae;g__;s__	0	0	0	0	0	0	0	0	0	0	0	0	0	0	0	0	0.00142192	0	0	0	0	0	0	0	0	0	0	0	0	0	0	0	0	0	0	0	0	0	0	0	0	0	0	0	0	0	0	0
k__Bacteria;p__BRC1;c__PRR-11;o__;f__;g__;s__	0	0	0	0	0	0	0	0	0	0	0.00471817	0	0	0	0	0	0	0	0	0	0	0	0	0	0	0	0	0	0	0	0	0	0	0	0	0	0	0	0	0	0	0	0	0	0	0	0	0
k__Bacteria;p__Bacteroidetes;c__Bacteroidia;o__Bacteroidales;Other;Other;Other	0	0	0	0	0	0	0	0	0	0	0	0	0	0	0	0	0	0	0	0	0.000813749	0	0	0	0	0	0	0	0	0	0	0	0	0	0	0	0	0	0	0	0	0	0	0	0.00183298	0	0	0
k__Bacteria;p__Bacteroidetes;c__Bacteroidia;o__Bacteroidales;f__;g__;s__	0.0033451	0	0	0	0	0	0	0	0.0109158	0.00207939	0.00157272	0	0.0194106	0	0.306293	0.0052451	0.00142192	0.00405712	0.011349	0.00173856	1.42976	0.0148629	1.03806	0.228363	0	0.00201609	0	0	0	0	0	0	0	0.00127549	0	0	0	0.00184986	0	0.00711823	1.91899	0.839014	0.137156	0.129036	3.68062	0.138701	0.371638	0.0123165
k__Bacteria;p__Bacteroidetes;c__Bacteroidia;o__Bacteroidales;f__Bacteroidaceae;g__Bacteroides;s__	0.0451588	0.00678159	0.00309143	0.00461865	0.0174103	0.00550237	0.00145499	0.125628	0.122257	0.17051	0.00943634	0.039707	0.0244742	0.0135514	0.0785367	0.0382143	0.0127973	0.0202856	0.147537	0.726716	1.31665	0.364577	3.24001	0.624191	0.428262	0.0806435	0.0699119	0.103359	0.0248485	0.00668947	0.0330349	0.570555	0.27634	0.142855	0.277195	0.446278	0.0577491	0.294129	0.00428302	0.0102819	0.25132	0.543452	0.210752	0.10753	6.11665	0.336084	0.763761	0.0197064
k__Bacteria;p__Bacteroidetes;c__Bacteroidia;o__Bacteroidales;f__Bacteroidaceae;g__Bacteroides;s__acidifaciens	0	0.00135632	0	0	0	0	0	0.00276106	0.00218317	0.00623817	0	0	0	0	0	0	0.00213288	0	0	0	0.0618449	0	0	0	0.0379472	0	0.00399497	0	0	0	0.00330349	0.0101885	0.0460567	0	0.0218339	0.0112507	0.00213885	0.0027748	0	0	0.16365	0.0143014	0	0.0245783	0.0128309	0.00711288	0.0117051	0
k__Bacteria;p__Bacteroidetes;c__Bacteroidia;o__Bacteroidales;f__Bacteroidaceae;g__Bacteroides;s__caccae	0	0	0	0	0	0	0	0.00276106	0.00218317	0.00207939	0	0	0	0	0	0	0	0	0	0	0	0	0	0	0.00180701	0.00403218	0	0	0	0	0	0	0	0.00127549	0	0	0	0	0	0	0	0	0	0	0	0	0	0
k__Bacteria;p__Bacteroidetes;c__Bacteroidia;o__Bacteroidales;f__Bacteroidaceae;g__Bacteroides;s__eggerthii	0	0	0	0	0	0	0	0.023469	0	0	0	0	0	0	0	0	0	0	0	0	0	0	0	0	0	0	0	0	0	0	0	0	0	0	0	0	0	0	0	0	0	0	0	0	0	0	0	0
k__Bacteria;p__Bacteroidetes;c__Bacteroidia;o__Bacteroidales;f__Bacteroidaceae;g__Bacteroides;s__fragilis	0.00501765	0.00406896	0	0	0	0	0	0.00138053	0.00218317	0	0	0	0	0	0	0	0	0	0	0	0	0	0.0314564	0	0.0126491	0	0.00199748	0	0	0	0	0.00509424	0.00438635	0	0.00569579	0.00375023	0.00855542	0.0249732	0.00214151	0	0.00194822	0.00158904	0	0.0276506	0.00183298	0	0	0
k__Bacteria;p__Bacteroidetes;c__Bacteroidia;o__Bacteroidales;f__Bacteroidaceae;g__Bacteroides;s__ovatus	0	0	0	0	0	0	0	0.00690265	0.00218317	0.00415878	0	0	0	0	0	0	0	0	0	0	0	0	0	0	0	0.00604827	0.00399497	0	0	0	0	0	0.00438635	0.00127549	0	0	0	0	0	0	0.00389643	0	0	0	0	0	0	0
k__Bacteria;p__Bacteroidetes;c__Bacteroidia;o__Bacteroidales;f__Bacteroidaceae;g__Bacteroides;s__uniformis	0	0	0	0	0	0	0	0	0.00218317	0.00207939	0	0	0	0	0.00314147	0	0	0	0	0	0.000813749	0	0	0	0.00180701	0.00604827	0.00199748	0.00645995	0	0	0	0	0	0	0	0	0	0.0166488	0	0	0	0	0	0	0.00549894	0	0	0
k__Bacteria;p__Bacteroidetes;c__Bacteroidia;o__Bacteroidales;f__Porphyromonadaceae;g__Parabacteroides;s__	0.00501765	0	0	0	0	0	0	0	0.039297	0.0228733	0.00314545	0	0	0	0.0306293	0.0044958	0	0	0.0170235	0.191241	0.971616	0.0323486	0.58509	0.0190302	0.00722804	0.0201609	0.00599245	0.206718	0	0.000836183	0.00660698	0	0.00219317	0.00127549	0	0.00375023	0.00213885	0.0702949	0	0	1.48064	0.311452	0.147192	0.298012	0.824841	0.0835764	0.175577	0.0123165
k__Bacteria;p__Bacteroidetes;c__Bacteroidia;o__Bacteroidales;f__Porphyromonadaceae;g__Parabacteroides;s__distasonis	0	0	0	0	0	0	0	0.0552212	0.0349307	0.0270321	0.00314545	0.0039707	0	0	0	0	0	0	0.0121596	0.093882	0.00406875	0	0	0	0.00903506	0.0181448	0.0219723	0.00645995	0.0076457	0	0.00330349	0	0.00219317	0.00127549	0	0.00375023	0	0.0027748	0	0	0	0.00158904	0	0	0	0	0	0
k__Bacteria;p__Bacteroidetes;c__Bacteroidia;o__Bacteroidales;f__Porphyromonadaceae;g__Porphyromonas;s__	0	0	0	0	0.00316551	0	0	0	0	0	0	0	0	0	0	0	0	0	0	0	0	0	0	0	0	0	0	0	0	0	0	0	0	0	0	0	0	0	0	0	0	0	0.050179	0	0	0	0	0
k__Bacteria;p__Bacteroidetes;c__Bacteroidia;o__Bacteroidales;f__Prevotellaceae;g__;s__	0	0	0	0	0	0	0	0	0	0	0	0	0	0	0	0	0	0	0.000810642	0	0.00976499	0.000874286	0.00943693	0.00380604	0	0	0	0	0	0	0	0	0	0	0	0	0	0.00184986	0	0	0.0311715	0.0270137	0	0	0.0146638	0	0.00292629	0
k__Bacteria;p__Bacteroidetes;c__Bacteroidia;o__Bacteroidales;f__Prevotellaceae;g__Prevotella;s__	0.0267608	0	0	0.00923731	0	0.00183412	0.0130949	0	0.00218317	0.010397	0	0	0	0	0	0	0	0	0	0	0.0122062	0.00699429	0	0	0	0.00201609	0.00199748	0	0	0	0.00330349	0.0127356	0	0	0.000949298	0.00375023	0	0.096193	0	0	0.0194822	0.0556165	0.0267621	0.0675904	0.0348266	0.0142258	0.108273	0
k__Bacteria;p__Bacteroidetes;c__Bacteroidia;o__Bacteroidales;f__Prevotellaceae;g__Prevotella;s__copri	0	0	0	0	0	0	0	0.0110442	0.0240148	0.00207939	0	0.0039707	0	0	0	0	0	0	0	0	0	0	0	0	0	0.0120965	0.00599245	0	0.00955712	0	0.00330349	0.00254712	0.00657952	0	0.000949298	0	0	0	0	0	0	0	0.0100358	0	0	0.00177822	0	0
k__Bacteria;p__Bacteroidetes;c__Bacteroidia;o__Bacteroidales;f__Prevotellaceae;g__Prevotella;s__melaninogenica	0	0	0	0	0	0	0	0	0	0	0	0	0	0	0	0	0	0	0	0	0	0.00262286	0	0	0	0	0	0	0	0	0	0	0	0	0	0	0	0	0	0	0	0	0	0	0	0	0	0
k__Bacteria;p__Bacteroidetes;c__Bacteroidia;o__Bacteroidales;f__Prevotellaceae;g__Prevotella;s__nanceiensis	0	0	0	0	0	0	0.00436497	0	0	0	0	0	0	0	0	0	0	0	0	0	0	0	0	0	0	0	0	0	0	0	0	0	0	0	0	0	0	0	0	0	0	0	0	0	0	0	0	0
k__Bacteria;p__Bacteroidetes;c__Bacteroidia;o__Bacteroidales;f__Prevotellaceae;g__Prevotella;s__stercorea	0	0	0	0	0	0	0	0	0	0.00207939	0	0	0	0	0	0	0	0	0	0	0	0	0	0	0.00180701	0.00201609	0	0	0	0	0	0	0	0.00127549	0	0	0	0	0	0	0	0	0	0	0	0	0	0
k__Bacteria;p__Bacteroidetes;c__Bacteroidia;o__Bacteroidales;f__Rikenellaceae;Other;Other	0	0	0	0	0	0	0	0	0	0	0	0	0	0	0	0	0	0	0	0	0.000813749	0	0	0	0	0	0	0	0	0	0	0	0	0	0	0	0	0	0	0	0.00194822	0	0	0	0	0	0	0
k__Bacteria;p__Bacteroidetes;c__Bacteroidia;o__Bacteroidales;f__Rikenellaceae;g__;s__	0.018398	0.0108505	0.00772857	0	0.0110793	0.104545	0.00581996	0.0483185	0.0567624	0.224574	0.00157272	0.0039707	0.0346015	0.0367825	0.0644001	0.0059944	0	0	0.261027	0.031294	2.05146	0.176606	2.08871	0.102763	3.98085	0.1754	0.125841	0.7795	0.189231	0.0200684	0.0396419	0.624045	0.151329	0.00382648	0.520215	0.0412526	0.352911	0.219209	0.0406887	0.0189819	1.08516	0.476713	0.18399	0.165904	3.52848	0.167153	0.869107	0.0541925
k__Bacteria;p__Bacteroidetes;c__Bacteroidia;o__Bacteroidales;f__Rikenellaceae;g__AF12;s__	0.0167255	0.00135632	0.0293686	0.0153955	0.077555	0.0586919	0	0.0138053	0.013099	0.0561436	0.00157272	0.0218388	0.014347	0	0.0133512	0	0	0	0	0	0	0	0.044039	0.00761209	1.58113	0.100804	0.0699119	0.499569	0.0936598	0.0844545	0.0264279	0.603668	0.517589	0.0178569	0.444271	0.0112507	0.132609	0	0	0	0	0	0.0334526	0	0.263949	0.0284515	0	0
k__Bacteria;p__Bacteroidetes;c__Bacteroidia;o__Bacteroidales;f__S24-7;g__;s__	28.4216	8.00363	15.3304	11.1648	6.54469	33.8469	2.02535	6.23447	1.9976	3.32079	5.62406	6.43253	6.61057	19.607	1.40738	7.66234	5.69905	0.334713	13.1283	2.78864	6.15276	11.5808	4.68701	9.73205	8.46765	27.9773	8.03787	6.99612	8.44085	18.963	0.891943	11.5385	27.2502	1.76528	2.0296	3.2102	3.87133	7.64272	5.33022	1.1927	8.2994	6.01135	2.95387	2.5838	4.01056	0.805534	2.1596	0.835058
k__Bacteria;p__Bacteroidetes;c__Bacteroidia;o__Bacteroidales;f__[Barnesiellaceae];g__;s__	0	0	0	0	0	0	0	0	0.00218317	0.00623817	0.00157272	0	0	0	0	0	0	0	0	0	0	0	0	0	0.00180701	0.00403218	0	0	0	0	0.00330349	0	0	0	0	0	0	0	0	0	0	0	0	0	0	0	0	0
k__Bacteria;p__Bacteroidetes;c__Bacteroidia;o__Bacteroidales;f__[Odoribacteraceae];g__Butyricimonas;s__	0	0	0	0	0	0	0.00145499	0	0	0.00207939	0	0	0	0	0	0	0	0	0	0	0	0	0	0	0.00180701	0	0	0	0	0	0	0	0	0	0	0	0	0	0	0	0	0	0	0	0	0	0	0
k__Bacteria;p__Bacteroidetes;c__Bacteroidia;o__Bacteroidales;f__[Odoribacteraceae];g__Odoribacter;s__	0.0301059	0	0.0170029	0.100071	0.0379861	0.0862037	0.0451047	0.023469	0.013099	0.0603023	0.0597635	0.0615458	0.0438848	0.0658213	0.0439806	0.0119888	0.000710959	0	0.282914	0.154731	1.11891	0.145132	1.57911	0.0723148	1.07698	0.0524183	0.0179773	0.208872	0.0172028	0.00418092	0.013214	0.226694	0.153522	0.113519	0.0825889	0.0412526	0.134748	0.0860187	0.0364057	0.018191	1.77288	0.986795	0.485063	0.135181	8.76531	0.337862	1.02713	0.118238
k__Bacteria;p__Bacteroidetes;c__Bacteroidia;o__Bacteroidales;f__[Paraprevotellaceae];g__Paraprevotella;s__	0	0	0	0	0	0	0	0.0110442	0	0.00207939	0	0	0	0	0	0	0	0	0	0	0	0	0	0	0	0.00201609	0	0	0	0	0	0	0	0.00127549	0	0	0	0	0	0	0	0	0	0	0	0	0	0
k__Bacteria;p__Bacteroidetes;c__Bacteroidia;o__Bacteroidales;f__[Paraprevotellaceae];g__[Prevotella];s__	0	0	0	0	0	0.00550237	0	0.00138053	0.00436634	0.00623817	0	0.00198535	0.013503	0	0.0667562	0.0269748	0	0	0.0648514	0.0399868	0.693314	0.0297257	2.39698	0.20172	0.00180701	0.00201609	0.00199748	0	0.00191142	0.00585328	0	0	0	0	0	0	0	0.0397721	0	0	2.42943	2.14203	0.234169	0.224277	0.863333	0.0693506	0.122904	0
k__Bacteria;p__Bacteroidetes;c__Cytophagia;o__Cytophagales;f__Cyclobacteriaceae;g__;s__	0	0	0	0	0	0	0	0	0	0	0	0	0.00168788	0	0	0	0	0	0	0	0	0	0.0283108	0	0	0	0	0	0	0	0	0	0	0	0	0	0	0	0	0	0	0	0	0	0	0	0	0
k__Bacteria;p__Bacteroidetes;c__Cytophagia;o__Cytophagales;f__Cyclobacteriaceae;g__Algoriphagus;Other	0	0	0	0	0	0	0	0	0	0	0	0	0	0	0	0	0	0	0	0	0	0	0.0408934	0	0	0	0	0	0	0	0	0	0	0	0	0	0	0	0	0	0	0	0	0	0	0	0	0
k__Bacteria;p__Bacteroidetes;c__Cytophagia;o__Cytophagales;f__Cytophagaceae;g__;s__	0	0	0	0.00461865	0	0	0	0	0	0	0	0.00198535	0	0	0	0	0	0	0	0	0	0	0	0	0	0	0.00199748	0	0	0	0	0	0	0	0	0.0150009	0	0	0	0	0.00584465	0	0	0	0	0	0.0175577	0
k__Bacteria;p__Bacteroidetes;c__Cytophagia;o__Cytophagales;f__Cytophagaceae;g__Adhaeribacter;s__	0	0	0.0139114	0	0	0	0	0	0	0	0	0	0	0	0	0	0	0	0	0	0	0	0	0	0	0	0	0	0	0	0	0	0	0	0	0	0	0	0	0	0	0	0	0	0	0	0	0
k__Bacteria;p__Bacteroidetes;c__Cytophagia;o__Cytophagales;f__Cytophagaceae;g__Hymenobacter;s__	0	0	0	0	0	0	0	0	0	0	0	0	0.00168788	0	0	0	0	0	0	0	0	0.00349715	0	0	0	0	0	0	0	0	0	0	0	0	0	0	0	0	0	0	0	0	0	0	0	0	0.0146314	0
k__Bacteria;p__Bacteroidetes;c__Cytophagia;o__Cytophagales;f__Cytophagaceae;g__Spirosoma;s__	0	0	0	0	0	0	0	0	0	0	0	0	0	0	0	0	0	0	0	0	0	0	0	0	0	0	0	0	0	0	0	0	0	0	0	0	0	0	0	0	0	0	0	0	0.00733192	0	0	0
k__Bacteria;p__Bacteroidetes;c__Flavobacteriia;o__Flavobacteriales;f__Flavobacteriaceae;g__Aequorivita;s__	0	0	0	0	0	0	0	0	0	0	0	0	0.00168788	0	0	0	0	0	0	0	0	0	0	0	0	0	0	0	0	0	0	0	0	0	0	0	0	0	0	0	0	0	0	0	0	0	0	0
k__Bacteria;p__Bacteroidetes;c__Flavobacteriia;o__Flavobacteriales;f__Flavobacteriaceae;g__Flavobacterium;s__	0.00167255	0	0	0	0	0	0	0.00276106	0	0.00207939	0	0	0.014347	0.00193592	0.0047122	0	0	0	0.00243193	0	0	0	0	0	0	0.00201609	0.00199748	0	0	0	0	0	0	0	0	0	0	0	0	0	0	0.00476713	0	0.0122892	0	0	0.0234103	0
k__Bacteria;p__Bacteroidetes;c__Flavobacteriia;o__Flavobacteriales;f__[Weeksellaceae];g__;s__	0	0	0	0	0	0.0990426	0	0	0	0	0	0	0	0	0	0	0	0	0	0	0	0	0	0	0	0	0	0	0	0	0.125533	0	0	0	0	0	0	0	0	0	0	0	0	0	0	0	0	0
k__Bacteria;p__Bacteroidetes;c__Flavobacteriia;o__Flavobacteriales;f__[Weeksellaceae];g__Chryseobacterium;s__	0	0	0	0	0.0237413	0.0201753	0	0.00276106	0.00436634	0	0	0.0039707	0	0	0.000785367	0	0.00213288	0	0	0	0	0.0148629	0.0377477	0	0.00361402	0	0	0	0.0076457	0	0.0165175	0	0	0	0	0	0	0	0	0	0.00779287	0.00158904	0	0.00614458	0	0	0	0
k__Bacteria;p__Bacteroidetes;c__Flavobacteriia;o__Flavobacteriales;f__[Weeksellaceae];g__Cloacibacterium;s__	0	0	0	0.00769776	0	0.00183412	0	0.0193274	0	0.0145557	0	0	0.00337576	0	0	0	0	0	0	0	0	0.000874286	0.0692042	0	0	0	0	0	0	0	0.759803	0	0	0	0	0	0	0.00184986	0	0	0	0	0	0	0	0	0.0117051	0.0024633
k__Bacteria;p__Bacteroidetes;c__Flavobacteriia;o__Flavobacteriales;f__[Weeksellaceae];g__Elizabethkingia;s__meningoseptica	0	0	0	0	0	0	0	0	0	0	0	0	0	0	0	0	0	0	0	0	0	0	0	0	0	0	0	0	0	0	0.00991048	0	0	0	0	0	0	0	0	0	0	0	0	0	0	0	0	0
k__Bacteria;p__Bacteroidetes;c__Flavobacteriia;o__Flavobacteriales;f__[Weeksellaceae];g__Wautersiella;s__	0	0	0	0	0	0	0	0	0	0	0	0	0	0	0	0	0	0	0	0	0	0	0	0	0	0	0	0	0	0	0.019821	0	0	0	0	0	0	0	0	0	0	0	0	0	0	0	0	0
k__Bacteria;p__Bacteroidetes;c__Sphingobacteriia;o__Sphingobacteriales;f__;g__;s__	0	0	0	0	0	0	0	0	0	0.00623817	0	0	0	0	0	0	0	0	0	0	0	0	0	0	0	0	0	0	0	0	0	0	0	0	0	0	0	0	0	0	0	0	0	0	0	0	0	0
k__Bacteria;p__Bacteroidetes;c__Sphingobacteriia;o__Sphingobacteriales;f__Sphingobacteriaceae;g__;s__	0	0	0	0	0	0	0	0.0165663	0	0	0	0	0.00168788	0	0	0	0	0	0	0	0	0	0	0	0	0	0	0	0	0	0.0396419	0	0	0	0	0	0.00641656	0	0	0	0	0	0	0	0	0	0	0
k__Bacteria;p__Bacteroidetes;c__[Saprospirae];o__[Saprospirales];f__Chitinophagaceae;g__Flavisolibacter;s__	0	0	0	0	0	0	0	0	0	0	0	0	0	0	0	0	0	0	0	0	0	0	0	0	0	0	0	0	0	0	0	0	0	0	0	0	0	0	0	0	0	0	0	0.218133	0	0	0	0
k__Bacteria;p__Bacteroidetes;c__[Saprospirae];o__[Saprospirales];f__Chitinophagaceae;g__Sediminibacterium;s__	0	0	0	0	0	0	0	0	0.00218317	0	0	0.00198535	0	0	0	0.000749299	0	0	0	0	0	0	0	0	0	0	0	0	0	0	0	0	0	0	0	0	0	0	0	0	0	0.00158904	0	0	0	0	0	0
k__Bacteria;p__Bacteroidetes;c__[Saprospirae];o__[Saprospirales];f__Chitinophagaceae;g__Segetibacter;s__	0	0	0	0	0	0	0	0	0	0	0	0	0	0	0	0	0	0	0	0	0	0	0	0	0	0	0	0	0	0	0	0	0	0	0	0	0	0	0	0	0	0	0	0.0829519	0	0	0	0
k__Bacteria;p__Bacteroidetes;c__[Saprospirae];o__[Saprospirales];f__Saprospiraceae;g__;s__	0	0	0	0	0	0	0	0	0	0	0	0	0	0	0	0	0	0	0	0	0	0.00437143	0	0	0	0	0	0	0	0	0	0	0	0	0	0	0	0	0	0	0	0	0	0	0	0	0	0
k__Bacteria;p__Chlamydiae;c__Chlamydiia;o__Chlamydiales;f__;g__;s__	0	0	0	0	0	0	0	0	0	0	0	0	0	0	0	0	0	0	0	0	0	0	0	0	0.00180701	0	0.00199748	0	0	0	0	0	0	0	0	0	0	0	0	0	0	0	0	0	0	0	0	0
k__Bacteria;p__Chlamydiae;c__Chlamydiia;o__Chlamydiales;f__Parachlamydiaceae;g__;s__	0	0	0	0	0.00633102	0	0	0	0	0	0	0	0	0	0	0	0	0	0	0	0	0	0	0	0	0	0	0	0	0	0	0	0	0	0	0	0	0	0	0	0	0	0	0	0	0	0	0
k__Bacteria;p__Chloroflexi;c__Ellin6529;o__;f__;g__;s__	0	0	0	0	0	0	0	0	0	0	0	0	0	0	0	0	0	0.0182571	0	0	0	0	0	0	0	0	0	0	0	0	0	0	0	0	0	0	0	0	0	0	0	0	0	0	0	0	0	0
k__Bacteria;p__Chloroflexi;c__Gitt-GS-136;o__;f__;g__;s__	0	0	0	0	0	0	0	0	0	0	0	0	0	0	0	0	0	0	0	0	0	0.000874286	0	0	0	0	0	0.00215332	0	0	0	0	0	0	0	0	0	0	0	0	0	0	0	0	0	0	0	0
k__Bacteria;p__Chloroflexi;c__S085;o__;f__;g__;s__	0	0	0	0	0	0	0	0	0	0	0	0	0	0	0	0	0	0	0	0	0	0.00524572	0	0	0	0	0	0	0	0	0	0	0	0	0	0	0	0	0	0	0	0	0	0	0	0	0	0
k__Bacteria;p__Chloroflexi;c__Thermomicrobia;o__JG30-KF-CM45;f__;g__;s__	0	0	0	0	0	0	0	0	0	0	0	0	0	0	0	0	0	0.0263713	0	0	0	0	0	0	0	0	0	0	0	0	0	0	0	0	0	0	0	0	0	0	0	0	0	0	0	0	0	0
k__Bacteria;p__Cyanobacteria;c__4C0d-2;o__MLE1-12;f__;g__;s__	0	0	0	0	0	0	0.00145499	0	0	0	0	0	0	0	0	0	0	0	0	0	0	0	0	0	0	0	0	0	0	0	0	0	0	0	0	0	0	0	0	0	0	0	0	0	0.00183298	0	0	0
k__Bacteria;p__Cyanobacteria;c__4C0d-2;o__YS2;f__;g__;s__	0.00167255	0	0	0	0	0	0	0	0	0	0	0	0	0.00193592	0	0	0	0	0.00162128	0.00695422	0	0	0	0.0418665	0	0	0	0.00645995	0	0	0	0	0	0	0	0	0	0	0	0	0	0.00158904	0	0	0.124643	0.0373426	0	0
k__Bacteria;p__Cyanobacteria;c__Chloroplast;o__Streptophyta;f__;g__;s__	0	0	0.01082	0.00153955	0.012662	0	0.00436497	0	0.00218317	0	0	0.00198535	0	0	0	0	0	0	0.00162128	0.00347711	0	0.00174857	0	0	0.00180701	0.00201609	0.0139824	0	0	0	0.102408	0	0	0	0	0.0450028	0	0.0194236	0	0	0	0.00158904	0.0100358	0	0	0	0	0.0172431
k__Bacteria;p__Deferribacteres;c__Deferribacteres;o__Deferribacterales;f__Deferribacteraceae;g__Mucispirillum;s__schaedleri	0.0033451	0	0.174666	0	0.269068	0.500715	0.0116399	0	0.00218317	0.00207939	0	0.0555897	0.118995	0.00387184	0.381688	0	0	0	0.0210767	0.0556338	0.0480112	0.0340972	0.456118	0.0152242	0.00180701	0.00806435	0.00599245	4.21619	2.04331	0.00250855	0	0.753948	0.491271	0.420913	1.52267	0.0975061	0.00641656	0.0730697	0.0107076	0	1.55078	0.0826302	0.217442	0.116747	5.64924	0.304076	0.711088	0.0468026
k__Bacteria;p__Firmicutes;Other;Other;Other;Other;Other	0.00167255	0	0	0.00153955	0	0	0	0	0.00218317	0	0	0.0039707	0	0	0	0.0022479	0.000710959	0.00405712	0	0	0.000813749	0.00174857	0	0	0	0.00403218	0.00199748	0	0	0	0	0.00254712	0	0	0	0	0	0	0	0.00632731	0	0	0	0	0	0.00177822	0	0
k__Bacteria;p__Firmicutes;c__Bacilli;Other;Other;Other;Other	0	0.00135632	0.00618286	0.0030791	0	0	0	0.00138053	0.00218317	0.00207939	0	0.0039707	0.0194106	0.00193592	0.000785367	0.00824229	0.0127973	0.00405712	0.000810642	0.00173856	0	0.000874286	0	0	0	0.00201609	0.00399497	0	0.0707227	0.00250855	0.013214	0	0	0	0	0	0.00213885	0.000924932	0.0406887	0.170047	0.0155857	0.00476713	0.00669053	0.00921687	0.00366596	0.072907	0.00585257	0
k__Bacteria;p__Firmicutes;c__Bacilli;o__Bacillales;Other;Other;Other	0.0033451	0.0108505	0.262771	0.0107769	0.00474826	0	0	0.00414159	0.0065495	0.00415878	0.00786361	0.0138974	0	0	0.0094244	0.0014986	0.000710959	0.00608569	0.00243193	0.00869278	0.000813749	0.00174857	0.0188739	0	0.0126491	0.00403218	0.00199748	0.0839793	0.0535199	0.0217408	0.0495524	0.00509424	0	0.0114794	0.089234	0.048753	0	0.00184986	0.128491	0.018191	0.00779287	0.00476713	0.0434884	0.0245783	0.00183298	0.0444555	0.00877886	0.0024633
k__Bacteria;p__Firmicutes;c__Bacilli;o__Bacillales;f__;g__;s__	0.00167255	0.00406896	0.00309143	0	0	0	0	0	0	0	0.00943634	0.00595604	0	0	0	0	0	0	0	0	0	0	0	0	0	0	0	0	0.0172028	0.0175598	0	0	0	0.00892846	0	0	0	0	0.00428302	0	0	0	0	0	0	0	0	0
k__Bacteria;p__Firmicutes;c__Bacilli;o__Bacillales;f__Alicyclobacillaceae;g__Alicyclobacillus;s__	0	0	0	0	0	0	0	0	0	0	0	0	0	0	0	0	0	0	0	0	0.00244125	0	0	0	0	0	0	0	0	0	0	0	0	0	0	0	0	0	0	0	0	0	0	0	0	0	0	0
k__Bacteria;p__Firmicutes;c__Bacilli;o__Bacillales;f__Alicyclobacillaceae;g__Alicyclobacillus;s__acidocaldarius	0	0	0	0	0	0.00183412	0	0	0	0	0	0	0	0	0	0	0	0	0	0	0	0	0	0	0	0	0	0	0	0	0	0	0	0	0	0	0	0	0	0	0	0	0	0	0	0	0.0234103	0
k__Bacteria;p__Firmicutes;c__Bacilli;o__Bacillales;f__Bacillaceae;Other;Other	0	0.00271264	0.00309143	0.0061582	0	0	0	0	0	0.00207939	0	0.0039707	0.00168788	0	0	0	0.00213288	0	0	0	0	0	0	0	0	0	0	0	0	0	0	0	0	0	0	0	0	0	0	0.00790914	0	0	0	0	0	0	0	0.0024633
k__Bacteria;p__Firmicutes;c__Bacilli;o__Bacillales;f__Bacillaceae;g__;s__	0	0	0.00463714	0	0.00158275	0	0	0	0	0	0	0.00794139	0	0	0	0	0	0	0	0	0	0.000874286	0	0	0	0	0	0	0	0.000836183	0.00330349	0.00764137	0	0	0.0018986	0	0	0.00739946	0.00214151	0	0	0	0	0	0	0	0	0
k__Bacteria;p__Firmicutes;c__Bacilli;o__Bacillales;f__Bacillaceae;g__Anoxybacillus;s__kestanbolensis	0	0.00406896	0	0.27404	0.0142448	0	0	0	0	0	0	0	0	0	0	0	0	0	0	0	0	0.00174857	0	0	0	0	0	0	0.01338	0	0	0	0	0	0	0	0	0	0	0.00158183	0	0	0.050179	0.00307229	0	0.0231169	0.0146314	0.118238
k__Bacteria;p__Firmicutes;c__Bacilli;o__Bacillales;f__Bacillaceae;g__Bacillus;Other	0.00167255	0	0.00618286	0.0153955	0.00158275	0	0	0	0	0	0	0.00198535	0	0	0	0	0	0	0	0	0	0	0	0	0	0	0	0.00215332	0	0.000836183	0.00991048	0	0	0	0	0	0	0.00832439	0	0.000790914	0	0	0.0100358	0	0	0.00355644	0	0.0123165
k__Bacteria;p__Firmicutes;c__Bacilli;o__Bacillales;f__Bacillaceae;g__Bacillus;s__	0.00167255	0.00135632	0	0.0431074	0.096548	0	0	0	0.00436634	0.00415878	0.00786361	0.00198535	0	0	0	0	0	0	0.000810642	0	0	0.00699429	0	0	0	0.00403218	0.00599245	0	0.00191142	0.000836183	0.0264279	0	0	0	0.00284789	0	0	0.0175737	0	0	0	0	0.00669053	0	0	0	0	0.0024633
k__Bacteria;p__Firmicutes;c__Bacilli;o__Bacillales;f__Bacillaceae;g__Bacillus;s__cereus	0	0	0	0	0	0	0	0	0	0	0	0	0	0	0	0	0	0	0	0	0	0	0	0	0	0	0	0.00215332	0	0	0	0	0	0	0.000949298	0	0	0	0	0	0	0	0	0	0	0	0	0
k__Bacteria;p__Firmicutes;c__Bacilli;o__Bacillales;f__Bacillaceae;g__Bacillus;s__clausii	0	0	0	0	0.0174103	0	0	0	0	0	0	0	0	0	0	0	0	0	0	0	0	0	0	0	0	0	0	0	0	0	0	0	0	0	0	0	0	0	0	0	0	0	0	0	0	0	0	0
k__Bacteria;p__Firmicutes;c__Bacilli;o__Bacillales;f__Bacillaceae;g__Bacillus;s__flexus	0	0.00135632	0	0	0.00633102	0	0	0.00138053	0	0	0	0	0	0	0	0	0	0	0	0	0	0	0	0	0	0	0	0	0.00191142	0.00334473	0	0	0	0.00255099	0	0	0	0	0	0	0	0	0	0	0	0	0	0
k__Bacteria;p__Firmicutes;c__Bacilli;o__Bacillales;f__Bacillaceae;g__Bacillus;s__ginsengihumi	0	0	0	0	0.00949653	0	0	0	0	0	0	0	0	0	0	0	0	0	0	0	0	0	0	0	0	0	0	0	0	0	0	0	0	0	0	0	0	0	0	0	0	0	0	0	0	0	0	0
k__Bacteria;p__Firmicutes;c__Bacilli;o__Bacillales;f__Bacillaceae;g__Bacillus;s__muralis	0	0	0	0	0	0	0	0	0	0	0	0	0	0	0	0	0	0	0	0	0	0	0	0	0	0	0	0	0	0	0.00660698	0	0	0	0	0	0.00213885	0	0	0.000790914	0	0	0	0	0	0	0	0
k__Bacteria;p__Firmicutes;c__Bacilli;o__Bacillales;f__Bacillaceae;g__Bacillus;s__thermoamylovorans	0	0	0	0.0153955	0	0	0	0	0	0	0	0	0	0	0	0	0	0	0	0	0	0	0	0	0	0	0	0	0	0	0.019821	0	0	0	0	0	0	0	0	0	0	0	0	0	0.00366596	0	0	0
k__Bacteria;p__Firmicutes;c__Bacilli;o__Bacillales;f__Bacillaceae;g__Bacillus;s__thuringiensis	0	0	0	0	0	0	0	0	0	0	0	0	0	0	0	0	0	0	0	0	0	0	0	0	0	0	0	0	0.00191142	0	0.00330349	0	0	0	0	0	0	0	0	0	0	0	0	0	0	0	0	0
k__Bacteria;p__Firmicutes;c__Bacilli;o__Bacillales;f__Bacillaceae;g__Geobacillus;s__	0	0.00271264	0	0.044647	0	0.00183412	0	0	0	0	0	0	0	0	0	0	0	0	0	0	0	0	0	0	0	0	0.00399497	0	0	0	0.00991048	0	0	0	0	0	0	0	0	0	0	0	0.0100358	0	0	0	0	0
k__Bacteria;p__Firmicutes;c__Bacilli;o__Bacillales;f__Listeriaceae;Other;Other	0	0	0	0	0	0	0	0	0	0	0	0	0	0	0	0	0	0	0	0	0	0	0	0	0	0	0	0	0	0	0	0	0	0	0	0	0	0	0	0	0	0	0.0133811	0	0	0	0	0
k__Bacteria;p__Firmicutes;c__Bacilli;o__Bacillales;f__Listeriaceae;g__Brochothrix;Other	0	0	0	0.0215537	0	0	0	0	0	0	0	0	0	0	0	0	0	0	0	0	0	0.0445886	0	0	0	0	0	0	0	0	0	0	0	0	0	0	0	0	0	0	0	0	0	0	0	0	0	0
k__Bacteria;p__Firmicutes;c__Bacilli;o__Bacillales;f__Paenibacillaceae;g__;s__	0	0	0	0.0061582	0	0	0	0	0	0	0.00314545	0	0	0	0	0	0	0	0.000810642	0	0	0.00174857	0	0	0	0.00201609	0	0	0	0	0	0	0	0	0	0	0.00213885	0	0	0	0	0	0	0	0	0.0248951	0.0292629	0.00985319
k__Bacteria;p__Firmicutes;c__Bacilli;o__Bacillales;f__Paenibacillaceae;g__Brevibacillus;Other	0	0.00271264	0	0	0	0	0	0	0	0	0	0	0	0	0	0	0	0	0	0	0	0	0	0	0	0	0	0	0	0	0	0	0	0	0	0	0	0	0	0	0	0	0	0	0	0	0	0
k__Bacteria;p__Firmicutes;c__Bacilli;o__Bacillales;f__Paenibacillaceae;g__Brevibacillus;s__	0	0	0	0	0	0	0	0	0	0	0	0.0039707	0	0	0	0.000749299	0	0	0	0	0	0	0	0	0	0	0.00199748	0	0	0	0	0	0	0	0	0	0	0	0	0	0	0	0	0	0	0.00355644	0	0
k__Bacteria;p__Firmicutes;c__Bacilli;o__Bacillales;f__Paenibacillaceae;g__Cohnella;s__	0	0	0	0	0.00316551	0	0.00290998	0	0	0	0	0	0	0	0	0	0	0	0	0	0	0	0	0	0	0	0	0	0	0	0	0.00764137	0	0	0	0	0	0	0	0	0	0	0	0	0	0	0	0
k__Bacteria;p__Firmicutes;c__Bacilli;o__Bacillales;f__Paenibacillaceae;g__Paenibacillus;s__	0	0	0	0.00461865	0.0332378	0	0.00581996	0	0.00218317	0.00207939	0	0.00198535	0.000843939	0.00193592	0	0	0	0	0.00567449	0	0.00488249	0	0	0	0.00180701	0.0120965	0.00998742	0.00861326	0.00191142	0	0	0	0.00438635	0.00127549	0	0	0	0	0	0.00395457	0	0	0	0	0	0.00177822	0	0
k__Bacteria;p__Firmicutes;c__Bacilli;o__Bacillales;f__Paenibacillaceae;g__Paenibacillus;s__barengoltzii	0	0	0	0	0	0	0	0	0	0.00207939	0	0.00198535	0	0	0	0	0	0	0	0.00347711	0	0	0	0	0	0.00201609	0.00199748	0	0	0	0	0	0	0	0	0	0	0	0	0	0	0	0	0	0	0.00355644	0	0
k__Bacteria;p__Firmicutes;c__Bacilli;o__Bacillales;f__Planococcaceae;g__;s__	0	0.00542527	0.142206	0.0030791	0.00316551	0	0.00145499	0.00276106	0	0.00623817	0	0.0119121	0	0	0.0023561	0.000749299	0.000710959	0.0121714	0	0.00521567	0.0016275	0	0.0377477	0	0.00722804	0.00201609	0.00199748	0.0516796	0.0229371	0.00919802	0.0396419	0.00509424	0	0	0.0303775	0.0112507	0	0.00184986	0.0428302	0.00395457	0.00974108	0.00635617	0.0301074	0.0245783	0	0.0284515	0.0146314	0.00492659
k__Bacteria;p__Firmicutes;c__Bacilli;o__Bacillales;f__Planococcaceae;g__Planomicrobium;s__	0	0	0	0	0	0	0	0	0	0	0	0.00198535	0	0	0	0	0	0	0	0	0	0	0	0	0	0	0	0	0	0	0	0	0	0	0	0	0	0	0	0	0	0	0	0.0122892	0	0	0	0
k__Bacteria;p__Firmicutes;c__Bacilli;o__Bacillales;f__Planococcaceae;g__Sporosarcina;s__	0.123769	0.183103	0.11902	0.0985313	0.00791377	0.00183412	0	0.070407	0.0742277	0.665405	0.320835	0.234271	0	0.00580776	0	0	0	0.00202856	0	0	0.00976499	0	0	0	0.0144561	0	0.0119849	0	0.063077	0.127936	0.013214	0.0483953	0	0.132651	0.035124	0.180011	0	0	0	0	0.00194822	0	0	0	0	0	0	0
k__Bacteria;p__Firmicutes;c__Bacilli;o__Bacillales;f__Planococcaceae;g__Ureibacillus;s__	0	0.00135632	0	0	0	0	0	0	0	0	0	0	0	0	0	0.000749299	0	0	0	0	0	0	0	0	0	0	0	0	0.00191142	0	0	0	0	0	0	0	0	0	0	0.00237274	0	0	0	0	0	0	0	0
k__Bacteria;p__Firmicutes;c__Bacilli;o__Bacillales;f__Staphylococcaceae;Other;Other	0	0.00135632	0	0	0	0	0	0	0	0	0	0	0	0	0	0	0	0	0	0	0	0	0	0	0	0	0	0	0.00382285	0	0	0	0	0	0.000949298	0	0	0	0	0	0	0	0	0	0	0	0	0
k__Bacteria;p__Firmicutes;c__Bacilli;o__Bacillales;f__Staphylococcaceae;g__Jeotgalicoccus;s__	0	0	0	0.0030791	0	0	0	0	0.00218317	0	0	0.00992674	0	0	0	0	0	0	0	0.00521567	0	0	0	0	0.0144561	0	0.00199748	0	0.0114685	0.00585328	0	0	0	0	0	0	0	0	0	0	0	0	0	0	0	0.00177822	0	0
k__Bacteria;p__Firmicutes;c__Bacilli;o__Bacillales;f__Staphylococcaceae;g__Jeotgalicoccus;s__psychrophilus	0	0	0	0.00153955	0	0	0	0	0	0	0	0	0	0	0	0	0	0	0	0	0	0	0	0	0.00722804	0	0	0	0.00382285	0.00334473	0	0	0	0	0	0	0	0	0	0	0	0	0	0	0	0	0	0
k__Bacteria;p__Firmicutes;c__Bacilli;o__Bacillales;f__Staphylococcaceae;g__Staphylococcus;Other	0.0033451	0.0122069	0.53018	0.013856	0.0189931	0	0.00145499	0.00828317	0.00436634	0.00831756	0.00471817	0.0377216	0	0.00193592	0.0164927	0	0	0.0182571	0.00486385	0.0173856	0	0.000874286	0.0220195	0.00380604	0.0271052	0.00201609	0.0179773	0.282084	0.0783684	0.0292664	0.112319	0.020377	0	0.0127549	0.178468	0.0337521	0	0.0027748	0.182028	0.0482458	0.0292232	0.0190685	0.110394	0.0860241	0.00733192	0.072907	0.0292629	0
k__Bacteria;p__Firmicutes;c__Bacilli;o__Bacillales;f__Staphylococcaceae;g__Staphylococcus;s__	0.00501765	0.0230574	0.938249	0.0230933	0.0205758	0.00183412	0.00872994	0.0193274	0.0218317	0.00831756	0.0172999	0.0675018	0	0	0.0267025	0.000749299	0	0.0283999	0.0121596	0.0399868	0.00732374	0.00174857	0.0849324	0.00380604	0.0379472	0.00604827	0.0159799	0.333764	0.149091	0.0602052	0.221334	0.0178299	0.00657952	0.0216834	0.326559	0.0937559	0.00213885	0.013874	0.376906	0.0593185	0.0350679	0.0333699	0.244204	0.0675904	0.0146638	0.154705	0.0497469	0.00492659
k__Bacteria;p__Firmicutes;c__Bacilli;o__Bacillales;f__Staphylococcaceae;g__Staphylococcus;s__aureus	0	0	0.00463714	0	0.00316551	0	0	0.00138053	0	0	0	0	0	0	0.000785367	0.000749299	0	0.00202856	0	0	0	0	0	0	0.00180701	0	0	0.00215332	0.00191142	0.000836183	0.00330349	0	0	0	0.000949298	0	0	0	0.00214151	0.00158183	0	0	0	0	0	0	0.00292629	0
k__Bacteria;p__Firmicutes;c__Bacilli;o__Bacillales;f__Staphylococcaceae;g__Staphylococcus;s__epidermidis	0	0	0.00154571	0	0.00158275	0	0	0	0	0	0	0	0	0	0	0	0	0	0	0	0	0	0	0	0	0	0	0	0	0	0	0	0	0	0.000949298	0	0	0	0	0	0	0	0.0267621	0	0	0	0	0
k__Bacteria;p__Firmicutes;c__Bacilli;o__Bacillales;f__Staphylococcaceae;g__Staphylococcus;s__sciuri	0.00167255	0.0691722	0.166937	0.0554238	0.0189931	0.00366824	0.0669295	0.073168	0.155005	0.116446	0.0975088	0.123092	0	0.00967961	0.00863904	0	0	0	0	0	0	0	0	0	0.0307192	0.00201609	0.0119849	0.0387597	0.00191142	0.00919802	0.0330349	0	0	0	0.00474649	0.0750047	0.00213885	0	0.00214151	0.00237274	0	0	0	0	0	0	0	0
k__Bacteria;p__Firmicutes;c__Bacilli;o__Bacillales;f__Thermoactinomycetaceae;Other;Other	0	0	0.00463714	0	0	0	0	0	0	0	0	0	0	0	0	0	0	0	0	0.00173856	0	0	0	0	0	0	0	0	0	0	0.00330349	0	0.00219317	0	0	0	0	0	0.00642453	0	0	0	0	0	0	0	0	0
k__Bacteria;p__Firmicutes;c__Bacilli;o__Bacillales;f__Thermoactinomycetaceae;g__;s__	0	0	0.00618286	0	0	0	0	0	0	0	0	0	0	0.00387184	0	0	0	0	0	0.00521567	0	0	0	0	0	0.00604827	0	0	0	0	0.00330349	0	0	0	0	0	0	0	0	0	0	0	0	0	0	0	0	0
k__Bacteria;p__Firmicutes;c__Bacilli;o__Bacillales;f__Thermoactinomycetaceae;g__Planifilum;s__	0	0	0	0	0	0	0	0	0	0	0	0	0.000843939	0	0	0	0	0	0.000810642	0	0	0	0	0	0	0	0	0	0	0	0	0.00509424	0	0	0.000949298	0	0	0	0	0	0	0	0	0	0	0	0	0
k__Bacteria;p__Firmicutes;c__Bacilli;o__Bacillales;f__[Thermicanaceae];g__Thermicanus;s__	0	0	0	0.397204	0	0	0	0	0.00436634	0	0	0	0	0	0	0	0	0	0	0	0	0	0	0	0	0	0	0	0.00191142	0	0.00330349	0	0	0	0	0	0	0	0	0.00158183	0	0	0.0200716	0	0	0.0213386	0.0146314	0.0615824
k__Bacteria;p__Firmicutes;c__Bacilli;o__Gemellales;f__Gemellaceae;g__;s__	0.00167255	0	0	0	0	0	0	0.00828317	0.00218317	0.00207939	0	0	0	0	0	0	0	0	0	0.00521567	0	0	0	0	0	0	0	0	0	0	0	0	0	0	0	0	0	0	0	0	0	0	0	0	0	0	0	0
k__Bacteria;p__Firmicutes;c__Bacilli;o__Lactobacillales;Other;Other;Other	0	0	0	0	0	0	0	0.00138053	0.0065495	0.00623817	0.00314545	0.00595604	0.000843939	0	0.00157073	0.0052451	0.00284384	0.00608569	0.00162128	0.00521567	0.0105787	0.000874286	0	0	0	0	0	0	0.00382285	0.000836183	0.00330349	0.00254712	0	0	0	0.00375023	0.00213885	0.000924932	0.00856604	0.00316366	0	0	0	0	0	0.0124475	0	0
k__Bacteria;p__Firmicutes;c__Bacilli;o__Lactobacillales;f__;g__;s__	0	0	0	0	0	0.00183412	0	0	0	0	0	0	0	0	0	0.000749299	0.00142192	0	0	0.00173856	0	0.000874286	0	0	0	0	0	0	0	0	0	0	0	0	0	0	0	0	0	0	0	0	0	0	0	0	0	0
k__Bacteria;p__Firmicutes;c__Bacilli;o__Lactobacillales;f__Aerococcaceae;g__;s__	0	0	0	0	0	0	0	0	0	0	0	0	0	0	0	0	0	0	0	0	0	0	0	0	0.00542103	0	0	0	0	0	0	0	0	0	0	0	0	0	0	0	0	0	0	0	0	0	0	0
k__Bacteria;p__Firmicutes;c__Bacilli;o__Lactobacillales;f__Aerococcaceae;g__Facklamia;s__	0	0	0	0	0	0	0	0	0	0	0	0	0	0	0	0	0	0	0	0	0	0	0.0975149	0	0	0	0	0	0	0	0	0	0	0	0	0	0	0	0	0	0	0	0	0	0	0	0	0
k__Bacteria;p__Firmicutes;c__Bacilli;o__Lactobacillales;f__Carnobacteriaceae;g__Carnobacterium;s__	0	0	0	0	0	0.00183412	0	0	0	0	0	0	0	0	0	0	0	0	0	0	0	0.00349715	0	0	0	0	0	0	0	0	0	0	0	0	0	0	0	0	0	0	0	0	0	0	0	0	0	0
k__Bacteria;p__Firmicutes;c__Bacilli;o__Lactobacillales;f__Carnobacteriaceae;g__Granulicatella;s__	0	0	0	0	0	0	0	0	0	0	0	0.00198535	0	0	0	0	0	0	0	0	0	0	0	0	0	0	0	0	0	0.000836183	0	0	0	0	0	0	0	0	0	0.000790914	0	0	0	0	0	0.00355644	0	0
k__Bacteria;p__Firmicutes;c__Bacilli;o__Lactobacillales;f__Enterococcaceae;Other;Other	0.0117078	0.00678159	0	0	0.00158275	0.0201753	0.00145499	0.00138053	0	0	0.00786361	0.0039707	0	0	0.000785367	0.0022479	0.000710959	0.032457	0	0.00869278	0.0016275	0.00262286	0	0.0114181	0	0	0	0	0	0.00167237	0	0	0	0	0	0.0862554	0.00213885	0	0.00214151	0	0	0	0	0	0	0.00355644	0	0
k__Bacteria;p__Firmicutes;c__Bacilli;o__Lactobacillales;f__Enterococcaceae;g__;s__	0	0	0	0	0	0	0	0	0	0	0.00157272	0	0	0	0	0	0	0	0.000810642	0.00173856	0	0.000874286	0	0	0	0	0	0	0	0	0	0	0	0	0	0.0262516	0	0	0	0	0	0	0	0	0	0	0	0
k__Bacteria;p__Firmicutes;c__Bacilli;o__Lactobacillales;f__Enterococcaceae;g__Enterococcus;Other	0	0	0	0	0	0.00366824	0	0.00138053	0	0	0.00157272	0	0	0	0	0	0	0	0	0	0	0	0	0	0	0	0	0	0	0	0	0	0	0	0	0	0	0	0	0	0	0	0	0	0	0	0	0
k__Bacteria;p__Firmicutes;c__Bacilli;o__Lactobacillales;f__Enterococcaceae;g__Enterococcus;s__	0.0669019	0.0651033	0.01082	0.0246328	0.0158275	0.0660284	0.0130949	0.0303716	0.0327475	0.00623817	0.0345999	0	0.00843939	0.00193592	0	0.0209804	0.0035548	0.277913	0.000810642	0.0434639	0.00732374	0.0297257	0	0.0228363	0	0.00403218	0	0	0.00382285	0.00167237	0	0	0.00219317	0	0	0.528783	0.00213885	0	0.00642453	0.00158183	0	0.00476713	0	0.00307229	0.00916489	0.0142258	0.00292629	0
k__Bacteria;p__Firmicutes;c__Bacilli;o__Lactobacillales;f__Enterococcaceae;g__Enterococcus;s__cecorum	0	0	0	0.0415679	0	0.00366824	0	0	0	0	0	0	0	0	0	0	0	0	0	0	0	0	0	0	0	0	0	0	0	0	0.00330349	0	0	0	0	0	0	0	0	0	0	0	0	0	0	0	0.0468206	0
k__Bacteria;p__Firmicutes;c__Bacilli;o__Lactobacillales;f__Lactobacillaceae;Other;Other	0	0	0	0	0	0	0	0	0	0	0	0	0.00253182	0	0	0	0.000710959	0	0.00162128	0	0	0.000874286	0	0	0	0	0	0	0	0	0	0	0	0	0	0	0	0	0.00214151	0.00158183	0	0	0	0	0	0.00355644	0	0
k__Bacteria;p__Firmicutes;c__Bacilli;o__Lactobacillales;f__Lactobacillaceae;g__Lactobacillus;Other	0.0970078	0.00271264	0.0309143	0.0061582	0.941739	0.17791	0.0232798	2.74035	2.95164	4.07353	3.31844	1.74711	3.49391	2.19533	0.360483	1.53831	2.80829	0.545683	2.34681	0.293816	0.71203	0.113657	0.644857	0.719342	0.151789	0.068547	0.145816	0.0129199	0.286714	0.786012	0.251065	0.226694	0.0153522	1.65559	0.147141	2.26514	0.814904	0.132265	5.59363	1.15711	0.88449	1.79562	1.07718	1.3088	0.181465	3.29326	1.24367	0.108385
k__Bacteria;p__Firmicutes;c__Bacilli;o__Lactobacillales;f__Lactobacillaceae;g__Lactobacillus;s__	0.901504	0.995538	0.575006	0.535764	0.878429	1.96801	0.426312	42.4361	53.4614	36.3769	38.1747	35.3313	21.3635	16.0527	9.14638	15.8394	23.2619	14.6604	28.9999	14.1188	20.3934	14.2955	14.514	11.186	2.05999	1.49191	1.61197	1.01637	14.7543	18.1259	1.42711	15.0942	1.68217	13.3506	4.20349	35.2972	19.2925	19.9554	28.5656	17.4966	16.2929	11.9035	34.5666	21.2203	4.79507	56.3411	23.8405	10.0946
k__Bacteria;p__Firmicutes;c__Bacilli;o__Lactobacillales;f__Lactobacillaceae;g__Lactobacillus;s__iners	0.0150529	0.00406896	0.00618286	0.0369492	0.0110793	0.00366824	0.0116399	0.0110442	0.0174653	0.0270321	0.0188727	0.00198535	0.00506363	0.00967961	0.0188488	0.0029972	0.00995343	0.032457	0.00405321	0.0208627	0.0170887	0.0131143	0.330293	0.0228363	0.00903506	0.0262091	0.00998742	0.0279931	0.0210257	0.00418092	0.013214	0.0433011	0.0219317	0.193875	0.176569	0.0787549	0.0213885	0.147989	0.0149906	0.00790914	0.0253268	0.00794521	0.214097	0.0614458	0.00549894	0.0142258	0.0380417	0.113312
k__Bacteria;p__Firmicutes;c__Bacilli;o__Lactobacillales;f__Lactobacillaceae;g__Lactobacillus;s__reuteri	0.0267608	0	0.00154571	0	0.204175	0.0275118	0.00581996	0.498371	0.537059	0.777692	0.58348	0.387143	0.71566	0.422031	0.0604733	0.326695	0.647684	0.107514	0.45396	0.0417253	0.139151	0.0192343	0.0943693	0.175078	0.0126491	0.0181448	0.0439446	0.00215332	0.0401399	0.194831	0.0495524	0.0458482	0.0175454	0.290813	0.0275296	0.491281	0.124054	0.0258981	0.944406	0.212756	0.175339	0.300329	0.147192	0.251928	0.0421585	0.544135	0.163872	0.0172431
k__Bacteria;p__Firmicutes;c__Bacilli;o__Lactobacillales;f__Lactobacillaceae;g__Lactobacillus;s__ruminis	0	0	0	0	0	0	0	0	0	0	0	0	0	0	0.000785367	0	0.00142192	0.00608569	0	0	0	0	0	0	0	0	0	0	0	0	0	0	0	0	0	0	0	0.000924932	0	0.000790914	0	0	0	0	0	0	0	0
k__Bacteria;p__Firmicutes;c__Bacilli;o__Lactobacillales;f__Lactobacillaceae;g__Lactobacillus;s__vaginalis	0	0	0	0	0.00316551	0	0	0.00276106	0	0	0	0	0.00590757	0	0	0	0	0	0	0	0.000813749	0	0	0	0	0	0	0	0	0.000836183	0	0	0	0	0	0	0	0	0.00214151	0	0	0.00158904	0	0	0	0	0.00292629	0
k__Bacteria;p__Firmicutes;c__Bacilli;o__Lactobacillales;f__Lactobacillaceae;g__Pediococcus;Other	0	0	0	0	0	0	0	0.00552212	0	0	0	0	0	0	0	0	0	0	0	0	0	0	0	0	0	0	0	0	0	0	0	0	0	0	0	0	0	0	0	0	0	0	0	0	0	0	0	0
k__Bacteria;p__Firmicutes;c__Bacilli;o__Lactobacillales;f__Leuconostocaceae;g__;s__	0	0	0	0	0	0	0	0	0	0	0	0	0	0	0	0	0	0	0	0	0	0	0	0	0	0.00403218	0	0	0	0	0	0	0	0	0	0	0	0	0	0	0	0	0	0	0	0	0	0
k__Bacteria;p__Firmicutes;c__Bacilli;o__Lactobacillales;f__Leuconostocaceae;g__Leuconostoc;s__	0	0	0	0	0	0	0	0.00276106	0	0	0	0	0	0	0	0	0	0	0	0	0	0	0	0	0	0	0	0	0	0	0	0	0	0	0	0	0	0	0	0	0	0	0	0	0	0	0	0
k__Bacteria;p__Firmicutes;c__Bacilli;o__Lactobacillales;f__Streptococcaceae;Other;Other	0	0	0	0	0	0	0	0	0	0.00207939	0.00157272	0.00595604	0.00253182	0	0.000785367	0	0	0.00202856	0.0137809	0.00695422	0.000813749	0.00524572	0	0	0	0	0	0	0	0	0	0	0	0.00127549	0	0	0.0171108	0	0	0.000790914	0	0.00158904	0	0	0	0	0	0.00738989
k__Bacteria;p__Firmicutes;c__Bacilli;o__Lactobacillales;f__Streptococcaceae;g__;s__	0	0	0	0	0	0	0	0.0096637	0	0.010397	0.00314545	0.0178681	0.00843939	0.00580776	0	0.0037465	0.000710959	0.00202856	0.011349	0.00695422	0.003255	0.00349715	0	0	0	0	0.00399497	0	0.00191142	0.000836183	0.00330349	0.00254712	0	0	0	0	0.0171108	0	0.00214151	0.0134455	0	0	0	0.00307229	0	0.0124475	0	0
k__Bacteria;p__Firmicutes;c__Bacilli;o__Lactobacillales;f__Streptococcaceae;g__Lactococcus;Other	0	0	0	0	0	0	0	0.00138053	0	0.00207939	0	0	0	0	0	0.0014986	0	0	0.00162128	0.00173856	0	0	0	0	0	0	0	0	0	0	0	0	0	0	0	0	0.00213885	0	0	0	0	0	0	0	0	0	0	0
k__Bacteria;p__Firmicutes;c__Bacilli;o__Lactobacillales;f__Streptococcaceae;g__Lactococcus;s__	3.0708	10.4002	4.43311	4.40158	3.5153	0.764829	5.82869	4.29483	3.23109	3.92173	3.9381	9.04128	7.81994	5.12632	2.59721	4.59545	0.710248	22.5779	16.533	26.2591	4.15093	11.1795	2.86883	2.72132	1.00108	9.09659	6.76747	4.76744	2.26122	0.364576	30.0056	16.3398	4.53549	4.06245	3.91206	3.2477	22.0281	1.82674	5.16104	17.1526	2.00861	3.72313	14.3913	5.27512	2.45986	6.44605	4.33968	35.4813
k__Bacteria;p__Firmicutes;c__Bacilli;o__Lactobacillales;f__Streptococcaceae;g__Streptococcus;Other	0	0	0	0	0	0	0	0	0	0	0	0	0	0	0	0	0	0	0.000810642	0	0	0	0	0	0	0	0	0	0	0	0	0	0	0	0	0	0.00213885	0	0	0	0	0	0	0	0	0	0	0.0024633
k__Bacteria;p__Firmicutes;c__Bacilli;o__Lactobacillales;f__Streptococcaceae;g__Streptococcus;s__	0.0351235	0.244137	0.180849	0.181667	0.403602	0.0403507	0.266263	0.0773096	0.323109	0.176748	0.143118	0.210447	0.259089	0.110347	0.228542	0.0329692	0.0312822	1.34494	0.257784	0.937082	0.318176	0.229063	0.751809	0.277841	0.0487893	0.235882	0.319597	0.193798	0.0745456	0.0443177	0.356777	1.16149	0.175454	0.156886	0.184164	0.405025	1.1229	0.0582707	0.663868	0.774305	0.0935144	0.675343	0.582076	0.156687	0.0421585	0.881997	0.436017	5.87004
k__Bacteria;p__Firmicutes;c__Bacilli;o__Lactobacillales;f__Streptococcaceae;g__Streptococcus;s__minor	0	0	0	0	0	0	0.00145499	0	0	0	0	0	0	0	0	0	0	0.00202856	0	0	0	0	0	0	0	0.00403218	0	0	0	0	0	0	0	0	0	0	0	0	0	0.000790914	0	0	0	0	0	0	0	0
k__Bacteria;p__Firmicutes;c__Bacilli;o__Turicibacterales;f__Turicibacteraceae;g__Turicibacter;s__	0.108716	3.60916	3.19808	7.279	0.0316551	0.00733649	1.07087	0.0110442	0.013099	0.0124763	0.00786361	0.00992674	1.12581	0.116155	0.627508	0.340931	0.568057	0.651168	0.00567449	0.0504181	0.109042	0.01224	0.213904	0.00380604	0.112035	0.842725	0.844935	1.07666	2.04714	0.0969973	4.95854	0	0	0.201528	0.0018986	0.105007	0.0684433	0.0897185	2.14365	13.2265	1.04424	0.405206	0.682434	1.14904	0.230955	1.43147	0.971527	0.310375
k__Bacteria;p__Firmicutes;c__Clostridia;o__Clostridiales;Other;Other;Other	0.0150529	0.122069	0.0448257	0.0569634	0.00633102	0.0165071	0.586361	0.0869733	0.0676782	0.257845	0.86657	0.246183	0.0523242	0.0193592	1.24559	0.638403	0.234617	1.08325	0.00405321	0.00347711	1.49893	1.08936	0.135263	0.399635	0.171666	0.447572	1.05867	0.305771	0.598276	0.0610414	2.27611	0.792155	0.741293	0.165814	0.119612	0.442528	1.20631	0.338525	1.38984	0.618495	0.175339	0.0937535	0.207406	0.175121	0.0623213	0.521019	0.201914	1.81791
k__Bacteria;p__Firmicutes;c__Clostridia;o__Clostridiales;f__;g__;s__	0.434863	0.20616	1.02481	0.347939	1.06519	1.69656	0.391392	0.180849	1.14398	9.54856	0.534726	0.71274	0.488641	0.555609	1.60372	0.250266	0.0910028	0.346884	1.30594	0.410299	2.34441	3.62829	3.69928	1.17987	38.0123	2.29632	4.69009	12.3105	5.98658	0.0961611	2.05147	13.3418	12.4748	9.18866	35.3405	6.11663	2.64362	2.37523	0.723831	0.35512	13.2732	2.21036	3.69986	3.17368	26.7083	2.13031	12.0036	0.869544
k__Bacteria;p__Firmicutes;c__Clostridia;o__Clostridiales;f__Christensenellaceae;g__;s__	0	0	0	0.00153955	0	0	0	0	0	0	0	0	0.00421969	0.00193592	0.0196342	0	0	0	0	0	0.00406875	0	0	0.0114181	0	0	0	0.124892	0.0516085	0.000836183	0	0.109526	0.309238	0	0.315167	0.150009	0.00427771	0	0	0	0.00779287	0	0	0	0.00183298	0	0	0
k__Bacteria;p__Firmicutes;c__Clostridia;o__Clostridiales;f__Christensenellaceae;g__Christensenella;s__	0	0	0	0	0	0	0	0	0.00218317	0	0	0	0	0	0	0	0	0	0	0	0	0	0	0	0	0.00201609	0	0	0	0	0	0	0	0	0	0	0	0	0	0	0	0	0	0	0	0	0	0
k__Bacteria;p__Firmicutes;c__Clostridia;o__Clostridiales;f__Clostridiaceae;Other;Other	0.00836274	0.10308	0.0510086	0.0508052	0.00791377	0.0220095	0.423402	0.0897344	0.0480297	0.243289	0.767489	0.2303	0.0523242	0.00774368	0.927518	0.520763	0.209022	0.799253	0.000810642	0.00695422	1.16692	0.753635	0.110098	0.361574	0.0885435	0.308462	0.968779	0.299311	0.407133	0.059369	1.34452	0.499236	0.416703	0.0931111	0.0313268	0.262516	0.778543	0.205335	1.12429	0.427094	0.0974108	0.0492603	0.12712	0.110602	0.0604883	0.480119	0.158019	0.963149
k__Bacteria;p__Firmicutes;c__Clostridia;o__Clostridiales;f__Clostridiaceae;g__;s__	0.339527	3.24567	7.33905	5.08514	0.167772	0.0641943	10.6491	2.27925	0.75101	0.405481	0.847698	0.432806	3.7243	0.0851805	20.8601	3.49623	2.35399	15.2751	0.0235086	0.0417253	3.52516	0.844561	1.17018	1.53003	1.60463	7.43937	39.2965	5.22179	6.12803	1.04607	6.44842	0.524707	0.701816	0.200253	0.0664509	0.742546	6.32459	9.15683	7.01773	20.7243	3.44445	1.20608	0.441575	1.9847	0.797346	2.18188	0.854476	1.40408
k__Bacteria;p__Firmicutes;c__Clostridia;o__Clostridiales;f__Clostridiaceae;g__02d06;s__	0	0	0	0	0	0	0	0	0	0	0	0	0	0	0.00157073	0	0	0	0	0	0	0	0	0	0	0	0	0	0	0	0	0	0	0	0	0	0	0	0	0	0	0	0	0	0	0	0	0
k__Bacteria;p__Firmicutes;c__Clostridia;o__Clostridiales;f__Clostridiaceae;g__Candidatus Arthromitus;s__	0	0	0	0	0	0	0	0	0	0	0	0	0	0	0	0	0	0	0	0	0	0	0	0	0	0	0	0	0	0	0	0	0	0	0	0	0	0	0	0	0	0	0	0	0	0	0.00585257	0
k__Bacteria;p__Firmicutes;c__Clostridia;o__Clostridiales;f__Clostridiaceae;g__Clostridium;Other	0.0133804	0.0217011	0.01082	0.0200142	0.00474826	0.00733649	0.0451047	0.00552212	0.00436634	0.00415878	0	0.00198535	0.00759545	0	0.0479074	0.00674369	0.00497672	0.0223142	0	0	0.00813749	0	0	0.00380604	0.00361402	0.0201609	0.0818968	0.0129199	0.0152914	0.00418092	0.00660698	0	0	0	0.000949298	0.00375023	0.0192497	0.0129491	0.0235566	0.0522003	0.00389643	0	0	0.00307229	0	0.00533466	0	0.0123165
k__Bacteria;p__Firmicutes;c__Clostridia;o__Clostridiales;f__Clostridiaceae;g__Clostridium;s__	0.0033451	0.0311953	0.0185486	0.0061582	0.00316551	0.00183412	0.0989393	0.00690265	0.0065495	0.00415878	0	0.00198535	0.00759545	0	0.497923	0.0614426	0.0199069	0.200828	0	0	0.0773062	0.000874286	0.0125826	0.00761209	0.00361402	0.0524183	0.677147	0.0581395	0.0917484	0.0050171	0.125533	0	0.00219317	0.00510198	0.000949298	0	0.143303	0.0360724	0.182028	0.182701	0.00974108	0.0111233	0.00669053	0.119819	0	0.0213386	0	0.00985319
k__Bacteria;p__Firmicutes;c__Clostridia;o__Clostridiales;f__Clostridiaceae;g__Clostridium;s__perfringens	0.0133804	0.029839	0.07574	0.030791	0.00158275	0	0.0945743	0.0110442	0.0065495	0	0.00157272	0.00794139	0.0447288	0.00193592	0.134298	0.0232283	0.0113754	0.117657	0	0	0.0244125	0	0.00943693	0.00761209	0.0126491	0.04637	0.247688	0.0236865	0.0286714	0.00836183	0.0264279	0	0.00438635	0.00127549	0.000949298	0	0.087693	0.121166	0.0621038	0.279193	0.044809	0.0143014	0	0.0368675	0.00183298	0.00355644	0.00292629	0
k__Bacteria;p__Firmicutes;c__Clostridia;o__Clostridiales;f__Clostridiaceae;g__SMB53;s__	0	0.0217011	0.00309143	0.00769776	0.00316551	0	0.129494	0.0193274	0.00873267	0.0415878	0.168281	0.039707	0.00590757	0.00580776	0.262313	0.122136	0.0582987	0.182571	0	0	0.263655	0.243052	0.0314564	0.110375	0.0216841	0.108869	0.177776	0.0667528	0.0860141	0.0100342	0.445971	0.15028	0.14475	0.0293364	0.0123409	0.0787549	0.228857	0.0675201	0.299812	0.102819	0.0292232	0.0111233	0.0568695	0.0245783	0.00733192	0.108471	0.0292629	0.330082
k__Bacteria;p__Firmicutes;c__Clostridia;o__Clostridiales;f__Clostridiaceae;g__Sarcina;s__	0	0	0	0	0	0	0	0	0	0	0	0	0	0	0.00157073	0	0	0.00608569	0	0	0	0	0	0	0	0	0	0	0	0	0	0	0	0	0	0	0	0.000924932	0.00214151	0.0055364	0	0	0	0	0	0	0	0
k__Bacteria;p__Firmicutes;c__Clostridia;o__Clostridiales;f__Clostridiaceae;g__Thermoanaerobacterium;s__saccharolyticum	0	0	0	0.00461865	0	0	0	0	0	0	0	0	0	0	0	0	0	0	0	0	0	0	0	0	0	0	0	0	0	0	0	0	0	0	0	0	0	0	0	0	0	0	0	0	0	0	0	0
k__Bacteria;p__Firmicutes;c__Clostridia;o__Clostridiales;f__Dehalobacteriaceae;g__Dehalobacterium;s__	0.00501765	0	0	0	0	0.00366824	0	0	0	0.0457466	0	0.0039707	0.00168788	0	0.0172781	0	0	0	0.00486385	0	0.0732374	0.00612	0.289399	0.0114181	0.209613	0.00201609	0.00599245	0.103359	0.0152914	0	0	0.020377	0.0350908	0	0.0550593	0	0.0106943	0.000924932	0	0	0.451986	0.0476713	0	0	0.39409	0.0266733	0.061452	0
k__Bacteria;p__Firmicutes;c__Clostridia;o__Clostridiales;f__Eubacteriaceae;g__Anaerofustis;s__	0.00167255	0	0	0	0	0	0	0	0	0	0	0	0	0	0	0	0	0	0	0	0	0	0	0	0	0	0	0	0	0	0	0	0	0	0	0	0	0	0	0	0	0	0	0	0	0	0	0.0197064
k__Bacteria;p__Firmicutes;c__Clostridia;o__Clostridiales;f__Lachnospiraceae;Other;Other	0.0167255	0.00542527	0.00309143	0.00461865	0.00316551	0.00550237	0.0145499	0.0151858	0.0065495	0.0291115	0	0.00595604	0.000843939	0	0.0172781	0.0119888	0.00568768	0	0.011349	0.0139084	0.0016275	0.00262286	0.229632	0.114181	0.224069	0.0181448	0.0159799	0.193798	0.0382285	0.00585328	0.0297314	0.18594	0.267567	0.0624992	1.00626	0.127508	0.00855542	0.0295978	0	0	0.0740322	0.0238356	0.00334526	0.0184337	0.183298	0.0142258	0.0731572	0
k__Bacteria;p__Firmicutes;c__Clostridia;o__Clostridiales;f__Lachnospiraceae;g__;s__	0.0802823	0.00813791	0.0680114	0.0277119	0.29281	0.339313	0.0727495	0.153239	0.624386	4.48733	0.0912179	0.0555897	0.119839	0.0309747	0.558396	0.0037465	0.00853151	0.00202856	0.077011	0.0521567	0.371883	0.0804343	0.500157	0.0761209	10.468	0.741921	1.09063	5.15719	1.64383	0.018396	0.27419	1.55884	0.598737	1.30866	4.3943	0.712545	0.549686	0.386622	0.0642453	0.0197728	2.55801	0.468767	0.44492	0.88482	3.9574	0.36987	2.60732	0.115775
k__Bacteria;p__Firmicutes;c__Clostridia;o__Clostridiales;f__Lachnospiraceae;g__Blautia;Other	0	0	0	0	0	0	0	0	0	0	0	0	0	0	0	0	0	0	0	0	0	0	0	0	0	0	0	0	0	0	0	0	0	0	0	0	0	0.00462466	0	0	0	0	0	0	0	0	0	0
k__Bacteria;p__Firmicutes;c__Clostridia;o__Clostridiales;f__Lachnospiraceae;g__Blautia;s__	0.0033451	0	0	0	0	0	0	0	0.0152822	0.00207939	0.00314545	0.00198535	0	0	0	0	0	0	0	0.00347711	0	0	0	0	0.00361402	0.00604827	0.00399497	0	0.0114685	0.00418092	0	0.00509424	0.00657952	0.00892846	0.0018986	0	0.0363605	0.0221984	0	0.00474548	0.0155857	0.0349589	0	0.125964	0.00549894	0	0.0292629	0.00492659
k__Bacteria;p__Firmicutes;c__Clostridia;o__Clostridiales;f__Lachnospiraceae;g__Blautia;s__producta	0	0	0	0	0	0	0	0	0	0	0	0	0	0	0	0	0	0	0	0	0	0	0	0	0	0	0	0	0	0	0	0	0	0	0	0	0	0.00369973	0	0.000790914	0.00584465	0	0.0133811	0	0	0	0	0
k__Bacteria;p__Firmicutes;c__Clostridia;o__Clostridiales;f__Lachnospiraceae;g__Coprococcus;Other	0	0	0	0	0	0	0	0	0.00873267	0.00207939	0.00471817	0	0	0	0	0	0	0	0	0	0	0	0	0	0.00180701	0.00201609	0.00199748	0.00430663	0	0.00418092	0	0	0.00438635	0	0	0.00375023	0.00213885	0	0	0	0	0	0	0	0.00366596	0	0	0
k__Bacteria;p__Firmicutes;c__Clostridia;o__Clostridiales;f__Lachnospiraceae;g__Coprococcus;s__	0.0100353	0.00406896	0	0.00461865	0.0205758	0.0201753	0.00290998	0.0179469	0.0633119	0.151796	0.0125818	0.00992674	0.00506363	0.00193592	0.0298439	0.000749299	0.00284384	0.0182571	0.0291831	0.0226012	0.0699824	0.00699429	0.0534759	0	0.905313	0.022177	0.0199748	0.189492	0.0688113	0	0	0.537443	0.256601	0.235966	1.30434	0.187512	0.0406382	0.0591957	0.00856604	0.00790914	0.140272	0.0524384	0	0.0583735	0.207127	0.0124475	0.169725	0.0024633
k__Bacteria;p__Firmicutes;c__Clostridia;o__Clostridiales;f__Lachnospiraceae;g__Coprococcus;s__eutactus	0	0	0	0	0	0	0	0	0	0	0	0	0	0	0	0	0	0	0	0	0	0	0	0	0	0	0	0	0	0	0	0	0	0	0	0	0.00213885	0	0	0	0.0116893	0.00317808	0	0	0	0	0	0
k__Bacteria;p__Firmicutes;c__Clostridia;o__Clostridiales;f__Lachnospiraceae;g__Dorea;Other	0	0	0	0	0	0	0	0	0	0	0	0	0	0	0	0	0	0	0.00891706	0.00173856	0	0	0	0	0	0	0	0	0	0	0	0	0	0	0	0	0	0	0	0	0	0	0	0	0	0	0	0
k__Bacteria;p__Firmicutes;c__Clostridia;o__Clostridiales;f__Lachnospiraceae;g__Dorea;s__	0.0150529	0.00813791	0.00309143	0.0169351	0	0	0.0145499	0.00414159	0.0109158	0.0207939	0.0172999	0.0416923	0.013503	0	0.000785367	0.0052451	0.000710959	0	2.42544	0.495488	0.0276675	0.0131143	0.125826	0.0228363	0.171666	0.0322574	0.0199748	0.0258398	0.00573427	0.00167237	0.00660698	0.104432	0.0285113	0	0.278144	0.202513	0.014972	0.0906434	0.00642453	0.00316366	0.0116893	0.00317808	0.314455	0	0.0696532	0.0266733	0.040968	0.00738989
k__Bacteria;p__Firmicutes;c__Clostridia;o__Clostridiales;f__Lachnospiraceae;g__Dorea;s__formicigenerans	0	0	0	0	0	0	0	0	0	0	0	0	0	0	0	0	0	0	0.00486385	0.00521567	0	0	0	0	0	0	0	0	0	0	0	0	0	0	0	0	0	0	0	0	0	0	0	0	0	0	0	0
k__Bacteria;p__Firmicutes;c__Clostridia;o__Clostridiales;f__Lachnospiraceae;g__Lachnobacterium;s__	0	0	0	0	0	0	0	0	0	0	0	0.00198535	0	0	0	0	0	0	0	0	0	0	0	0	0.00180701	0	0.00199748	0	0	0	0	0	0	0	0	0	0	0	0	0	0	0	0	0	0	0	0	0
k__Bacteria;p__Firmicutes;c__Clostridia;o__Clostridiales;f__Lachnospiraceae;g__Lachnospira;s__	0	0	0	0	0	0	0	0.023469	0	0	0	0	0	0	0	0	0	0	0	0	0	0	0	0	0	0	0	0	0	0	0	0	0	0	0	0	0	0	0	0	0	0	0	0	0	0	0	0
k__Bacteria;p__Firmicutes;c__Clostridia;o__Clostridiales;f__Lachnospiraceae;g__Oribacterium;s__	0	0	0	0	0.012662	0	0	0	0	0	0	0	0	0	0	0	0	0	0	0	0	0	0	0	0	0	0	0	0	0	0	0	0	0	0	0	0	0	0	0	0	0	0	0	0	0	0	0
k__Bacteria;p__Firmicutes;c__Clostridia;o__Clostridiales;f__Lachnospiraceae;g__Roseburia;Other	0	0	0	0	0	0	0	0.0096637	0	0.00415878	0	0	0	0	0	0	0	0	0	0.00173856	0	0	0	0	0	0	0	0.00215332	0.00191142	0	0	0	0	0	0.000949298	0.00375023	0	0.000924932	0	0.00158183	0.00194822	0	0	0	0	0	0	0
k__Bacteria;p__Firmicutes;c__Clostridia;o__Clostridiales;f__Lachnospiraceae;g__Roseburia;s__	0	0	0.00154571	0	0	0	0	0.00828317	0.00218317	0.037429	0.00314545	0	0	0	0	0	0	0	0	0	0	0	0	0	0	0	0.00199748	0.0107666	0.0554313	0.000836183	0.00330349	0	0	0	0	0	0.00427771	0.000924932	0	0	0	0	0.00334526	0	0	0	0	0
k__Bacteria;p__Firmicutes;c__Clostridia;o__Clostridiales;f__Lachnospiraceae;g__Roseburia;s__faecis	0	0	0	0	0	0	0	0.00828317	0	0.00207939	0	0	0	0	0	0	0	0	0	0	0	0	0	0	0	0	0	0	0	0	0	0	0	0	0	0	0	0	0	0	0	0	0	0	0	0	0	0
k__Bacteria;p__Firmicutes;c__Clostridia;o__Clostridiales;f__Lachnospiraceae;g__[Ruminococcus];Other	0	0	0	0	0	0	0	0	0	0	0	0	0	0	0	0	0	0	0	0	0	0	0	0	0	0	0	0	0	0	0	0	0.0109659	0	0	0	0	0	0	0	0	0	0	0	0	0	0	0
k__Bacteria;p__Firmicutes;c__Clostridia;o__Clostridiales;f__Lachnospiraceae;g__[Ruminococcus];s__	0	0.00542527	0	0	0.00158275	0.00183412	0	0	0.0065495	0.00415878	0	0	0	0	0	0	0	0	0	0	0	0	0	0	0	0.0100804	0.00599245	0	0.00382285	0.00167237	0	0.0738665	1.20186	0.50382	0.0949298	0.0825052	0	0.0212734	0	0	0	0	0	0	0	0	0	0
k__Bacteria;p__Firmicutes;c__Clostridia;o__Clostridiales;f__Lachnospiraceae;g__[Ruminococcus];s__gnavus	0.127114	0.029839	0.63838	0.991471	0.288061	0.106379	0.212429	0.113203	0.144089	0.875424	0.226472	1.21702	0.129967	0.174233	0.0863904	0.221793	0.0106644	0.0121714	1.45267	0.403345	0.268537	1.41022	0.547342	1.45771	2.10155	0.133062	0.117852	1.05082	0.194965	0.128772	0.323742	1.75497	2.87964	1.82651	5.58472	1.69886	0.0941096	0.194236	0.160613	0.0427094	1.68716	0.692822	0.605493	0.820302	2.82462	0.4001	1.40754	0.335008
k__Bacteria;p__Firmicutes;c__Clostridia;o__Clostridiales;f__Peptococcaceae;g__;s__	0	0	0	0	0.00633102	0	0	0	0	0.0270321	0	0.00595604	0	0	0.000785367	0	0	0	0.00243193	0	0.0203437	0	0.0943693	0	0.0704734	0	0	0.0107666	0	0	0	0.00764137	0.00219317	0	0	0	0.00213885	0.000924932	0	0.00158183	0.0526018	0.00317808	0.0903221	0.0430121	0.247452	0.0195604	0	0.0147798
k__Bacteria;p__Firmicutes;c__Clostridia;o__Clostridiales;f__Peptococcaceae;g__rc4-4;s__	0.0100353	0	0	0	0	0	0	0	0	0	0	0	0	0	0	0	0	0	0	0.00173856	0	0	0	0	0	0	0	0	0	0	0	0	0	0	0	0	0	0.0175737	0	0	0.00974108	0.00158904	0	0.0184337	0.00549894	0	0	0
k__Bacteria;p__Firmicutes;c__Clostridia;o__Clostridiales;f__Peptostreptococcaceae;Other;Other	0	0	0	0	0	0	0	0.00276106	0	0	0	0	0	0	0	0.000749299	0	0	0	0	0	0	0	0	0	0	0	0	0.00191142	0	0	0	0	0	0	0	0	0	0	0.000790914	0	0	0	0	0	0	0	0
k__Bacteria;p__Firmicutes;c__Clostridia;o__Clostridiales;f__Peptostreptococcaceae;g__;s__	0.105371	1.79305	0.544092	0.508052	0.180434	0.236602	9.94486	1.10995	0.956227	3.58279	16.1534	3.6451	0.566283	0.243926	23.0411	10.7809	3.96715	21.2228	0.0356683	0.104313	29.1534	18.207	2.56999	7.38753	1.86845	6.86881	15.6123	5.59862	10.7002	0.982515	33.7154	14.0372	12.4682	2.90302	1.0784	7.46297	16.7665	5.51815	24.3297	8.22946	2.60087	0.983617	3.61958	2.45476	0.934819	9.52415	3.62274	27.1603
k__Bacteria;p__Firmicutes;c__Clostridia;o__Clostridiales;f__Ruminococcaceae;Other;Other	0	0	0	0	0.00158275	0	0.00145499	0	0.00218317	0.0311909	0	0	0.000843939	0	0.00314147	0	0	0	0	0	0.00488249	0	0.0754954	0	0.140947	0.00806435	0.00599245	0.0193798	0.00191142	0	0	0.0916964	0.0921133	0.00765296	0.0683495	0.0112507	0.0128331	0	0	0.000790914	0.0175339	0	0	0	0.0238287	0.00177822	0	0.00492659
k__Bacteria;p__Firmicutes;c__Clostridia;o__Clostridiales;f__Ruminococcaceae;g__;s__	0.112061	0.033908	0.0494629	0.0169351	0.457416	0.121052	0.0974843	0.0262301	0.235782	0.954441	0.0487544	0.0615458	0.0784863	0.0755009	0.59845	0.0179832	0.0106644	0.00608569	1.56697	0.128653	0.554163	0.0507086	0.984586	0.0304484	5.1807	0.399186	0.305615	4.76098	0.825735	0.018396	0.138747	2.48854	2.0572	1.99487	8.2456	1.08382	0.536852	0.434718	0.0385472	0.0229365	1.8021	0.28126	0.421503	0.577591	7.7645	0.512127	1.85819	0.204454
k__Bacteria;p__Firmicutes;c__Clostridia;o__Clostridiales;f__Ruminococcaceae;g__Anaerotruncus;s__	0	0	0.01082	0	0	0	0.00145499	0	0	0.00415878	0	0	0.000843939	0	0.00157073	0	0	0	0	0	0	0	0	0	0	0.0100804	0.00399497	0.00430663	0	0	0	0.0331126	0.0328976	0	0.110119	0	0	0	0	0	0.0253268	0	0	0	0.00549894	0	0	0
k__Bacteria;p__Firmicutes;c__Clostridia;o__Clostridiales;f__Ruminococcaceae;g__Ethanoligenens;s__	0	0	0	0	0	0.00917061	0	0	0	0	0	0	0	0	0	0	0	0	0	0	0	0	0	0	0	0	0	0	0	0	0	0	0	0	0	0	0	0	0	0	0	0	0	0	0	0	0	0
k__Bacteria;p__Firmicutes;c__Clostridia;o__Clostridiales;f__Ruminococcaceae;g__Faecalibacterium;s__prausnitzii	0	0	0	0	0	0	0	0.00414159	0.0458465	0.0145557	0.00314545	0.0039707	0	0	0	0	0	0	0	0	0	0.000874286	0	0	0.00361402	0.0100804	0.0139824	0.00215332	0.01338	0.00752565	0	0.0101885	0.00219317	0.00382648	0.0018986	0	0	0	0	0	0	0	0	0	0	0.00355644	0	0
k__Bacteria;p__Firmicutes;c__Clostridia;o__Clostridiales;f__Ruminococcaceae;g__Oscillospira;s__	0.0317784	0.00135632	0.142206	0.0030791	0.196262	0.185246	0.0378297	0.0248495	0.248881	0.85463	0.0408908	0.0178681	0.0523242	0.0135514	0.296083	0.0044958	0.00853151	0.00202856	0.0753897	0.0538952	0.272606	0.0402172	0.861906	0.110375	5.24937	1.22377	0.810978	3.75969	0.586807	0.00585328	0.122229	2.15232	1.07027	1.07779	3.1773	0.731296	0.357189	0.107292	0.0256981	0.0245183	1.71833	0.289206	0.414813	0.264217	5.22949	0.327193	1.9372	0.0738989
k__Bacteria;p__Firmicutes;c__Clostridia;o__Clostridiales;f__Ruminococcaceae;g__Ruminococcus;s__	0.0234157	0	0	0.00923731	0.0538136	0.0623601	0.00872994	0.00138053	0.0414802	0.193383	0	0.0119121	0.00675151	0.00774368	0.0227756	0.0014986	0.00568768	0.00608569	0.0194554	0.0278169	0.0618449	0.0113657	0.0157282	0.00380604	0.896278	0.0403218	0.0679144	0.249785	0.0477856	0.00752565	0.0231244	0.924605	0.449601	0.363516	1.67171	0.131258	0.183941	0.153539	0.0192736	0.0118637	0.387695	0.0667398	0.0735958	0.199699	0.70753	0.0657942	0.53551	0
k__Bacteria;p__Firmicutes;c__Clostridia;o__Clostridiales;f__Ruminococcaceae;g__Ruminococcus;s__bromii	0	0	0	0	0	0.00366824	0	0	0	0	0	0	0	0	0	0	0	0	0	0	0	0	0	0	0	0	0.00199748	0	0	0	0	0	0	0	0	0	0.0171108	0.000924932	0	0	0.00194822	0.00158904	0	0	0.00366596	0	0.0117051	0
k__Bacteria;p__Firmicutes;c__Clostridia;o__Clostridiales;f__Ruminococcaceae;g__Ruminococcus;s__flavefaciens	0	0.00949423	0	0.00153955	0	0	0	0	0	0	0	0	0	0	0	0	0	0	0	0	0	0	0	0	0	0	0	0	0	0	0	0	0	0	0	0	0.00213885	0	0	0	0	0.0127123	0	0	0	0	0	0
k__Bacteria;p__Firmicutes;c__Clostridia;o__Clostridiales;f__Veillonellaceae;g__;s__	0	0	0	0	0	0	0	0	0.00218317	0	0	0	0	0	0	0	0	0.00405712	0	0	0	0	0	0	0	0.0100804	0	0	0	0	0	0	0	0	0	0	0	0	0	0	0	0	0	0	0	0	0	0.00985319
k__Bacteria;p__Firmicutes;c__Clostridia;o__Clostridiales;f__Veillonellaceae;g__Acidaminococcus;s__	0	0	0	0	0	0	0	0	0	0	0	0	0	0	0	0	0	0	0	0	0	0	0	0	0	0	0	0	0	0	0	0	0	0.00510198	0.0018986	0.00375023	0	0	0	0	0	0	0	0	0	0	0	0
k__Bacteria;p__Firmicutes;c__Clostridia;o__Clostridiales;f__Veillonellaceae;g__Megasphaera;s__	0	0	0	0	0	0	0	0.00828317	0	0	0	0	0	0	0	0	0	0	0	0	0	0	0	0	0	0	0	0	0	0	0	0	0	0	0	0	0	0	0	0	0	0	0	0	0	0	0	0
k__Bacteria;p__Firmicutes;c__Clostridia;o__Clostridiales;f__Veillonellaceae;g__Phascolarctobacterium;s__	0	0	0	0	0	0	0	0	0.00873267	0	0	0.00794139	0	0	0	0	0	0	0	0	0	0	0	0	0	0	0	0	0	0	0.00330349	0	0	0	0	0	0	0	0	0	0	0	0	0	0	0	0	0
k__Bacteria;p__Firmicutes;c__Clostridia;o__Clostridiales;f__Veillonellaceae;g__Sporomusa;s__	0	0	0	0	0	0	0	0	0	0	0	0	0	0	0	0	0	0	0	0.00869278	0	0	0	0	0	0	0	0	0	0	0	0	0	0	0	0	0	0	0	0	0	0	0	0	0	0	0	0
k__Bacteria;p__Firmicutes;c__Clostridia;o__Clostridiales;f__Veillonellaceae;g__Veillonella;s__	0	0.00406896	0	0	0	0	0	0	0.0065495	0.00207939	0.00157272	0.00198535	0	0	0	0	0	0	0	0	0	0	0	0	0.00180701	0.00403218	0.00599245	0.00215332	0	0	0.019821	0	0	0	0	0	0	0	0	0	0	0	0	0	0	0	0	0
k__Bacteria;p__Firmicutes;c__Clostridia;o__Clostridiales;f__Veillonellaceae;g__Veillonella;s__dispar	0	0	0	0	0	0	0	0	0.00436634	0	0.00786361	0	0.000843939	0	0	0	0	0	0	0	0	0.00174857	0	0	0.00180701	0.00201609	0.00199748	0	0	0	0	0	0	0	0.000949298	0	0.00213885	0	0	0	0	0	0	0	0	0	0	0
k__Bacteria;p__Firmicutes;c__Clostridia;o__Clostridiales;f__Veillonellaceae;g__Veillonella;s__parvula	0	0	0	0	0	0	0	0	0	0	0	0	0.00421969	0	0	0	0	0	0	0	0	0	0	0	0	0	0	0	0	0	0	0	0	0	0	0	0	0	0	0	0	0	0	0	0	0	0	0
k__Bacteria;p__Firmicutes;c__Clostridia;o__Clostridiales;f__[Mogibacteriaceae];g__;s__	0.0217431	0	0.0154571	0.0277119	0.00633102	0	0.0218248	0	0.0152822	0.037429	0.028309	0.0218388	0	0.0174233	0.00157073	0.000749299	0	0	0.0818749	0.104313	0.0016275	0.01836	0.0660585	0.0608967	0.0614384	0.0302413	0.0139824	0.0387597	0.00382285	0.00334473	0.0462489	0.0127356	0.0394771	0	0.0522114	0.0712545	0.00427771	0	0	0.00474548	0.0311715	0.00635617	0	0	0.13564	0.0106693	0.061452	0
k__Bacteria;p__Firmicutes;c__Clostridia;o__Clostridiales;f__[Mogibacteriaceae];g__Mogibacterium;s__	0	0	0	0	0	0	0.00290998	0.00138053	0	0	0	0	0	0	0	0	0	0	0	0	0	0	0	0	0	0	0	0	0	0	0	0.0127356	0	0	0	0	0	0	0	0	0	0	0	0	0	0.00177822	0	0
k__Bacteria;p__Firmicutes;c__Clostridia;o__Clostridiales;f__[Tissierellaceae];g__Finegoldia;s__	0	0	0	0	0	0	0	0	0	0.00207939	0	0	0	0	0	0	0	0	0	0	0	0	0	0	0	0	0	0	0	0	0	0	0	0	0	0	0	0	0.00428302	0	0	0	0	0	0	0	0	0
k__Bacteria;p__Firmicutes;c__Clostridia;o__Clostridiales;f__[Tissierellaceae];g__Peptoniphilus;s__	0	0	0	0	0	0	0	0	0	0	0	0	0	0	0	0	0	0	0	0	0	0	0	0	0	0	0	0	0	0	0	0	0	0	0	0	0	0	0	0	0	0	0.0267621	0	0	0	0	0
k__Bacteria;p__Firmicutes;c__Clostridia;o__Clostridiales;f__[Tissierellaceae];g__WAL_1855D;s__	0	0	0	0	0	0	0	0	0	0	0	0	0	0	0	0	0	0	0	0	0	0	0	0	0	0	0	0	0	0	0	0	0	0	0	0	0	0	0	0	0	0.00317808	0	0	0	0	0	0
k__Bacteria;p__Firmicutes;c__Clostridia;o__Clostridiales;f__[Tissierellaceae];g__ph2;s__	0	0	0	0	0	0	0	0	0	0	0	0	0	0	0	0	0	0	0	0	0	0	0	0	0	0	0	0	0	0	0	0	0	0	0	0	0	0.00647453	0	0	0	0	0	0	0	0	0	0
k__Bacteria;p__Firmicutes;c__Erysipelotrichi;o__Erysipelotrichales;f__Erysipelotrichaceae;g__;s__	0.0100353	0.00135632	0	0.0030791	0.00158275	0.00183412	0.00290998	0	0.00436634	0.00415878	0.00157272	0.00198535	0.00253182	0.00387184	0	0.000749299	0	0.0101428	0.0218873	0.0139084	0.000813749	0.00349715	0.0283108	0.0342544	0.0162631	0.00201609	0	0	0	0	0.013214	0.0101885	0.0570225	0.0204079	0	0.048753	0.00427771	0	0	0.00158183	0.0116893	0.0603836	0.0133811	0.00307229	0.00916489	0.00533466	0	0
k__Bacteria;p__Firmicutes;c__Erysipelotrichi;o__Erysipelotrichales;f__Erysipelotrichaceae;g__Allobaculum;s__	41.3906	47.9838	44.1425	48.0848	55.944	38.5496	54.7222	15.8927	16.1118	14.6119	15.8326	21.4954	34.5745	26.9674	4.03679	17.5711	21.7262	2.26996	0.0753897	0.182548	8.11877	12.7086	5.30355	19.9703	4.80846	28.3402	13.495	18.1611	17.0289	37.4878	3.84857	2.42741	4.76138	7.8022	0.793613	5.13407	15.5666	17.0632	4.99186	10.0383	7.82014	30.2538	4.42913	8.78982	0.617714	2.24945	3.51447	0.482806
k__Bacteria;p__Firmicutes;c__Erysipelotrichi;o__Erysipelotrichales;f__Erysipelotrichaceae;g__Clostridium;Other	0	0	0	0	0	0	0	0	0	0	0	0	0	0	0	0	0	0	0.00162128	0	0	0	0	0	0	0	0	0	0	0	0	0	0	0	0	0	0	0	0	0	0	0	0	0	0	0	0	0
k__Bacteria;p__Firmicutes;c__Erysipelotrichi;o__Erysipelotrichales;f__Erysipelotrichaceae;g__[Eubacterium];s__biforme	0	0	0	0	0	0	0	0	0.00218317	0.00415878	0	0.00198535	0	0	0	0	0	0	0	0	0	0	0	0	0	0.00201609	0	0	0	0	0	0	0	0	0	0	0	0	0	0	0	0	0	0	0	0	0	0
k__Bacteria;p__Gemmatimonadetes;c__Gemmatimonadetes;o__Gemmatimonadales;f__;g__;s__	0	0	0	0	0	0	0	0	0	0	0	0	0.000843939	0	0	0	0.00142192	0	0	0	0	0	0	0	0	0	0	0	0	0	0	0	0	0	0	0	0	0	0	0	0	0	0	0	0	0	0	0
k__Bacteria;p__OD1;c__ABY1;o__;f__;g__;s__	0	0	0	0	0	0	0	0	0.00218317	0	0	0	0	0	0	0	0	0	0	0	0	0	0	0	0	0.00201609	0	0	0	0	0	0	0	0	0	0	0	0	0	0	0	0	0	0	0	0	0	0
k__Bacteria;p__OD1;c__ZB2;o__;f__;g__;s__	0	0	0	0	0	0	0	0	0.00218317	0.00207939	0	0	0	0	0	0	0	0	0	0	0	0	0	0	0	0	0	0	0	0	0	0	0	0	0	0	0	0	0	0	0	0	0	0	0	0	0	0
k__Bacteria;p__Planctomycetes;c__Phycisphaerae;o__WD2101;f__;g__;s__	0	0	0	0	0	0	0	0	0	0	0	0	0	0	0	0	0	0	0	0	0.00813749	0	0	0	0	0	0	0	0	0	0	0	0	0	0	0	0	0	0	0	0	0	0	0	0	0	0	0
k__Bacteria;p__Planctomycetes;c__Planctomycetia;o__Gemmatales;f__Gemmataceae;g__;s__	0	0	0	0	0	0	0	0	0	0	0	0.00595604	0	0	0	0	0	0	0	0	0	0	0	0	0	0	0	0	0	0	0	0	0	0	0	0	0	0	0	0	0	0	0	0.0153615	0	0	0	0
k__Bacteria;p__Planctomycetes;c__Planctomycetia;o__Gemmatales;f__Gemmataceae;g__Gemmata;s__	0	0	0	0	0	0	0	0	0	0	0	0	0	0	0	0	0	0	0.00162128	0	0	0	0	0	0	0	0	0	0	0	0	0	0	0	0	0	0	0	0	0	0	0	0	0	0	0	0	0
k__Bacteria;p__Planctomycetes;c__Planctomycetia;o__Gemmatales;f__Isosphaeraceae;g__;s__	0	0	0	0	0	0	0	0	0	0	0	0	0.00506363	0	0	0	0	0	0	0	0	0	0	0	0	0	0	0	0	0	0	0	0	0	0	0	0	0	0	0	0	0	0	0	0	0	0	0
k__Bacteria;p__Planctomycetes;c__Planctomycetia;o__Pirellulales;f__Pirellulaceae;g__;s__	0	0	0	0	0	0	0	0	0	0	0	0	0	0	0	0	0	0	0	0	0	0.00437143	0	0	0	0	0	0	0	0	0	0	0	0	0	0	0	0	0	0	0	0	0	0	0	0	0	0
k__Bacteria;p__Proteobacteria;c__Alphaproteobacteria;o__Caulobacterales;f__Caulobacteraceae;Other;Other	0	0	0	0	0	0	0	0	0.00218317	0	0	0	0	0	0	0	0	0	0	0	0	0	0	0.00380604	0	0	0	0	0	0	0	0	0	0	0	0	0	0	0	0	0	0	0	0	0	0	0	0
k__Bacteria;p__Proteobacteria;c__Alphaproteobacteria;o__Caulobacterales;f__Caulobacteraceae;g__;s__	0.0234157	0.0162758	0	0.0831358	0.0680584	0.014673	0.107669	0.26092	0.279445	0.110208	0.0330272	0.0039707	0.0565439	0.24199	3.87971	0.637654	1.17024	1.65328	0.042964	0.933605	1.05136	0.326983	1.38408	0.989571	0.124684	0.0826596	0.00798993	0.85056	0.215991	0.0108704	0.122229	0.127356	0.00438635	1.10968	0.596159	0.652541	0.0598879	3.81257	0.0128491	0.828087	0.39354	0.49737	0.608838	4.27663	0.214459	0.104915	3.94756	0.756232
k__Bacteria;p__Proteobacteria;c__Alphaproteobacteria;o__Caulobacterales;f__Caulobacteraceae;g__Brevundimonas;s__diminuta	0	0	0	0	0	0	0	0	0	0	0.00314545	0	0	0	0	0	0	0	0	0	0	0	0	0	0	0	0	0	0	0	0	0	0	0	0	0	0	0	0	0	0	0	0	0	0	0	0	0
k__Bacteria;p__Proteobacteria;c__Alphaproteobacteria;o__Caulobacterales;f__Caulobacteraceae;g__Phenylobacterium;s__	0	0	0	0.00461865	0	0	0	0.00690265	0	0	0	0	0	0	0.0157073	0.0014986	0.0270165	0.0141999	0	0	0	0	0	0.0114181	0	0	0	0.00215332	0	0	0	0	0	0	0	0	0	0	0	0.00158183	0	0	0	0	0	0	0.00877886	0
k__Bacteria;p__Proteobacteria;c__Alphaproteobacteria;o__RF32;f__;g__;s__	0	0	0.00927429	0.0200142	0	0	0	0	0	0	0	0.00198535	0.00337576	0	0.0109951	0.0786764	0.0035548	0	0.0470172	0.00695422	0.0349912	0.00262286	0.0188739	0.216945	0.0144561	0.00201609	0	0	0	0	0	0.00764137	0.0153522	0	0	0	0	0.0194236	0	0	0.235734	0.460822	0	0	0.0513234	0	0	0
k__Bacteria;p__Proteobacteria;c__Alphaproteobacteria;o__Rhizobiales;Other;Other;Other	0	0	0	0	0	0	0	0	0	0	0	0	0	0	0	0	0	0	0	0	0	0	0	0	0.00903506	0.00604827	0	0	0	0	0	0	0	0	0	0	0	0	0	0	0	0	0	0	0	0	0	0
k__Bacteria;p__Proteobacteria;c__Alphaproteobacteria;o__Rhizobiales;f__;g__;s__	0.00669019	0.00678159	0	0.0061582	0.00633102	0	0	0.00414159	0.00218317	0.00207939	0.00786361	0	0	0.0116155	0.102883	0.00974089	0.0184849	0.0730282	0	0.0347711	0.0366187	0.00612	0.279962	0.0380604	0.0144561	0.022177	0.00798993	0.0107666	0.01338	0.00250855	0.00991048	0	0.0087727	0	0.0284789	0.142509	0	0.110992	0.0107076	0.00632731	0.0311715	0.0492603	0.117084	0.218133	0.0128309	0.0106693	0.131683	0.0689723
k__Bacteria;p__Proteobacteria;c__Alphaproteobacteria;o__Rhizobiales;f__Aurantimonadaceae;Other;Other	0	0	0	0	0	0	0	0	0	0	0.0110091	0	0	0	0	0	0	0	0	0	0	0	0	0	0	0	0	0	0	0	0	0	0	0	0	0	0	0	0	0	0	0	0	0	0	0	0.0234103	0
k__Bacteria;p__Proteobacteria;c__Alphaproteobacteria;o__Rhizobiales;f__Beijerinckiaceae;g__Chelatococcus;Other	0	0	0	0	0	0	0	0	0	0	0	0	0	0	0	0	0	0	0	0	0	0	0	0	0	0	0	0	0	0	0	0	0	0	0	0	0	0	0	0	0	0	0	0	0	0.00355644	0	0
k__Bacteria;p__Proteobacteria;c__Alphaproteobacteria;o__Rhizobiales;f__Bradyrhizobiaceae;Other;Other	0	0	0	0	0	0	0	0	0	0	0	0	0	0	0	0	0.000710959	0	0	0	0	0	0	0	0	0	0	0	0	0	0	0	0	0	0	0	0	0	0	0	0	0.00158904	0	0	0	0	0.00292629	0
k__Bacteria;p__Proteobacteria;c__Alphaproteobacteria;o__Rhizobiales;f__Bradyrhizobiaceae;g__;s__	0.00167255	0	0.00618286	0.0061582	0.00474826	0	0	0.00276106	0.0305643	0.00207939	0	0.0039707	0	0	0.0541903	0.0022479	0.0305713	0.0101428	0.000810642	0	0.00895124	0.00174857	0.100661	0.0228363	0.00180701	0.0120965	0	0	0.00191142	0	0	0	0	0	0	0	0.00427771	0.0554959	0.00214151	0.00316366	0.0467572	0.0508493	0	0.436265	0.00549894	0.00711288	0.160946	0.0886787
k__Bacteria;p__Proteobacteria;c__Alphaproteobacteria;o__Rhizobiales;f__Bradyrhizobiaceae;g__Balneimonas;s__	0	0	0	0	0	0	0	0	0	0	0	0	0	0	0	0	0	0.0243427	0	0	0	0	0	0	0	0	0	0	0	0	0	0	0	0	0	0	0	0	0	0	0	0	0	0	0	0	0	0
k__Bacteria;p__Proteobacteria;c__Alphaproteobacteria;o__Rhizobiales;f__Bradyrhizobiaceae;g__Bradyrhizobium;s__	0	0	0	0	0	0	0	0	0	0	0	0	0	0	0	0	0	0	0	0	0	0	0.00314564	0	0	0	0	0	0	0	0	0	0	0	0	0	0	0.00184986	0	0	0	0	0	0	0	0	0	0.0024633
k__Bacteria;p__Proteobacteria;c__Alphaproteobacteria;o__Rhizobiales;f__Brucellaceae;g__Ochrobactrum;Other	0	0	0	0	0	0	0	0	0	0	0	0	0	0	0	0	0	0	0	0	0	0	0	0	0.0307192	0	0	0	0	0	0	0	0	0	0	0	0	0	0	0	0	0	0	0	0	0	0	0
k__Bacteria;p__Proteobacteria;c__Alphaproteobacteria;o__Rhizobiales;f__Brucellaceae;g__Ochrobactrum;s__	0	0.00135632	0	0	0	0	0	0	0	0	0.00943634	0	0	0	0	0	0	0	0	0	0	0	0	0	0.0216841	0	0.00998742	0	0	0	0.00330349	0	0	0	0	0	0	0	0	0.00395457	0	0	0	0	0	0	0	0
k__Bacteria;p__Proteobacteria;c__Alphaproteobacteria;o__Rhizobiales;f__Hyphomicrobiaceae;g__;s__	0	0	0	0	0	0	0	0	0	0	0	0	0	0	0	0	0	0	0	0	0	0	0	0	0	0	0	0	0	0	0	0	0	0	0	0	0	0	0	0	0	0	0	0	0	0.00355644	0	0
k__Bacteria;p__Proteobacteria;c__Alphaproteobacteria;o__Rhizobiales;f__Hyphomicrobiaceae;g__Devosia;s__	0	0	0	0	0	0	0	0	0	0	0	0	0	0	0	0	0	0.0162285	0	0	0	0.00262286	0	0	0	0	0	0	0	0	0	0	0	0	0	0	0	0	0	0	0	0	0	0.138253	0	0	0	0
k__Bacteria;p__Proteobacteria;c__Alphaproteobacteria;o__Rhizobiales;f__Hyphomicrobiaceae;g__Hyphomicrobium;s__	0	0	0	0	0	0	0	0	0	0	0	0	0	0	0	0	0	0	0	0	0	0	0	0	0	0	0	0	0	0	0	0	0	0	0	0	0	0	0	0	0	0	0	0	0	0.00355644	0	0
k__Bacteria;p__Proteobacteria;c__Alphaproteobacteria;o__Rhizobiales;f__Hyphomicrobiaceae;g__Pedomicrobium;s__	0	0	0.00463714	0	0	0	0	0	0	0	0	0	0	0	0	0	0	0	0	0	0	0	0	0	0	0	0	0	0	0	0	0	0	0	0	0	0	0	0	0	0	0	0	0	0	0	0	0
k__Bacteria;p__Proteobacteria;c__Alphaproteobacteria;o__Rhizobiales;f__Hyphomicrobiaceae;g__Rhodoplanes;s__	0	0	0	0	0	0	0	0	0	0	0	0	0	0	0	0	0	0.0223142	0	0	0	0.00262286	0	0	0	0	0	0	0	0	0	0	0	0	0	0	0	0	0	0	0	0	0	0	0	0.0106693	0	0
k__Bacteria;p__Proteobacteria;c__Alphaproteobacteria;o__Rhizobiales;f__Methylobacteriaceae;g__;s__	0	0	0	0.00769776	0	0.00183412	0	0	0.0065495	0	0	0	0	0.00774368	0.0604733	0.0059944	0.0035548	0.0263713	0	0	0.0211575	0.00786858	0.119534	0.0304484	0	0	0	0	0	0	0	0.0229241	0.00219317	0	0	0.0525033	0	0.0693699	0	0	0	0.00476713	0	0.110602	0.00183298	0	0.0673046	0.0394128
k__Bacteria;p__Proteobacteria;c__Alphaproteobacteria;o__Rhizobiales;f__Methylobacteriaceae;g__Methylobacterium;Other	0	0	0	0.00461865	0	0	0.00145499	0	0.00218317	0	0	0	0	0	0.00785367	0	0	0	0	0	0	0	0.00629129	0.00380604	0	0.00201609	0	0.00430663	0	0	0	0	0	0.00892846	0	0.00375023	0	0.00739946	0	0.000790914	0.00194822	0.00158904	0	0.0583735	0	0.00711288	0.00585257	0
k__Bacteria;p__Proteobacteria;c__Alphaproteobacteria;o__Rhizobiales;f__Methylobacteriaceae;g__Methylobacterium;s__	0.00167255	0.00271264	0	0.00923731	0.00949653	0.00183412	0.0145499	0	0.0502129	0	0.0125818	0.00198535	0.00843939	0.0309747	0.215976	0.0119888	0.0163521	0.168371	0.00162128	0.00173856	0	0.00612	0.0817867	0	0	0	0.00199748	0.157192	0.0114685	0	0.00330349	0.00509424	0	0.160712	0	0.206263	0.00427771	0.151689	0.00214151	0.0229365	0.0467572	0.0317808	0.140501	0.261145	0.00733192	0.0266733	0.272145	0.041876
k__Bacteria;p__Proteobacteria;c__Alphaproteobacteria;o__Rhizobiales;f__Methylobacteriaceae;g__Methylobacterium;s__adhaesivum	0	0	0	0.00461865	0	0	0	0	0	0	0	0	0	0	0.00549757	0.000749299	0	0	0	0	0	0	0	0	0	0	0	0	0	0	0	0	0	0	0	0	0	0	0	0.00711823	0	0.00317808	0	0.00921687	0	0	0	0
k__Bacteria;p__Proteobacteria;c__Alphaproteobacteria;o__Rhizobiales;f__Methylobacteriaceae;g__Methylobacterium;s__hispanicum	0	0	0	0	0	0	0	0	0	0	0	0	0	0	0	0	0	0	0	0	0	0	0	0	0	0	0	0	0	0	0	0	0	0	0	0	0	0	0	0	0	0	0	0.00614458	0	0	0	0
k__Bacteria;p__Proteobacteria;c__Alphaproteobacteria;o__Rhizobiales;f__Methylocystaceae;g__Pleomorphomonas;s__	0	0	0	0	0	0	0	0	0	0	0	0	0	0	0	0	0	0	0	0	0	0.00262286	0	0	0	0	0	0	0	0	0.00660698	0	0.00657952	0	0	0	0	0	0	0	0	0	0	0	0	0	0	0
k__Bacteria;p__Proteobacteria;c__Alphaproteobacteria;o__Rhizobiales;f__Phyllobacteriaceae;g__Mesorhizobium;Other	0	0	0	0	0	0	0	0	0	0	0	0	0	0	0	0	0	0	0	0	0	0	0	0	0	0	0	0	0	0	0.013214	0	0	0	0	0	0	0	0	0	0	0	0	0	0	0	0	0
k__Bacteria;p__Proteobacteria;c__Alphaproteobacteria;o__Rhizobiales;f__Rhizobiaceae;Other;Other	0	0	0	0	0	0	0	0	0	0	0	0	0	0	0.0023561	0	0	0	0	0	0	0	0	0	0	0	0	0	0	0	0	0	0	0	0	0	0	0	0	0	0	0	0	0	0	0	0	0
k__Bacteria;p__Proteobacteria;c__Alphaproteobacteria;o__Rhizobiales;f__Rhizobiaceae;g__Agrobacterium;s__	0	0.00542527	0	0.0354097	0.00633102	0.00183412	0	0	0	0.00415878	0	0	0.000843939	0.00580776	0.122517	0.0262255	0.0142192	0.0405712	0	0.0104313	0.00569624	0.000874286	0	0.0608967	0	0.0100804	0	0.0796727	0.0286714	0	0.00660698	0.0152827	0.00219317	0.0867336	0.0977777	0.0750047	0	0.0878686	0	0.0411275	0	0	0	0.138253	0.0329936	0	0.0321892	0.0123165
k__Bacteria;p__Proteobacteria;c__Alphaproteobacteria;o__Rhizobiales;f__Xanthobacteraceae;g__;s__	0	0	0	0	0	0	0	0	0	0	0	0	0	0	0	0	0	0.0162285	0	0	0	0	0	0	0	0	0	0	0	0	0	0	0	0	0	0	0	0	0	0	0	0	0	0	0	0	0	0
k__Bacteria;p__Proteobacteria;c__Alphaproteobacteria;o__Rhodobacterales;f__Rhodobacteraceae;Other;Other	0	0	0	0	0.00316551	0	0	0	0	0	0	0	0	0	0	0	0	0	0	0	0	0	0	0	0	0	0	0	0	0	0	0	0	0	0	0	0	0	0	0	0	0	0	0	0	0	0	0
k__Bacteria;p__Proteobacteria;c__Alphaproteobacteria;o__Rhodobacterales;f__Rhodobacteraceae;g__;s__	0	0	0	0	0.012662	0	0	0	0	0.00207939	0	0	0.000843939	0	0	0	0	0	0	0	0.00895124	0	0	0	0	0	0	0	0	0	0	0	0	0.00127549	0	0	0	0	0	0	0	0	0	0	0	0.00177822	0	0
k__Bacteria;p__Proteobacteria;c__Alphaproteobacteria;o__Rhodobacterales;f__Rhodobacteraceae;g__Paracoccus;s__	0	0	0	0	0.153527	0	0	0	0	0.00207939	0	0	0	0	0	0	0	0	0	0.0104313	0.00732374	0	0	0	0	0.00201609	0	0	0	0	0.00330349	0	0	0.00127549	0	0	0	0	0.00642453	0	0	0	0	0	0	0	0	0
k__Bacteria;p__Proteobacteria;c__Alphaproteobacteria;o__Rhodobacterales;f__Rhodobacteraceae;g__Rubellimicrobium;s__	0	0	0	0.00461865	0	0	0	0	0	0	0	0	0	0	0	0	0	0.00608569	0	0	0	0	0	0	0	0	0	0	0	0	0	0	0	0	0.0113916	0	0	0	0	0	0	0	0	0	0	0	0.196061	0
k__Bacteria;p__Proteobacteria;c__Alphaproteobacteria;o__Rhodospirillales;f__;g__;s__	0	0	0	0	0	0	0	0	0	0	0	0	0	0	0	0	0	0	0	0	0	0	0	0	0	0	0	0	0	0	0.00991048	0	0	0	0	0	0	0	0	0	0	0	0	0	0	0	0	0
k__Bacteria;p__Proteobacteria;c__Alphaproteobacteria;o__Rhodospirillales;f__Acetobacteraceae;g__;s__	0	0	0	0	0	0	0	0	0	0	0	0	0	0.00580776	0.00314147	0	0	0	0	0	0	0	0	0	0	0	0	0	0	0	0	0	0	0	0	0	0	0	0	0	0	0	0	0.0184337	0.00366596	0	0	0.0714356
k__Bacteria;p__Proteobacteria;c__Alphaproteobacteria;o__Rhodospirillales;f__Rhodospirillaceae;g__;s__	0	0	0	0	0	0	0	0	0	0	0	0	0	0	0	0	0	0.00811425	0	0	0	0	0	0	0	0	0	0	0	0	0	0	0	0	0	0	0	0	0	0	0	0	0	0	0	0	0	0
k__Bacteria;p__Proteobacteria;c__Alphaproteobacteria;o__Rhodospirillales;f__Rhodospirillaceae;g__Skermanella;s__	0	0	0	0	0	0	0	0	0	0	0	0	0.00675151	0	0	0	0	0	0	0	0	0	0	0	0	0	0	0	0	0	0	0	0	0	0	0	0	0	0	0	0	0.00317808	0	0	0	0	0	0
k__Bacteria;p__Proteobacteria;c__Alphaproteobacteria;o__Rickettsiales;f__;g__;s__	0	0	0	0	0	0	0	0.00828317	0	0	0	0	0	0	0.00314147	0.000749299	0	0.0162285	0	0	0.00488249	0	0	0	0	0	0	0	0	0	0	0	0	0	0	0	0	0.0656702	0	0	0	0	0	0	0	0	0	0
k__Bacteria;p__Proteobacteria;c__Alphaproteobacteria;o__Rickettsiales;f__mitochondria;Other;Other	0	0	0	0	0	0	0	0	0	0	0	0	0	0	0	0	0	0.0162285	0.00324257	0	0	0	0	0	0	0	0	0	0	0	0.0363384	0	0	0	0	0	0	0	0	0	0	0	0.0200716	0	0	0	0.00877886	0
k__Bacteria;p__Proteobacteria;c__Alphaproteobacteria;o__Sphingomonadales;f__Erythrobacteraceae;Other;Other	0	0	0	0	0	0	0	0	0	0	0	0	0	0	0	0	0	0	0	0	0	0	0	0	0	0	0	0	0	0	0	0	0	0	0	0	0	0	0	0	0	0	0	0.0645181	0	0	0	0
k__Bacteria;p__Proteobacteria;c__Alphaproteobacteria;o__Sphingomonadales;f__Erythrobacteraceae;g__;s__	0	0	0	0	0	0	0	0	0	0	0	0	0	0	0	0	0	0	0	0	0	0.00262286	0	0	0	0	0	0	0	0	0	0	0	0	0	0	0	0	0	0	0	0	0	0.669759	0	0	0.00292629	0
k__Bacteria;p__Proteobacteria;c__Alphaproteobacteria;o__Sphingomonadales;f__Sphingomonadaceae;Other;Other	0	0	0	0	0	0	0	0	0	0	0	0	0	0	0.00628294	0.0014986	0	0.00811425	0	0.00695422	0.0016275	0.00262286	0	0	0	0	0	0	0	0	0	0	0	0	0	0	0	0.0101743	0	0.00316366	0	0	0	0	0.00366596	0	0.00292629	0
k__Bacteria;p__Proteobacteria;c__Alphaproteobacteria;o__Sphingomonadales;f__Sphingomonadaceae;g__;s__	0	0	0	0	0.00474826	0	0	0	0	0	0	0	0	0.00193592	0.0133512	0.0014986	0.00213288	0.00811425	0	0	0	0.00174857	0.00314564	0	0	0	0	0	0	0	0	0	0	0.00382648	0.0018986	0.00750047	0	0.00462466	0.00428302	0	0	0	0.00334526	0.0583735	0	0	0.0321892	0.00738989
k__Bacteria;p__Proteobacteria;c__Alphaproteobacteria;o__Sphingomonadales;f__Sphingomonadaceae;g__Kaistobacter;s__	0	0	0	0	0	0	0	0	0	0	0	0	0	0	0	0	0	0.00405712	0	0	0	0.00612	0	0	0	0	0	0	0	0	0	0	0	0	0	0	0	0	0	0	0	0.00317808	0	0.095241	0	0.00177822	0.0234103	0
k__Bacteria;p__Proteobacteria;c__Alphaproteobacteria;o__Sphingomonadales;f__Sphingomonadaceae;g__Novosphingobium;Other	0	0	0	0	0	0	0	0	0	0	0	0	0	0	0.0125659	0.0029972	0	0.00608569	0	0.0191241	0.00569624	0	0	0	0	0	0	0	0	0	0	0	0	0	0	0	0	0.0221984	0	0.00158183	0	0	0	0	0.00549894	0	0.0292629	0.0123165
k__Bacteria;p__Proteobacteria;c__Alphaproteobacteria;o__Sphingomonadales;f__Sphingomonadaceae;g__Novosphingobium;s__	0	0	0	0	0	0	0	0.0124248	0	0	0	0	0.000843939	0	0.000785367	0	0	0	0	0	0.0203437	0.0131143	0	0	0	0	0	0	0	0	0	0	0	0	0	0	0	0.000924932	0	0	0	0	0	0	0	0	0.00292629	0
k__Bacteria;p__Proteobacteria;c__Alphaproteobacteria;o__Sphingomonadales;f__Sphingomonadaceae;g__Sphingobium;s__	0	0	0	0	0	0	0.00145499	0.0110442	0.00436634	0.00831756	0	0	0	0	0.0094244	0.0029972	0.00213288	0	0	0.00347711	0.00976499	0	0	0.00380604	0	0	0	0.0150732	0.0152914	0	0	0	0	0	0.0199353	0	0	0.0129491	0	0.00395457	0	0	0	0.0983133	0.00183298	0	0	0
k__Bacteria;p__Proteobacteria;c__Alphaproteobacteria;o__Sphingomonadales;f__Sphingomonadaceae;g__Sphingomonas;Other	0	0	0	0	0	0	0	0	0	0	0	0	0	0	0.0047122	0.000749299	0	0.00405712	0	0	0	0	0	0	0	0	0	0	0	0	0	0	0	0.00127549	0	0	0	0.00184986	0	0	0	0	0	0	0	0	0.00292629	0
k__Bacteria;p__Proteobacteria;c__Alphaproteobacteria;o__Sphingomonadales;f__Sphingomonadaceae;g__Sphingomonas;s__	0.0033451	0.00406896	0	0.0153955	0.0364033	0.00550237	0.0130949	0.0786902	0.0873267	0.0249527	0.00471817	0.00595604	0.00421969	0.0909883	1.49691	0.159601	0.22964	0.511198	0.000810642	0.271215	0.194486	0.0507086	0.437244	0.197914	0.00180701	0.0241931	0	0.193798	0.063077	0.00334473	0.00660698	0.0458482	0.013159	0.47831	0.098727	0.240015	0.00427771	1.20426	0.0128491	0.261793	0.1091	0.0858083	0.113739	1.03843	0.0659872	0.0533466	1.75577	0.295596
k__Bacteria;p__Proteobacteria;c__Alphaproteobacteria;o__Sphingomonadales;f__Sphingomonadaceae;g__Sphingomonas;s__azotifigens	0	0	0.00309143	0.013856	0.0110793	0.00183412	0	0.0220885	0.0436634	0.010397	0.00786361	0.00595604	0.00590757	0.0309747	0.605518	0.0494538	0.0618535	0.26777	0	0.128653	0.0349912	0.01836	0.418371	0.0152242	0	0.00604827	0	0.155039	0.0114685	0.000836183	0.013214	0.0331126	0	0.18112	0.0702481	0.0337521	0.00427771	0.473565	0.00856604	0.0798823	0.00389643	0.0699178	0.170609	0.248856	0.0128309	0.0373426	0.986159	0.115775
k__Bacteria;p__Proteobacteria;c__Alphaproteobacteria;o__Sphingomonadales;f__Sphingomonadaceae;g__Sphingomonas;s__wittichii	0	0	0	0	0	0	0	0	0	0	0	0	0.00337576	0	0	0	0	0	0	0	0	0.000874286	0	0	0	0	0	0	0	0	0	0	0	0	0	0	0	0	0	0	0	0	0	0.00614458	0	0	0	0
k__Bacteria;p__Proteobacteria;c__Alphaproteobacteria;o__Sphingomonadales;f__Sphingomonadaceae;g__Sphingomonas;s__yabuuchiae	0	0	0	0	0	0	0	0	0	0.00207939	0	0	0	0	0.0659708	0.0052451	0.00639863	0.00202856	0	0	0.0154612	0.00174857	0	0	0	0	0	0.00430663	0	0	0	0	0	0	0	0	0	0.0249732	0	0.00158183	0	0.0111233	0	0.101386	0.00183298	0	0.00292629	0
k__Bacteria;p__Proteobacteria;c__Betaproteobacteria;Other;Other;Other;Other	0	0	0	0	0	0.00183412	0	0	0	0	0	0	0	0	0.000785367	0.0029972	0.00213288	0.00608569	0	0	0	0	0	0.00380604	0	0.00201609	0	0	0	0	0	0	0	0	0	0	0	0.000924932	0	0	0	0	0	0	0	0	0	0
k__Bacteria;p__Proteobacteria;c__Betaproteobacteria;o__;f__;g__;s__	0	0	0	0	0	0	0	0	0	0	0	0	0	0.00193592	0.00157073	0	0.000710959	0.00811425	0	0	0	0	0	0	0	0	0	0	0	0	0	0	0	0	0	0	0	0	0	0	0	0	0	0	0	0	0	0
k__Bacteria;p__Proteobacteria;c__Betaproteobacteria;o__Burkholderiales;Other;Other;Other	0	0	0	0	0	0.0183412	0	0.0124248	0.00218317	0.00415878	0	0.00198535	0.00928333	0.0367825	0.0117805	0.052451	0.0447904	0.00202856	0.00405321	0	0.000813749	0.00174857	0.00314564	0.102763	0	0.00403218	0	0.00645995	0	0	0.00330349	0	0.00438635	0	0	0	0.00213885	0.013874	0	0.00316366	0	0	0.00334526	0.0368675	0	0	0.0146314	0
k__Bacteria;p__Proteobacteria;c__Betaproteobacteria;o__Burkholderiales;f__;g__;s__	0	0	0	0	0	0	0	0	0	0	0	0	0.00337576	0	0	0	0	0	0	0	0.00895124	0.00349715	0	0	0	0	0	0	0	0	0	0	0	0	0	0	0	0	0	0	0	0	0	0.0153615	0	0	0	0
k__Bacteria;p__Proteobacteria;c__Betaproteobacteria;o__Burkholderiales;f__Alcaligenaceae;Other;Other	0	0	0	0	0	0	0	0	0	0	0	0	0	0	0.00157073	0.0029972	0.00284384	0	0	0	0	0	0	0.00380604	0	0.00201609	0	0	0	0	0	0	0	0	0	0	0	0	0	0	0	0	0	0	0	0	0	0
k__Bacteria;p__Proteobacteria;c__Betaproteobacteria;o__Burkholderiales;f__Alcaligenaceae;g__;s__	0.00167255	0	0	0.00153955	0.00158275	0	0.00436497	0.00276106	0.00218317	0.00623817	0.00314545	0	0	0.00387184	0.110737	0.0142367	0.00710959	0.032457	0.00162128	0.0208627	0.0170887	0.00437143	0.0125826	0.00761209	0	0	0	0.0172265	0.00382285	0	0.013214	0.00764137	0	0.0153059	0.00569579	0.0112507	0.00427771	0.0665951	0.00214151	0.0126546	0.00779287	0.0127123	0.0100358	0.0645181	0	0.00711288	0.0731572	0.0147798
k__Bacteria;p__Proteobacteria;c__Betaproteobacteria;o__Burkholderiales;f__Alcaligenaceae;g__Achromobacter;s__	0.0250882	0.00949423	0.0309143	0.0246328	0.00316551	0.00917061	0.0421947	0.0607433	0.104792	0.0436672	0.0157272	0.00198535	0.00843939	0.0638854	1.95949	0.223291	0.14077	0.724197	0.00972771	0.439855	0.349098	0.0874286	0.270525	0.209332	0.0487893	0.0322574	0.00399497	0.630922	0.0344056	0.000836183	0.0594629	0.0407539	0.0197386	0.346934	0.313268	0.285018	0.0171108	1.3356	0.0256981	0.261002	0.167547	0.174795	0.274312	1.53615	0.084317	0.0675724	1.63579	0.25372
k__Bacteria;p__Proteobacteria;c__Betaproteobacteria;o__Burkholderiales;f__Alcaligenaceae;g__Sutterella;s__	0.0117078	0	0.0139114	0.0107769	0.0110793	3.85716	0.0276448	1.61108	0.2205	1.0896	0.0125818	0.0258095	2.95041	8.49095	1.46785	10.918	9.97832	0.559883	0.551237	0.201672	0.297018	0.328732	0.339729	18.6915	0.103	1.88504	0.0139824	0	0.00955712	0.0142151	0	0.0687723	1.26766	0.154335	0.000949298	0.187512	1.48436	0.605831	0.167038	0.312411	0.261061	0.273315	0.0735958	0.0276506	0.0238287	0.0302297	0.0526732	0.123165
k__Bacteria;p__Proteobacteria;c__Betaproteobacteria;o__Burkholderiales;f__Burkholderiaceae;g__Burkholderia;s__	0	0	0	0	0	0	0	0	0	0	0	0	0	0	0	0	0	0	0	0	0	0.00174857	0	0	0	0	0	0	0	0	0	0	0	0	0	0	0	0	0	0	0	0	0	0	0	0	0	0
k__Bacteria;p__Proteobacteria;c__Betaproteobacteria;o__Burkholderiales;f__Burkholderiaceae;g__Lautropia;s__	0	0	0	0	0	0	0	0	0	0	0	0	0	0	0.000785367	0.0014986	0	0	0	0	0	0	0.0503303	0.00380604	0	0	0.00199748	0	0	0	0	0	0	0	0	0	0	0	0	0	0	0	0	0	0	0	0	0
k__Bacteria;p__Proteobacteria;c__Betaproteobacteria;o__Burkholderiales;f__Comamonadaceae;Other;Other	0	0.00406896	0	0.00153955	0	0	0	0	0	0.00207939	0.00471817	0	0	0	0.0251317	0.0014986	0	0.0121714	0	0.00347711	0	0.00174857	0.044039	0.00380604	0	0.00201609	0	0	0	0	0	0	0	0.0280609	0.000949298	0	0	0.00554959	0	0.00158183	0.00194822	0.00158904	0	0.178193	0.00183298	0.00177822	0.0263366	0
k__Bacteria;p__Proteobacteria;c__Betaproteobacteria;o__Burkholderiales;f__Comamonadaceae;g__;s__	0	0	0	0.00769776	0.00158275	0.232933	0.00581996	0.0814512	0.0196485	0.0623817	0.00629089	0.00198535	0.163724	0.423967	0.22383	0.639152	0.621379	0.0588283	0.0299938	0.0365097	0.0268537	0.0227314	0.00943693	0.940093	0.00722804	0.0725792	0.00199748	0.00861326	0.00382285	0	0.00330349	0.00254712	0.0482498	0.0204079	0.018986	0.0112507	0.0620268	0.0980428	0.0107076	0.0261002	0.0214304	0.0238356	0.0267621	0.141325	0.00183298	0.00355644	0.0848623	0.0197064
k__Bacteria;p__Proteobacteria;c__Betaproteobacteria;o__Burkholderiales;f__Comamonadaceae;g__Acidovorax;Other	0.00167255	0	0	0	0.00158275	0	0	0	0	0	0	0	0	0.00193592	0.0274878	0.000749299	0	0.00202856	0	0.00173856	0.003255	0	0	0	0	0	0	0.00215332	0	0	0	0	0	0	0.00759438	0	0	0.00369973	0	0	0	0.00158904	0.00669053	0	0	0	0.00877886	0.00492659
k__Bacteria;p__Proteobacteria;c__Betaproteobacteria;o__Burkholderiales;f__Comamonadaceae;g__Acidovorax;s__delafieldii	0	0	0	0	0	0	0	0	0	0	0	0	0	0.00580776	0.0102098	0	0.00142192	0	0	0	0.0016275	0	0	0	0	0	0	0	0	0	0	0	0	0	0.000949298	0	0	0.000924932	0	0	0	0	0	0	0	0	0	0
k__Bacteria;p__Proteobacteria;c__Betaproteobacteria;o__Burkholderiales;f__Comamonadaceae;g__Comamonas;s__	0	0	0	0	0	0	0	0	0	0	0	0	0	0	0	0	0	0	0	0	0	0	0	0	0	0	0	0	0	0	0	0	0	0	0	0.00750047	0	0	0	0	0	0	0	0	0	0	0	0
k__Bacteria;p__Proteobacteria;c__Betaproteobacteria;o__Burkholderiales;f__Comamonadaceae;g__Delftia;s__	0	0	0	0	0	0	0	0	0.00436634	0	0	0	0	0	0.00157073	0	0	0	0	0	0	0	0	0	0	0.00403218	0	0	0	0	0	0	0	0	0	0	0	0	0	0.00237274	0	0.00158904	0	0.00614458	0	0.00177822	0.00292629	0
k__Bacteria;p__Proteobacteria;c__Betaproteobacteria;o__Burkholderiales;f__Comamonadaceae;g__Hydrogenophaga;s__	0	0	0	0	0	0	0	0	0	0	0	0	0.00168788	0	0	0	0	0	0	0	0	0	0	0	0	0	0	0	0	0	0	0	0	0	0	0	0	0	0	0	0	0	0	0	0	0	0	0
k__Bacteria;p__Proteobacteria;c__Betaproteobacteria;o__Burkholderiales;f__Comamonadaceae;g__Methylibium;s__	0	0	0	0	0	0	0	0	0.00218317	0	0	0.00198535	0	0	0	0	0	0	0	0	0	0	0	0	0	0	0	0	0	0	0	0	0	0	0	0	0	0	0	0.000790914	0	0	0	0.301085	0	0	0	0
k__Bacteria;p__Proteobacteria;c__Betaproteobacteria;o__Burkholderiales;f__Comamonadaceae;g__Polaromonas;s__	0	0	0	0	0	0	0	0	0	0	0	0	0	0	0.000785367	0.000749299	0	0.00202856	0	0.00173856	0	0.000874286	0	0	0	0	0	0	0	0	0	0	0	0	0	0	0	0	0	0	0	0	0	0	0	0	0	0
k__Bacteria;p__Proteobacteria;c__Betaproteobacteria;o__Burkholderiales;f__Comamonadaceae;g__Rhodoferax;s__	0	0	0	0	0	0	0	0	0	0	0	0	0	0	0	0	0	0	0	0	0	0	0	0	0	0	0	0	0	0	0	0	0	0	0	0	0	0	0	0	0	0	0	0	0	0	0	0.00738989
k__Bacteria;p__Proteobacteria;c__Betaproteobacteria;o__Burkholderiales;f__Comamonadaceae;g__Roseateles;s__depolymerans	0	0	0	0.0030791	0	0	0	0	0	0	0	0	0	0	0	0	0	0	0	0	0	0	0	0	0	0	0	0	0	0	0	0	0	0	0	0	0	0	0	0	0	0	0	0.00614458	0	0	0	0
k__Bacteria;p__Proteobacteria;c__Betaproteobacteria;o__Burkholderiales;f__Comamonadaceae;g__Tepidimonas;s__	0	0	0	0.0107769	0	0	0	0	0	0	0.00471817	0	0	0	0	0	0	0	0	0	0.00406875	0	0	0	0	0	0	0	0.00191142	0	0.0858908	0	0	0	0	0	0	0	0	0.00474548	0	0.00317808	0	0	0	0.016004	0.00292629	0.00985319
k__Bacteria;p__Proteobacteria;c__Betaproteobacteria;o__Burkholderiales;f__Oxalobacteraceae;Other;Other	0	0	0	0	0	0	0	0	0	0	0	0	0.000843939	0	0	0	0	0	0	0	0	0	0.00943693	0	0	0	0	0	0	0	0	0	0	0	0	0	0	0.00184986	0	0	0	0	0.0468337	0.0184337	0	0	0.00292629	0.0172431
k__Bacteria;p__Proteobacteria;c__Betaproteobacteria;o__Burkholderiales;f__Oxalobacteraceae;g__;s__	0	0.00271264	0	0.0030791	0.00791377	0	0	0	0.0218317	0.00207939	0	0	0.0497924	0.00387184	0.0109951	0.000749299	0.000710959	0.0121714	0.00162128	0	0.003255	0.00961715	0.248506	0.00761209	0.00542103	0.00806435	0.00199748	0.0150732	0	0.000836183	0.00660698	0	0	0	0.00664509	0	0	0.0175737	0.0149906	0	0.0136375	0.0127123	0.0869769	7.395	0.00366596	0.00711288	0	0.00985319
k__Bacteria;p__Proteobacteria;c__Betaproteobacteria;o__Burkholderiales;f__Oxalobacteraceae;g__Cupriavidus;Other	0	0	0	0	0	0	0	0	0	0	0	0	0	0	0.00392684	0.000749299	0	0	0	0	0	0	0	0	0	0	0	0	0	0	0	0	0	0	0	0	0	0.0110992	0	0.00237274	0	0	0	0.0122892	0	0	0.0234103	0
k__Bacteria;p__Proteobacteria;c__Betaproteobacteria;o__Burkholderiales;f__Oxalobacteraceae;g__Janthinobacterium;s__lividum	0	0	0	0	0	0	0	0	0	0	0	0	0.00675151	0.00580776	0.00628294	0	0	0	0.00162128	0	0	0.000874286	0	0	0	0	0	0	0	0	0	0	0	0	0	0	0	0	0	0	0	0.00635617	0	0.00614458	0	0.00355644	0.00292629	0
k__Bacteria;p__Proteobacteria;c__Betaproteobacteria;o__Burkholderiales;f__Oxalobacteraceae;g__Ralstonia;s__	0	0	0	0	0	0	0	0	0.00218317	0	0	0	0	0	0	0	0	0	0	0	0	0	0	0	0.00180701	0	0	0	0	0	0	0	0	0	0	0.00375023	0	0	0	0	0	0.00158904	0	0	0	0	0	0
k__Bacteria;p__Proteobacteria;c__Betaproteobacteria;o__Methylophilales;f__Methylophilaceae;Other;Other	0	0	0	0	0	0	0	0.00138053	0	0.00207939	0	0	0.0801742	0.00774368	0.0204195	0	0.00497672	0.0121714	0.00162128	0.00347711	0.00406875	0	0	0	0	0	0	0	0	0	0	0	0	0	0	0	0	0.00554959	0	0.00395457	0.00389643	0.00476713	0	0.0399398	0.00366596	0	0.0321892	0.0024633
k__Bacteria;p__Proteobacteria;c__Betaproteobacteria;o__Methylophilales;f__Methylophilaceae;g__;s__	0	0	0	0	0	0	0	0	0	0	0	0	0.014347	0.00193592	0	0	0	0	0.000810642	0	0	0	0	0	0	0	0	0	0	0	0	0	0	0	0	0	0	0.000924932	0	0.000790914	0	0	0	0.583735	0	0	0	0
k__Bacteria;p__Proteobacteria;c__Betaproteobacteria;o__Methylophilales;f__Methylophilaceae;g__Methylotenera;s__mobilis	0	0	0	0	0	0.00183412	0	0.00552212	0.0218317	0	0	0	0.013503	0.00580776	0.0801074	0.0142367	0.0113754	0.0608569	0	0.0260783	0.0398737	0.00874286	0	0.00761209	0	0	0	0.00215332	0.00382285	0	0	0	0	0	0	0	0	0.0342225	0	0.0205638	0.0233786	0.00794521	0	0.00921687	0.0109979	0.00355644	0.0526732	0.0320229
k__Bacteria;p__Proteobacteria;c__Betaproteobacteria;o__Neisseriales;f__Neisseriaceae;g__;s__	0	0	0	0	0.00474826	0	0	0.00276106	0	0	0	0	0	0	0	0	0	0.00405712	0	0	0	0	0	0	0	0	0	0	0	0	0	0	0	0	0	0	0	0	0	0	0	0	0	0.0153615	0	0	0	0
k__Bacteria;p__Proteobacteria;c__Betaproteobacteria;o__Neisseriales;f__Neisseriaceae;g__Neisseria;Other	0	0	0	0	0	0	0	0	0	0	0	0	0	0	0	0	0	0	0	0	0.0016275	0	0	0	0	0	0	0	0	0	0	0	0	0	0	0	0	0	0	0	0	0	0	0	0	0	0	0
k__Bacteria;p__Proteobacteria;c__Betaproteobacteria;o__Neisseriales;f__Neisseriaceae;g__Neisseria;s__	0	0.00271264	0	0	0	0	0	0	0	0	0	0	0	0	0	0	0	0	0	0	0.00488249	0	0	0	0	0	0	0	0	0	0	0	0	0	0.0208846	0.0150009	0	0	0	0	0	0	0	0	0	0	0	0
k__Bacteria;p__Proteobacteria;c__Betaproteobacteria;o__Neisseriales;f__Neisseriaceae;g__Neisseria;s__cinerea	0	0.00813791	0	0	0	0	0	0	0	0	0	0	0	0	0	0	0	0	0	0	0	0	0	0	0	0	0	0	0	0	0	0	0	0	0	0.0337521	0	0	0	0	0	0	0	0	0	0	0	0
k__Bacteria;p__Proteobacteria;c__Betaproteobacteria;o__Neisseriales;f__Neisseriaceae;g__Neisseria;s__subflava	0	0	0	0	0	0	0	0	0	0	0	0	0	0	0	0	0	0	0	0	0.0016275	0	0	0	0	0	0	0	0	0	0	0	0	0	0.0018986	0	0	0	0	0	0	0	0	0	0	0	0	0
k__Bacteria;p__Proteobacteria;c__Betaproteobacteria;o__Rhodocyclales;f__Rhodocyclaceae;Other;Other	0	0	0	0.0738985	0	0	0	0	0	0.00207939	0	0	0.00168788	0.00193592	0	0.0029972	0.000710959	0	0	0	0	0	0	0	0	0	0	0	0.00191142	0	0	0	0	0	0	0	0.00213885	0	0	0	0	0	0	0	0	0.00533466	0	0
k__Bacteria;p__Proteobacteria;c__Betaproteobacteria;o__Rhodocyclales;f__Rhodocyclaceae;g__Azospira;s__	0	0	0	0	0	0	0	0.0193274	0.00436634	0	0	0	0	0	0.0424098	0.0014986	0.00924247	0.0182571	0	0	0	0	0	0.00380604	0	0	0	0	0	0	0	0	0	0	0	0	0	0	0	0.00632731	0.00974108	0	0	0	0.00916489	0	0.00877886	0.0147798
k__Bacteria;p__Proteobacteria;c__Betaproteobacteria;o__Rhodocyclales;f__Rhodocyclaceae;g__Dechloromonas;s__	0	0	0	0	0	0	0	0	0	0	0	0	0	0	0	0	0	0.0628854	0	0	0	0	0	0	0	0	0	0	0	0	0	0	0	0	0	0	0	0	0	0	0	0	0	0	0	0	0	0
k__Bacteria;p__Proteobacteria;c__Betaproteobacteria;o__Rhodocyclales;f__Rhodocyclaceae;g__Zoogloea;s__	0	0	0	0	0	0	0	0.00138053	0	0	0	0	0.000843939	0	0.000785367	0.0037465	0.00426576	0	0.000810642	0	0	0	0	0.0152242	0	0.00201609	0	0	0	0	0	0	0	0	0	0	0	0.00184986	0	0	0.00194822	0	0	0	0	0	0	0
k__Bacteria;p__Proteobacteria;c__Betaproteobacteria;o__Thiobacterales;Other;Other;Other	0	0	0	0	0	0	0	0	0	0	0	0	0	0.00387184	0.00157073	0.0052451	0.0035548	0	0	0	0.000813749	0	0	0	0	0	0	0	0	0	0	0	0	0	0	0	0	0	0	0	0	0	0	0	0	0	0	0
k__Bacteria;p__Proteobacteria;c__Betaproteobacteria;o__Thiobacterales;f__;g__;s__	0	0	0	0	0	0	0	0	0	0	0	0	0	0	0	0.0022479	0	0	0	0	0	0	0	0.00380604	0	0	0	0	0	0	0	0	0	0	0	0	0	0	0	0	0	0	0	0	0	0	0	0
k__Bacteria;p__Proteobacteria;c__Deltaproteobacteria;o__Bdellovibrionales;f__Bacteriovoracaceae;g__;s__	0	0	0	0	0	0	0	0	0	0	0	0	0.00337576	0	0	0	0	0	0	0	0	0	0	0	0	0	0	0	0	0	0	0	0	0	0	0	0	0	0	0	0	0	0	0.0675904	0	0	0	0
k__Bacteria;p__Proteobacteria;c__Deltaproteobacteria;o__Desulfovibrionales;f__Desulfovibrionaceae;Other;Other	0	0	0	0	0	0	0	0	0	0	0	0	0	0	0	0	0	0	0.000810642	0.00173856	0	0	0	0	0.0144561	0	0	0	0	0	0	0	0	0	0	0	0	0	0	0	0	0	0	0	0.00183298	0	0	0
k__Bacteria;p__Proteobacteria;c__Deltaproteobacteria;o__Desulfovibrionales;f__Desulfovibrionaceae;g__;s__	0	0	0.117474	0.0708193	0.596698	0.0641943	0	0	0.00218317	0.010397	0.00786361	0.337509	0.000843939	0	0.195556	0.0734313	0	0	0.000810642	0	0	0	0.0125826	0	0	0.0302413	0	2.7584	1.64765	0.0434815	0	0.0382068	0	0.437494	0	0	0	0	0	0	0	0	0	0	0.00183298	0	0	0
k__Bacteria;p__Proteobacteria;c__Deltaproteobacteria;o__Desulfovibrionales;f__Desulfovibrionaceae;g__Bilophila;s__	0	0	0.00927429	0.00153955	0	0	0	0	0.00218317	0.00207939	0.00943634	0.0416923	0.00590757	0.0406543	0.0157073	0.0022479	0	0	0.714176	0.752795	0.0886987	0.112783	0.119534	0.0190302	2.37441	0.167335	0.151809	0.137812	0.0420513	0.00585328	0.0363384	0	0	0	0	0	0.20533	0.0323726	0.00428302	0.00237274	0.664342	0.486247	0.0434884	0.0522289	0.615881	0.0337862	0.251661	0.00738989
k__Bacteria;p__Proteobacteria;c__Deltaproteobacteria;o__Desulfovibrionales;f__Desulfovibrionaceae;g__Desulfovibrio;Other	0.00501765	0	0	0	0	0	0	0.00828317	0.0196485	0.0249527	0	0.00198535	0.00168788	0.00967961	0	0	0	0	0.0291831	0.0295555	0	0.00174857	0	0	0	0	0	0	0	0.0117066	0.00330349	0	0	0	0	0	0	0	0	0	0	0	0.00334526	0	0.00183298	0.00355644	0	0
k__Bacteria;p__Proteobacteria;c__Deltaproteobacteria;o__Desulfovibrionales;f__Desulfovibrionaceae;g__Desulfovibrio;s__	4.06597	1.86087	0.979983	0.329464	0.0443171	0.128389	0.0887544	2.47253	4.29866	3.90302	0.550453	0.214418	0.346015	3.2175	0.0541903	0.0269748	0.0312822	0.0283999	5.50345	11.8344	0.151357	2.65608	0.710915	0.129405	0.576437	0.133062	0.297625	0.564169	0.105128	1.69244	3.03921	2.14977	3.76129	0.627543	1.96979	2.4414	0.143303	0.0721447	0.0728114	0.275238	0.261061	0.220877	2.00381	0.236566	2.27473	0.334305	0.500395	1.08139
k__Bacteria;p__Proteobacteria;c__Deltaproteobacteria;o__Desulfovibrionales;f__Desulfovibrionaceae;g__Desulfovibrio;s__C21_c20	0.0100353	0.00542527	0.00154571	0	0	0.00366824	0	0.00138053	0.0065495	0.0145557	0	0.00198535	0.00168788	0.00967961	0	0	0.000710959	0	0.00810642	0.0365097	0	0.00699429	0	0	0	0	0	0.00215332	0	0.00919802	0.00660698	0	0.00438635	0	0	0	0	0.000924932	0	0.000790914	0.00389643	0	0.00334526	0	0	0	0	0.0024633
k__Bacteria;p__Proteobacteria;c__Deltaproteobacteria;o__Myxococcales;f__;g__;s__	0	0	0	0	0	0	0	0	0	0	0	0	0	0	0	0	0	0	0	0	0	0.00174857	0	0	0	0	0	0	0	0	0	0	0	0	0	0	0	0	0	0	0	0	0	0	0	0	0	0
k__Bacteria;p__Proteobacteria;c__Epsilonproteobacteria;o__Campylobacterales;f__Helicobacteraceae;Other;Other	0	0	0	0	0	0	0	0	0	0	0	0	0	0	0	0	0	0	0	0	0	0	0	0	0	0	0	0.00430663	0.00191142	0	0	0	0	0	0.00284789	0	0	0	0	0	0	0	0	0	0	0	0	0
k__Bacteria;p__Proteobacteria;c__Epsilonproteobacteria;o__Campylobacterales;f__Helicobacteraceae;g__Flexispira;Other	0	0	0.00618286	0	0.00158275	0.0201753	0	0	0	0	0	0.00198535	0	0	0.0023561	0	0	0	0	0	0	0	0	0	0	0	0	0.0129199	0.0382285	0.000836183	0	0	0.0087727	0	0.0132902	0	0	0	0	0	0	0	0	0	0	0	0	0
k__Bacteria;p__Proteobacteria;c__Epsilonproteobacteria;o__Campylobacterales;f__Helicobacteraceae;g__Flexispira;s__	0	0	0.00154571	0	0	0.00366824	0	0	0	0	0	0	0	0	0	0	0	0	0	0	0	0	0.00314564	0	0	0	0	0.0215332	0.0324942	0	0	0	0.0109659	0.00382648	0.00949298	0	0	0	0	0	0	0	0	0	0	0	0	0
k__Bacteria;p__Proteobacteria;c__Epsilonproteobacteria;o__Campylobacterales;f__Helicobacteraceae;g__Helicobacter;s__	0	0	1.40969	0	0.702743	3.75995	0.0247348	0.00414159	0.0196485	0.00207939	0.0110091	0.339495	0	0.0174233	0.587455	0.0022479	0.00213288	0.0223142	0.000810642	0	0.0113925	0.000874286	1.21736	0.0723148	0	0.00403218	0.0239698	4.44444	12.8868	0.00167237	0.0297314	0.308202	2.20414	0.422188	7.86683	0.0562535	0	0.000924932	0.00214151	0	0.0214304	0.433808	0	0.125964	0	0.00533466	0.0380417	0
k__Bacteria;p__Proteobacteria;c__Gammaproteobacteria;o__;f__;g__;s__	0	0	0	0	0	0	0	0	0	0	0	0	0	0	0	0.000749299	0.0035548	0	0	0	0	0	0	0	0	0	0	0	0	0	0	0	0	0	0	0	0	0	0	0	0	0	0	0	0	0	0	0
k__Bacteria;p__Proteobacteria;c__Gammaproteobacteria;o__Aeromonadales;f__Aeromonadaceae;g__;s__	0	0	0	0	0	0	0	0	0	0	0	0	0	0	0	0	0	0	0	0	0	0	0	0	0	0	0.00199748	0	0	0	0	0	0	0	0	0.00375023	0	0	0	0	0	0	0	0	0	0	0	0
k__Bacteria;p__Proteobacteria;c__Gammaproteobacteria;o__Aeromonadales;f__Succinivibrionaceae;g__Succinivibrio;s__	0	0	0	0	0	0	0	0	0	0	0.00943634	0	0	0	0	0	0	0	0	0	0	0	0	0	0	0	0	0	0	0	0	0	0	0	0	0	0	0	0	0	0	0	0	0	0	0	0	0
k__Bacteria;p__Proteobacteria;c__Gammaproteobacteria;o__Alteromonadales;f__Alteromonadaceae;g__Cellvibrio;s__	0	0	0	0	0	0	0	0	0	0	0	0	0	0	0	0	0	0	0	0	0	0.00174857	0	0	0	0	0	0	0	0	0	0	0	0	0	0	0	0	0	0	0	0	0	0	0	0	0	0.00738989
k__Bacteria;p__Proteobacteria;c__Gammaproteobacteria;o__Alteromonadales;f__HTCC2188;g__HTCC;s__	0	0	0	0	0	0	0	0	0	0	0	0	0	0.00387184	0	0	0	0	0	0	0	0	0	0	0	0	0	0	0	0	0	0	0	0	0	0	0	0	0	0	0	0	0	0	0	0	0	0
k__Bacteria;p__Proteobacteria;c__Gammaproteobacteria;o__Alteromonadales;f__Shewanellaceae;g__Shewanella;s__	0	0	0	0	0	0	0	0	0	0	0	0	0.0286939	0.00967961	0	0	0	0	0	0	0	0	0	0	0	0	0	0	0	0	0	0	0	0	0	0	0.00427771	0	0	0	0	0.00317808	0	0.0368675	0.00183298	0.00355644	0	0
k__Bacteria;p__Proteobacteria;c__Gammaproteobacteria;o__Alteromonadales;f__[Chromatiaceae];g__;s__	0	0	0	0	0	0	0	0	0	0	0	0	0.00843939	0	0	0	0	0	0.00243193	0	0	0	0	0	0	0	0	0	0	0	0	0	0	0	0	0	0	0	0	0	0	0	0	0	0	0	0	0
k__Bacteria;p__Proteobacteria;c__Gammaproteobacteria;o__Alteromonadales;f__[Chromatiaceae];g__Rheinheimera;s__	0	0	0	0	0	0	0	0	0	0	0	0	0.0126591	0	0	0	0	0	0	0	0	0	0	0	0	0	0	0	0	0	0	0	0	0.0318873	0	0	0	0	0	0	0	0	0	0	0	0	0	0
k__Bacteria;p__Proteobacteria;c__Gammaproteobacteria;o__Chromatiales;f__;g__;s__	0	0	0	0	0	0	0	0	0	0	0	0	0	0.00193592	0	0	0	0	0	0.00173856	0	0	0	0	0	0	0	0	0	0	0	0	0	0	0	0	0	0	0	0	0	0	0	0	0	0	0	0
k__Bacteria;p__Proteobacteria;c__Gammaproteobacteria;o__Chromatiales;f__Ectothiorhodospiraceae;g__Halorhodospira;s__	0	0	0	0	0	0	0	0	0	0	0	0	0	0	0	0	0	0	0	0	0	0	0	0	0	0	0	0	0	0	0	0	0	0	0	0	0	0	0	0	0.00389643	0	0	0	0	0	0	0
k__Bacteria;p__Proteobacteria;c__Gammaproteobacteria;o__Enterobacteriales;f__Enterobacteriaceae;Other;Other	0.00501765	0.0149195	0	0.0261724	0.00633102	0.00183412	0	0.0427964	0.222683	0.00831756	0.045609	0.0119121	0	0.00193592	0.0306293	0.00674369	0.102378	0.0811425	0.00891706	0.126915	0.01953	0.00874286	0.0283108	0.00761209	0	0.0100804	0.0159799	0.00861326	0.00382285	0.00250855	0.00991048	0.160469	0.0328976	0.00382648	0.0560086	0.225014	0	0.0610455	0	0.0110728	0.00584465	0.0190685	0.00669053	0.10753	0	0	0.0907149	0.0443393
k__Bacteria;p__Proteobacteria;c__Gammaproteobacteria;o__Enterobacteriales;f__Enterobacteriaceae;g__;s__	0.123769	0.111218	0.0154571	0.0554238	0.0395689	0.0623601	0.0523796	0.125628	0.416985	0.0935726	0.0896452	0.0337509	0	0.0174233	0.262313	0.059944	0.835377	1.20497	0.0129703	0.385959	0.157054	0.131143	0.235923	0.0723148	0.0325262	0.0705631	0.0479396	0.0322997	0.049697	0.0100342	0.0561594	0.234335	0.0570225	0.0178569	0.183215	1.11382	0	0.574383	0.0214151	0.105192	0.0311715	0.0730959	0.0434884	0.835663	0.0201628	0.0177822	0.673046	0.21677
k__Bacteria;p__Proteobacteria;c__Gammaproteobacteria;o__Enterobacteriales;f__Enterobacteriaceae;g__Citrobacter;s__	0	0	0	0	0	0	0	0	0	0	0	0	0	0	0.00157073	0	0.000710959	0.00202856	0	0	0	0	0	0	0	0	0	0	0	0	0	0	0	0	0	0	0	0.000924932	0	0	0	0	0	0	0	0	0	0
k__Bacteria;p__Proteobacteria;c__Gammaproteobacteria;o__Enterobacteriales;f__Enterobacteriaceae;g__Enterobacter;Other	0	0	0	0	0	0	0	0	0	0	0	0	0	0	0	0	0.000710959	0	0	0	0	0	0	0	0	0	0	0	0	0	0	0	0	0	0	0	0	0.000924932	0	0	0	0	0	0	0	0	0	0
k__Bacteria;p__Proteobacteria;c__Gammaproteobacteria;o__Enterobacteriales;f__Enterobacteriaceae;g__Erwinia;s__	0	0	0	0	0	0	0	0	0	0	0	0	0	0	0	0	0	0	0	0	0	0	0	0	0	0	0	0	0	0	0.00330349	0	0	0	0	0	0	0	0	0	0	0	0	0	0	0	0	0.0024633
k__Bacteria;p__Proteobacteria;c__Gammaproteobacteria;o__Enterobacteriales;f__Enterobacteriaceae;g__Klebsiella;s__	0	0	0	0	0	0	0	0	0.0065495	0	0.00314545	0	0	0	0.000785367	0.000749299	0.00568768	0	0	0.00173856	0.00244125	0	0	0	0	0	0	0	0	0	0	0	0	0	0.0018986	0.00375023	0	0.00184986	0	0.000790914	0	0	0	0.00307229	0	0.00177822	0.00877886	0
k__Bacteria;p__Proteobacteria;c__Gammaproteobacteria;o__Enterobacteriales;f__Enterobacteriaceae;g__Pantoea;s__agglomerans	0	0	0	0	0	0	0	0	0	0	0	0	0	0	0	0	0.00213288	0	0	0	0	0	0	0	0	0	0	0	0	0	0	0	0	0	0.000949298	0	0	0	0	0	0	0	0	0.00307229	0	0	0	0
k__Bacteria;p__Proteobacteria;c__Gammaproteobacteria;o__Enterobacteriales;f__Enterobacteriaceae;g__Salmonella;Other	0	0	0	0	0	0	0	0	0	0	0	0.00198535	0	0	0	0	0	0.00202856	0	0	0	0	0	0	0	0	0	0	0	0	0	0	0	0	0	0	0	0	0	0.000790914	0	0	0.00669053	0	0	0	0	0
k__Bacteria;p__Proteobacteria;c__Gammaproteobacteria;o__Enterobacteriales;f__Enterobacteriaceae;g__Serratia;s__marcescens	0.00167255	0	0	0	0	0	0.00145499	0	0.00218317	0	0.00786361	0	0.00253182	0	0	0.000749299	0	0	0	0	0	0.00262286	0	0	0	0	0	0	0	0	0	0	0	0	0	0.00750047	0	0	0	0	0	0	0.0234169	0	0.00366596	0	0	0
k__Bacteria;p__Proteobacteria;c__Gammaproteobacteria;o__Legionellales;f__;g__;s__	0	0	0	0	0	0	0	0	0	0	0	0	0	0.00193592	0.0212049	0.0044958	0.0135082	0	0	0	0.0113925	0.000874286	0	0	0	0	0	0	0	0	0	0	0	0	0	0	0	0.0462466	0	0	0.00779287	0.00158904	0	0.218133	0	0	0.0321892	0
k__Bacteria;p__Proteobacteria;c__Gammaproteobacteria;o__Legionellales;f__Coxiellaceae;g__Rickettsiella;s__	0	0	0	0	0	0	0	0	0	0	0	0	0	0	0	0	0	0	0	0	0	0.00174857	0	0	0	0	0	0	0	0	0	0	0	0	0	0	0	0	0	0	0	0	0	0	0	0	0	0
k__Bacteria;p__Proteobacteria;c__Gammaproteobacteria;o__Legionellales;f__Legionellaceae;g__;s__	0	0	0	0	0	0	0	0	0	0	0	0	0	0	0	0	0	0.0365141	0	0	0	0	0	0	0	0	0	0	0	0	0	0	0	0	0	0	0	0	0	0	0	0	0	0	0	0	0	0
k__Bacteria;p__Proteobacteria;c__Gammaproteobacteria;o__Legionellales;f__Legionellaceae;g__Legionella;s__	0	0	0	0	0	0	0	0	0	0	0	0	0	0	0	0.000749299	0	0.0263713	0	0	0	0	0	0.00380604	0	0	0	0	0	0	0	0	0	0	0	0	0	0	0	0	0	0	0	0	0	0	0	0
k__Bacteria;p__Proteobacteria;c__Gammaproteobacteria;o__Pasteurellales;f__Pasteurellaceae;Other;Other	0	0	0	0	0	0	0	0	0	0	0	0	0	0	0.0023561	0.000749299	0.00142192	0	0	0	0	0	0.157282	0	0	0	0	0	0	0	0	0	0	0	0	0	0	0	0.00428302	0.00711823	0	0	0.0234169	0.00307229	0	0.0444555	0.0263366	0.0985319
k__Bacteria;p__Proteobacteria;c__Gammaproteobacteria;o__Pasteurellales;f__Pasteurellaceae;g__;s__	0	0	0	0	0	0	0	0	0	0	0	0	0	0	0	0	0	0	0	0	0	0	0.0220195	0	0	0	0	0	0	0	0	0	0	0	0	0	0	0	0	0.00316366	0	0	0	0.00307229	0	0.00355644	0.0117051	0.0468026
k__Bacteria;p__Proteobacteria;c__Gammaproteobacteria;o__Pasteurellales;f__Pasteurellaceae;g__Actinobacillus;Other	0	0	0	0	0	0	0	0	0	0	0	0	0	0	0	0	0	0	0	0	0	0	0	0	0	0	0	0	0	0	0	0	0	0	0	0	0	0	0	0	0	0	0.00669053	0	0	0	0	0
k__Bacteria;p__Proteobacteria;c__Gammaproteobacteria;o__Pasteurellales;f__Pasteurellaceae;g__Actinobacillus;s__	0	0	0	0	0	0	0	0	0	0	0	0	0	0	0	0	0	0	0	0	0	0	0	0	0	0	0	0	0	0	0	0	0	0	0	0	0	0	0	0	0	0	0.0568695	0	0	0	0	0
k__Bacteria;p__Proteobacteria;c__Gammaproteobacteria;o__Pasteurellales;f__Pasteurellaceae;g__Haemophilus;s__	0	0	0	0	0	0	0	0	0	0	0	0	0	0	0	0	0	0	0	0	0	0	0.0157282	0	0	0	0	0	0	0	0	0	0	0	0	0	0	0	0	0.000790914	0	0	0	0	0	0.00177822	0	0.00738989
k__Bacteria;p__Proteobacteria;c__Gammaproteobacteria;o__Pasteurellales;f__Pasteurellaceae;g__Haemophilus;s__parainfluenzae	0	0	0	0	0	0	0	0	0	0	0	0	0	0	0	0	0	0	0	0	0	0.00349715	0	0	0	0	0	0	0	0	0	0	0	0	0	0	0	0	0	0	0	0	0.110394	0	0	0	0	0
k__Bacteria;p__Proteobacteria;c__Gammaproteobacteria;o__Pasteurellales;f__Pasteurellaceae;g__Mannheimia;s__	0	0	0	0	0	0	0	0	0	0	0	0	0	0	0	0	0	0	0	0	0	0	0.0377477	0	0	0	0	0	0	0	0	0	0	0	0	0	0	0	0	0.000790914	0	0	0	0.0122892	0	0.00533466	0.0146314	0.0541925
k__Bacteria;p__Proteobacteria;c__Gammaproteobacteria;o__Pseudomonadales;Other;Other;Other	0	0	0	0	0	0	0	0	0	0	0	0	0	0	0.000785367	0	0	0	0	0	0.000813749	0	0	0	0	0.00201609	0	0	0	0	0	0	0	0	0	0	0	0	0	0	0	0	0	0	0.00183298	0	0.00292629	0
k__Bacteria;p__Proteobacteria;c__Gammaproteobacteria;o__Pseudomonadales;f__Moraxellaceae;g__;s__	0	0	0.00154571	0.00153955	0	0	0	0	0	0	0	0	0	0	0	0	0	0.00405712	0	0	0	0	0.00314564	0	0	0	0	0	0	0	0	0	0.00219317	0.00637747	0	0.00375023	0	0.000924932	0.00214151	0	0	0	0	0	0	0	0.00292629	0
k__Bacteria;p__Proteobacteria;c__Gammaproteobacteria;o__Pseudomonadales;f__Moraxellaceae;g__Acinetobacter;s__	0	0.00271264	0	0.030791	0.00158275	0	0	0.00552212	0.0218317	0.0187145	0.0141545	0.00992674	0.00168788	0	0	0	0	1.61879	0	0	0	0.0699429	0.207612	0	0.0108421	0.0141126	0.00798993	0.0107666	0	0.000836183	0.0561594	0	0	0	0.000949298	0.210013	0.0106943	0	0.0107076	0.000790914	0	0.0111233	0	0.00307229	0.00366596	0.00177822	0.0321892	0
k__Bacteria;p__Proteobacteria;c__Gammaproteobacteria;o__Pseudomonadales;f__Moraxellaceae;g__Acinetobacter;s__johnsonii	0	0	0	0.0200142	0	0	0	0.0262301	0.0174653	0.010397	0.00786361	0.00595604	0	0	0	0.0014986	0	0.0141999	0	0	0	0.0148629	0	0	0.00361402	0.00806435	0.00998742	0	0	0.000836183	0	0	0	0	0.00569579	0	0	0	0	0.00158183	0	0	0	0	0	0	0	0
k__Bacteria;p__Proteobacteria;c__Gammaproteobacteria;o__Pseudomonadales;f__Moraxellaceae;g__Acinetobacter;s__lwoffii	0	0	0	0.0030791	0	0	0	0	0	0	0	0	0	0	0	0	0	0.170399	0	0	0	0	0	0	0	0	0	0	0	0	0	0	0	0	0	0	0	0	0	0	0	0.00158904	0	0	0	0	0	0
k__Bacteria;p__Proteobacteria;c__Gammaproteobacteria;o__Pseudomonadales;f__Moraxellaceae;g__Acinetobacter;s__rhizosphaerae	0	0	0	0	0	0	0	0.00828317	0	0	0	0	0	0	0.0023561	0	0	0.00202856	0	0	0	0	0	0	0	0	0	0	0.00191142	0	0.019821	0	0	0	0	0	0	0	0	0	0	0.00317808	0	0	0	0	0	0
k__Bacteria;p__Proteobacteria;c__Gammaproteobacteria;o__Pseudomonadales;f__Moraxellaceae;g__Alkanindiges;s__	0	0	0	0	0	0	0	0	0	0	0	0	0.00168788	0	0	0	0	0	0	0	0	0	0	0	0	0	0	0	0	0	0	0	0	0	0	0	0	0	0	0	0	0	0	0	0	0	0	0
k__Bacteria;p__Proteobacteria;c__Gammaproteobacteria;o__Pseudomonadales;f__Moraxellaceae;g__Enhydrobacter;s__	0	0	0.00154571	0.0153955	0.389358	0.00917061	0.0160049	0.0828317	0.026198	0.00207939	0.00314545	0.00198535	0	0.0271029	0.903957	0.116141	0.0504781	0.186628	0	0.222535	0.0813749	0.00961715	0.371186	0.0608967	0	0.00201609	0.00199748	0.122739	0.00573427	0	0.0165175	0	0	0.256374	0.0617044	0.101256	0.00427771	0.448592	0.0385472	0.100446	0.0155857	0.0699178	0.110394	0.522289	0.0421585	0.0657942	1.93135	0.182284
k__Bacteria;p__Proteobacteria;c__Gammaproteobacteria;o__Pseudomonadales;f__Moraxellaceae;g__Perlucidibaca;s__	0	0	0	0	0	0	0	0	0	0	0	0	0.0227863	0.00193592	0	0	0	0	0	0	0	0	0	0	0	0	0	0	0	0	0	0	0	0	0	0	0	0	0	0	0	0.0111233	0	0.0399398	0	0	0	0
k__Bacteria;p__Proteobacteria;c__Gammaproteobacteria;o__Pseudomonadales;f__Pseudomonadaceae;Other;Other	0	0	0	0	0	0	0.00145499	0.00138053	0.00436634	0.00207939	0.00157272	0	0.00337576	0.00193592	0.00628294	0.0014986	0.00924247	0.00608569	0.000810642	0	0.00488249	0	0.00629129	0.0152242	0.00180701	0.00806435	0	0.00215332	0.00191142	0.00167237	0	0.00254712	0.00219317	0.0127549	0.00284789	0.0150009	0.00213885	0.00832439	0	0	0.00194822	0.00158904	0.00334526	0.0860241	0	0.00355644	0.00585257	0.0024633
k__Bacteria;p__Proteobacteria;c__Gammaproteobacteria;o__Pseudomonadales;f__Pseudomonadaceae;g__;s__	0.00167255	0.00135632	0	0.0061582	0.00474826	0.00183412	0.00436497	0.0096637	0.0196485	0.0187145	0.00629089	0.00198535	0.00337576	0.00967961	0.243464	0.014986	0.0213288	0.0953424	0.00162128	0.0452025	0.0634724	0.0104914	0.044039	0.0152242	0.00542103	0.00403218	0.00199748	0.161499	0.01338	0	0.00991048	0.00254712	0	0.176018	0.025631	0.0300019	0.00213885	0.082319	0.00642453	0.018191	0.00974108	0.0286028	0.0234169	0.110602	0.00366596	0.0213386	0.158019	0.0270963
k__Bacteria;p__Proteobacteria;c__Gammaproteobacteria;o__Pseudomonadales;f__Pseudomonadaceae;g__Pseudomonas;Other	0.00501765	0	0.00309143	0.00461865	0.00316551	0.00183412	0.00290998	0.00414159	0.0065495	0.00207939	0.00471817	0.0039707	0.00168788	0	0.00314147	0.0037465	0.00213288	0.0121714	0.000810642	0.00347711	0.0016275	0.00437143	0.00314564	0.00761209	0.00361402	0.00604827	0	0	0	0.00167237	0.00660698	0.00254712	0.00219317	0.0357138	0.00474649	0.00750047	0.00213885	0.00739946	0	0.00237274	0	0.00635617	0.00669053	0.00614458	0	0.00533466	0.00585257	0.00492659
k__Bacteria;p__Proteobacteria;c__Gammaproteobacteria;o__Pseudomonadales;f__Pseudomonadaceae;g__Pseudomonas;s__	0.643931	1.08505	4.31563	3.00982	3.13385	0.539232	3.83535	3.52173	2.90361	1.27675	2.9866	0.994659	0.909766	0.98732	12.1622	0.971841	2.19758	8.05136	0.891706	3.4493	4.91586	1.18816	35.5269	2.91924	3.62848	3.30034	1.30635	8.55512	1.83497	0.360395	3.27706	4.73001	1.40363	42.303	9.88979	17.2248	1.10365	15.7738	2.14579	2.63849	4.35037	3.43869	14.4917	16.2156	1.8898	2.93051	16.2819	7.93182
k__Bacteria;p__Proteobacteria;c__Gammaproteobacteria;o__Pseudomonadales;f__Pseudomonadaceae;g__Pseudomonas;s__fragi	0	0	0	0	0	0	0	0	0	0	0	0	0.00421969	0	0	0	0	0	0	0	0	0	0	0	0	0	0	0	0	0	0	0	0	0	0	0	0	0	0	0	0	0.00476713	0	0	0	0	0	0
k__Bacteria;p__Proteobacteria;c__Gammaproteobacteria;o__Pseudomonadales;f__Pseudomonadaceae;g__Pseudomonas;s__stutzeri	0	0	0	0	0	0	0	0	0	0	0	0	0.000843939	0.00193592	0	0	0	0.00202856	0	0	0	0	0	0	0	0	0	0	0	0	0	0	0	0.00382648	0	0	0	0	0	0	0	0	0	0	0	0	0	0
k__Bacteria;p__Proteobacteria;c__Gammaproteobacteria;o__Pseudomonadales;f__Pseudomonadaceae;g__Pseudomonas;s__veronii	0	0	0.00154571	0	0.00158275	0.00183412	0	0.00138053	0	0	0.00314545	0	0.00168788	0	0.00549757	0	0.000710959	0	0.00162128	0.00173856	0.000813749	0	0.00629129	0	0.00361402	0.00201609	0	0.00215332	0.00382285	0	0.00330349	0.00509424	0.00438635	0.0178569	0.00569579	0.00375023	0.00213885	0.00462466	0	0	0.00389643	0	0.00669053	0.00307229	0.00366596	0.00177822	0.0117051	0
k__Bacteria;p__Proteobacteria;c__Gammaproteobacteria;o__Thiotrichales;f__Piscirickettsiaceae;g__;s__	0	0	0	0	0	0	0	0	0	0	0	0	0.00168788	0	0	0	0	0	0	0	0	0	0	0	0	0	0	0	0	0	0	0	0	0	0	0	0	0	0	0	0	0	0	0	0	0	0	0
k__Bacteria;p__Proteobacteria;c__Gammaproteobacteria;o__Xanthomonadales;f__Sinobacteraceae;g__;s__	0	0	0	0	0	0	0	0	0	0	0	0	0	0	0	0	0	0	0	0	0.00244125	0	0.154137	0	0.0144561	0	0.00199748	0	0	0	0	0	0	0	0.0265803	0	0	0	0	0	0	0	0	0	0	0	0	0
k__Bacteria;p__Proteobacteria;c__Gammaproteobacteria;o__Xanthomonadales;f__Xanthomonadaceae;Other;Other	0	0	0.00154571	0.0061582	0	0	0.00145499	0	0	0	0	0	0	0	0	0	0	0	0	0	0	0	0	0	0	0	0	0	0	0	0	0	0	0	0	0	0.00213885	0	0	0	0	0.00158904	0	0	0	0	0	0
k__Bacteria;p__Proteobacteria;c__Gammaproteobacteria;o__Xanthomonadales;f__Xanthomonadaceae;g__;s__	0	0	0	0.0184746	0	0.00183412	0.00290998	0	0	0	0	0	0	0	0	0	0	0.00811425	0	0	0	0.00524572	0.264234	0.00380604	0.00180701	0	0	0	0.00191142	0	0.00660698	0	0	0.00127549	0	0	0	0	0	0	0	0.00476713	0	0.00614458	0	0	0	0
k__Bacteria;p__Proteobacteria;c__Gammaproteobacteria;o__Xanthomonadales;f__Xanthomonadaceae;g__Luteibacter;s__rhizovicinus	0	0	0	0.0030791	0	0	0	0	0	0	0	0	0	0	0	0	0	0	0	0	0	0.00262286	0	0	0	0	0	0	0	0	0	0	0	0	0	0	0	0	0	0	0	0	0	0	0	0	0	0
k__Bacteria;p__Proteobacteria;c__Gammaproteobacteria;o__Xanthomonadales;f__Xanthomonadaceae;g__Lysobacter;s__	0	0	0	0	0	0	0	0.00552212	0	0	0	0	0.00421969	0	0	0	0	0	0	0	0	0	0	0	0	0	0	0	0	0	0.00660698	0	0	0	0	0	0	0	0	0	0	0.0127123	0	0	0	0	0	0
k__Bacteria;p__Proteobacteria;c__Gammaproteobacteria;o__Xanthomonadales;f__Xanthomonadaceae;g__Stenotrophomonas;Other	0	0	0	0	0	0	0	0	0	0	0	0	0	0	0	0	0	0.00202856	0	0	0	0	0.0283108	0	0.00180701	0	0	0	0	0	0	0	0	0	0	0	0	0	0	0	0	0	0	0	0	0	0	0
k__Bacteria;p__Proteobacteria;c__Gammaproteobacteria;o__Xanthomonadales;f__Xanthomonadaceae;g__Stenotrophomonas;s__	0	0	0	0.0030791	0	0	0	0	0	0	0	0	0	0	0	0	0	0.0101428	0	0	0	0	0	0	0	0	0	0	0	0	0	0	0	0	0	0	0	0	0	0	0	0	0	0	0	0	0	0
k__Bacteria;p__Proteobacteria;c__Gammaproteobacteria;o__Xanthomonadales;f__Xanthomonadaceae;g__Stenotrophomonas;s__acidaminiphila	0	0	0	0	0.00316551	0	0	0	0	0	0	0	0	0	0	0	0	0	0	0	0	0	0	0	0	0	0	0	0	0	0	0	0	0	0	0	0	0	0	0	0	0	0	0	0	0	0	0
k__Bacteria;p__Proteobacteria;c__Gammaproteobacteria;o__Xanthomonadales;f__Xanthomonadaceae;g__Thermomonas;s__fusca	0	0	0.0340057	0	0	0	0.0160049	0	0	0	0	0	0	0	0	0	0	0	0	0	0	0	0	0	0	0	0	0	0	0	0	0	0	0	0	0	0.00213885	0	0	0	0	0	0	0	0	0	0	0
k__Bacteria;p__TM6;c__SJA-4;o__;f__;g__;s__	0	0.00678159	0	0.00461865	0	0	0	0.0151858	0	0	0	0	0	0	0	0.0134874	0.087448	0.00608569	0	0.00695422	0.0382462	0.00786858	0	0.0152242	0.00180701	0	0	0.0129199	0	0	0	0	0	0	0	0	0.00641656	0.107292	0	0.0118637	0.0253268	0.0444932	0.0234169	0.307229	0.00366596	0.0106693	0.061452	0
k__Bacteria;p__TM7;c__;o__;f__;g__;s__	0	0	0	0	0	0	0	0	0	0	0	0	0	0	0	0	0	0.00405712	0	0	0	0	0	0	0	0	0	0	0	0	0	0	0	0	0	0	0	0	0	0	0	0	0	0	0	0	0	0
k__Bacteria;p__TM7;c__SC3;o__;f__;g__;s__	0	0	0	0	0	0	0	0	0	0.00207939	0	0	0	0	0	0	0	0.00405712	0	0	0	0	0	0	0	0	0.00199748	0	0	0	0	0	0	0	0	0	0	0	0	0	0	0	0	0	0	0	0	0
k__Bacteria;p__TM7;c__TM7-1;o__;f__;g__;s__	0	0	0	0	0	0	0.0101849	0	0.00218317	0	0	0	0	0	0	0	0	0	0	0	0	0.00349715	0	0	0.00180701	0	0	0	0	0	0	0	0	0	0	0	0	0	0	0	0	0	0	0	0	0	0	0
k__Bacteria;p__TM7;c__TM7-3;o__;f__;g__;s__	0	0	0	0	0	0.0110047	0	0	0	0.00207939	0	0	0	0	0	0	0	0	0	0	0	0	0	0	0	0	0	0	0	0	0.0231244	0	0	0	0	0	0	0	0	0	0	0	0	0.00921687	0	0	0	0
k__Bacteria;p__TM7;c__TM7-3;o__CW040;f__F16;g__;s__	0.0217431	0.00949423	0.163846	0.181667	0.0648929	0.014673	0.110579	0	0.0065495	0.0166351	0.128963	0.150886	0.00928333	0.0212951	0.0047122	0.0029972	0	0	0	0	0.042315	0.45288	0.125826	0.175078	0	0.0423379	0.00399497	0.232558	0.00955712	0.00250855	0	0.00509424	0	0	0	0	0	0.000924932	0.15633	0.037173	0.089618	0.128712	0.0434884	0.165904	0.0531564	0.0231169	0.0555994	0.0689723
k__Bacteria;p__Tenericutes;c__Mollicutes;o__Anaeroplasmatales;f__Anaeroplasmataceae;g__Anaeroplasma;s__	0.0033451	0	0	0	0	0.00550237	0	0	0	0	0	0	0	0	0	0	0	0	0	0	0	0	0	0	0	0	0	0	0	0	0	0	0	0	0	0	0	0.0443968	0	0.000790914	0.0116893	0.0238356	0.0568695	0.0491567	0	0.00177822	0.020484	0
k__Bacteria;p__Tenericutes;c__Mollicutes;o__RF39;f__;g__;s__	0.0167255	0.113931	0.00154571	0	0.0221586	0.0458531	0.0712945	0.00276106	0.00436634	0.0311909	0	0	0	0	0	0	0	0.00202856	0	0	0.000813749	0	0	0	0.00722804	0.00604827	0	0	0.0152914	0.00418092	0	0	0	0	0	0	0	0.0656702	0	0	0.00389643	0	0	0.0368675	0.00366596	0	0.0117051	0
k__Bacteria;p__Verrucomicrobia;c__Opitutae;o__Opitutales;f__Opitutaceae;g__;s__	0	0	0	0	0	0	0	0	0	0	0	0	0	0	0	0	0	0	0	0	0	0	0	0	0	0	0	0	0	0	0	0	0	0.109692	0	0	0	0	0	0	0	0	0	0	0	0	0	0
k__Bacteria;p__Verrucomicrobia;c__Opitutae;o__Opitutales;f__Opitutaceae;g__Opitutus;s__	0	0	0	0	0	0	0	0	0	0	0	0	0	0	0	0	0	0	0	0	0	0	0	0	0	0	0	0	0	0	0	0	0	0	0	0	0	0	0	0	0	0	0	0	0	0	0	0.00738989
k__Bacteria;p__Verrucomicrobia;c__Verrucomicrobiae;o__Verrucomicrobiales;f__Verrucomicrobiaceae;g__Akkermansia;s__muciniphila	0.0685745	0.00542527	0.0123657	0.0061582	0.00633102	0.00733649	0.00436497	0.00138053	0.0567624	0.0207939	0.00786361	0.0119121	0.00253182	0.00580776	3.77683	5.98316	4.68949	0.275884	5.26836	22.4952	0.0317362	0.01836	0.622837	0.0190302	0.0542103	0.0302413	0.0239698	0.0107666	0.0114685	0.0050171	0.00991048	0.00509424	0.0087727	0.010204	0.00664509	0	0.438465	4.98076	4.47576	0.667531	12.0595	18.5489	1.28793	3.28121	0.218124	0.184935	0.92178	0.177357
k__Bacteria;p__Verrucomicrobia;c__[Spartobacteria];o__[Chthoniobacterales];f__[Chthoniobacteraceae];g__Ellin506;s__	0	0	0	0	0	0	0	0	0	0	0	0	0.00253182	0	0	0	0	0	0	0	0	0.00524572	0	0	0	0	0	0	0	0	0	0	0	0	0	0	0	0	0	0	0	0	0	0	0	0	0	0
k__Bacteria;p__WS1;c__;o__;f__;g__;s__	0	0	0	0	0	0	0	0	0	0	0	0	0	0	0	0	0	0	0	0	0	0	0	0	0	0	0	0	0	0	0.00991048	0	0	0	0	0	0	0	0	0	0	0	0	0	0	0	0	0
k__Bacteria;p__WWE1;c__[Cloacamonae];o__[Cloacamonales];f__[Cloacamonaceae];g__;s__	0	0	0	0	0	0	0	0.0096637	0	0	0	0	0	0	0	0	0	0	0	0	0	0	0	0	0	0	0	0	0	0	0	0	0	0	0	0	0	0	0	0	0	0	0	0	0	0	0	0
k__Bacteria;p__[Thermi];c__Deinococci;o__Deinococcales;f__Deinococcaceae;g__Deinococcus;s__	0	0.00406896	0	0	0	0	0	0	0	0	0	0	0	0	0	0	0	0	0	0	0	0	0	0	0	0	0	0	0	0	0	0	0	0	0	0	0	0	0	0	0	0	0	0	0	0	0	0
k__Bacteria;p__[Thermi];c__Deinococci;o__Deinococcales;f__Deinococcaceae;g__Deinococcus;s__aquatilis	0	0	0	0	0	0	0	0	0	0	0	0	0.00253182	0	0	0	0	0	0	0	0	0	0	0	0	0	0	0	0	0	0	0	0	0	0	0	0	0	0	0	0	0	0	0	0	0	0	0
k__Bacteria;p__[Thermi];c__Deinococci;o__Thermales;f__Thermaceae;g__Thermus;s__	0	0	0	0.0153955	0	0	0.0130949	0	0	0	0	0	0	0	0	0	0	0	0	0	0	0	0	0	0	0	0	0	0	0	0	0.0152827	0	0	0	0	0	0	0	0	0.0409125	0	0	0	0	0	0	0
